# Supplementary material for: Substituent-controlled divergent cyclization reactions of benzo[c][1,2]dithiol-3-ones and hexahydro-1,3,5-triazines
Source: Royal Society of Chemistry journal article supplement (doi:10.1039/d4qo00356j), 2024-01-01

**Supporting Information**  
*for*  
**Substituents-Controlled Divergent Cyclization Reactions of**  
**Benzo[c][1,2]dithiol-3-ones and Hexahydro-1,3,5-triazines**

Bohao Zhang, Sifan He, Na Dong, Antong Zhu, Haojie Duan, Dunjia Wang and Yao Zhou\*

Hubei Key Laboratory of Pollutant Analysis & Reuse Technology, College of Chemistry and Chemical Engineering at Hubei Normal University, Huangshi, Hubei 435002, P. R. China

\*E-mail: yaozhou@hbnu.edu.cn

## Table of Contents

|                                                                             |    |
|-----------------------------------------------------------------------------|----|
| 1. General information.....                                                 | 3  |
| 2. General procedure for the synthesis of starting materials <b>1</b> ..... | 4  |
| 3. General procedure to synthesize products <b>3</b> .....                  | 4  |
| 4. General procedure to synthesize products <b>4</b> .....                  | 5  |
| 5. Crystal data of <b>3a</b> .....                                          | 6  |
| 6. Characterization data for the products.....                              | 7  |
| 7. NMR spectroscopic data for the products .....                            | 21 |

## 1. General information

All reagents and solvents were obtained from commercial suppliers and used without further purification. The substituted amidines were purchased from Bide Pharmatech Ltd. Unless otherwise stated, all experiments were conducted in a seal tube under air atmosphere. Reactions were monitored by TLC or GC-MS analysis. Flash column chromatography was performed over silica gel (200-300 mesh).

$^1\text{H}$ -NMR and  $^{13}\text{C}$ -NMR spectra were recorded in  $\text{CDCl}_3$  on a Bruker Avance 300 spectrometer (300 MHz  $^1\text{H}$ , 75 MHz  $^{13}\text{C}$ ) at room temperature. Chemical shifts were reported in ppm on the scale relative to  $\text{CDCl}_3$  ( $\delta = 7.26$  for  $^1\text{H}$ -NMR,  $\delta = 77.00$  for  $^{13}\text{C}$ -NMR) or  $\text{DMSO}-d_6$  ( $\delta = 2.50$  for  $^1\text{H}$ -NMR,  $\delta = 39.96$  for  $^{13}\text{C}$ -NMR) as an internal reference. High resolution mass spectra were recorded using Q-TOF time-of-flight mass spectrometer. Coupling constants ( $J$ ) were reported in Hertz (Hz). The 1,2-benzodithiol-3-ones **1** were prepared according to our previous work<sup>1</sup>. The 1,3,5-trimethyl-1,3,5-triazinane, 1,3,5-triphenyl-1,3,5-triazinane, 1,3,5-tribenzyl-1,3,5-triazinane, 2,2'-(5-(3-hydroxypropyl)-1,3,5-triazinane-1,3-diyl)bis(ethan-1-ol) are commercially available. Other N-substituted hexahydro-1,3,5-triazines were prepared according the condensation of paraformaldehyde and substituted amines.<sup>2</sup>

---

<sup>1</sup> Zhou, Y.; Zhang, B.; Dong, J.; Li, J.; Yang, S.; Ye, L. *Org. Lett.* **2022**, *24*, 9012-9016.

<sup>2</sup> (a) Guranova, N.; Dar'in, D.; Krasavin, M. *Synthesis* **2018**, *50*, 2001-2008. (b) Giumanini, A. G.; Verardo, G.; Zangrando, E.; Lassiani, L. *J. Prakt. Chem.* **1987**, *329*, 1087-1103. (c) Ruscoe, R. E.; Callingham, M.; Baker, J. A.; Korkis, S. E.; Lam, H. W. *Chem. Commun.* **2019**, *55*, 838-841.

## 2. General procedure for the synthesis of starting materials 1

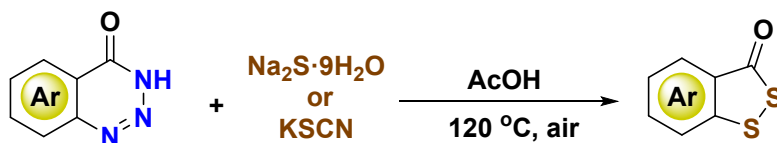

1,2-Benzodithiol-3-ones **1** were prepared according to our previous work which are known compounds.  $\text{AcOH}$  (15 mL) was added to a mixture of benzo[d][1,2,3]triazin-4(3H)-one (3 mmol) and  $\text{Na}_2\text{S}\cdot 9\text{H}_2\text{O}$  or  $\text{KSCN}$  (12 mmol) in a 150 mL sealed tube. Then the reaction mixture was stirred at  $120\text{ }^\circ\text{C}$  in an oil bath for 8 h. Upon completion of the reaction, ethyl acetate was added to the mixture, and then washed with saturated brine with thrice. The combined water layers were extracted with ethyl acetate twice. The combined organic layers were dried over anhydrous  $\text{Na}_2\text{SO}_4$ . The solvents were removed via rotary evaporator and the residue was purified by flash column chromatograph (silica gel, petroleum ether:EtOAc = 25:1, v/v) to give the desired product.

## 3. General procedure to the synthesis of 6H-benzo[g][1,3,5]thiadiazocin-6-ones **3**

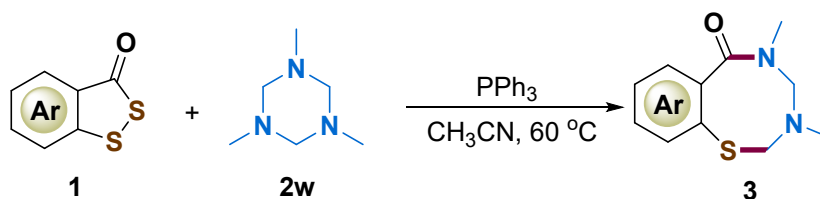

$\text{CH}_3\text{CN}$  (2 mL) was added to a mixture of 1,2-benzodithiol-3-ones **1** (0.3 mmol), 1,3,5-trimethyl-1,3,5-triazinane **2** (0.6 mmol) and  $\text{PPh}_3$  (77.4 mg, 0.3 mmol) in a sealed tube. Then the reaction mixture was stirred at  $60\text{ }^\circ\text{C}$  in an oil bath under air for 12 h. Upon completion of the reaction, the solvents were removed via rotary evaporator and the residue was purified by flash column chromatograph (silica gel, petroleum ether: EtOAc as the eluent) to give the desired product 6H-benzo[g][1,3,5]thiadiazocin-6-ones **3**.

[Scale-up for larger synthesis of **3a**]:  $\text{CH}_3\text{CN}$  (30 mL) was added to a mixture of 1,2-benzodithiol-3-ones **1a** (0.84 g, 5 mmol), 1,3,5-trimethyl-1,3,5-triazinane **2w** (1.29 g, 10 mmol) and  $\text{PPh}_3$  (1.31 g, 5 mmol) in a 150 mL sealed tube. Then the reaction mixture was stirred at  $60\text{ }^\circ\text{C}$  in an oil bath under air for 18 h. Upon

completion of the reaction, the solvents were removed via rotary evaporator and the residue was purified by flash column chromatograph (silica gel, petroleum ether:EtOAc = 3:1, v/v) to give the desired product 6H-benzo[g][1,3,5]thiadiazocin-6-ones **3a** as white solid (0.87 g, 79%).

#### 4. General procedure to synthesize 2,3-dihydrobenzothiazinones **4**

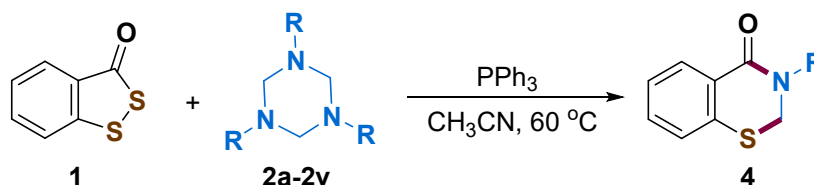

$\text{CH}_3\text{CN}$  (2 mL) was added to a mixture of 1,2-benzodithiol-3-ones **1** (0.3 mmol), 1,3,5-triazinane **2** (0.45 mmol) and  $\text{PPh}_3$  (77.4 mg, 0.3 mmol) in a sealed tube. Then the reaction mixture was stirred at  $60\text{ }^\circ\text{C}$  in an oil bath under air for 12 h. Upon completion of the reaction, the solvents were removed via rotary evaporator and the residue was purified by flash column chromatograph (silica gel, petroleum ether:EtOAc as the eluent) to give the desired product 2,3-dihydrobenzothiazinones **4**.

[Scale-up for larger synthesis of **4s**]:  $\text{CH}_3\text{CN}$  (25 mL) was added to a mixture of 1,2-benzodithiol-3-ones **1a** (0.84 g, 5 mmol), 1,3,5-triazinane **4s** (1.62 g, 7.5 mmol) and  $\text{PPh}_3$  (1.31 g, 5 mmol) in a 150 mL sealed tube. Then the reaction mixture was stirred at  $60\text{ }^\circ\text{C}$  in an oil bath under air for 20 h. Upon completion of the reaction, the solvents were removed via rotary evaporator and the residue was purified by flash column chromatograph (silica gel, petroleum ether:EtOAc = 1:1, v/v) to give the desired product 2,3-dihydrobenzothiazinones **4s** as colourless oil (0.92 g, 88%).

## 5. Crystal data of 3a

Crystallographic data for compound **3a** (CCDC-2334598) has already been deposited with the Cambridge Crystallographic Data Centre, Copies of the data can be obtained, free of charge, on application to CCDC (Email: deposit@ccdc.cam.ac.uk)

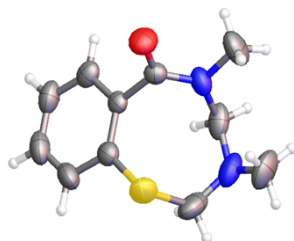

Displacement ellipsoids are drawn at 50% probability level

|                    |                                            |                                 |
|--------------------|--------------------------------------------|---------------------------------|
| Bond precision:    | C-C = 0.0046 Å                             | Wavelength=0.71073              |
| Cell:              | a=6.5838(10) b=13.518(3) c=25.245(4)       |                                 |
|                    | alpha=90 beta=90.0100 gamma=90             |                                 |
| Temperature:       | 298 K                                      |                                 |
|                    | Calculated                                 | Reported                        |
| Volume             | 2246.8(7)                                  | 2246.9(7)                       |
| Space group        | P 21/c                                     | P 1 21/c 1                      |
| Hall group         | -P 2ybc                                    | -P 2ybc                         |
| Moiety formula     | C11 H14 N2 O S                             | C11 H14 N2 O S                  |
| Sum formula        | C11 H14 N2 O S                             | C11 H14 N2 O S                  |
| Mr                 | 222.30                                     | 222.31                          |
| Dx,g cm-3          | 1.314                                      | 1.314                           |
| Z                  | 8                                          | 8                               |
| Mu (mm-1)          | 0.263                                      | 0.263                           |
| F000               | 944.0                                      | 945.3                           |
| F000'              | 945.30                                     |                                 |
| h,k,lmax           | 7,16,30                                    | 7,16,30                         |
| Nref               | 3948                                       | 3940                            |
| Tmin,Tmax          |                                            | 0.531,1.000                     |
| Tmin'              |                                            |                                 |
| Correction method= | # Reported T Limits: Tmin=0.531 Tmax=1.000 |                                 |
| AbsCorr =          | MULTI-SCAN                                 |                                 |
| Data completeness= | 0.998                                      | Theta(max)= 24.990              |
| R(reflections)=    | 0.0513( 2680)                              | wR2(reflections)= 0.1747( 3940) |
| S =                | 1.050                                      | Npar= 282                       |

## 6. Characterization data for the products

### 3,5-dimethyl-2,3,4,5-tetrahydro-6H-benzo[g][1,3,5]thiadiazocin-6-one (3a)

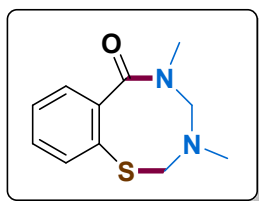

The reaction was performed following the general procedure.

The residue was purified by flash column chromatograph (silica gel, petroleum ether:EtOAc = 3:1, v/v) to give the product as a white solid (53.9 mg, 81%).  $^1\text{H}$  NMR (300 MHz,  $\text{CDCl}_3$ )  $\delta$  7.52 (dd,  $J$  = 6.5, 2.1 Hz, 1H), 7.39 (dd,  $J$  = 5.3, 3.6 Hz, 1H), 7.31 (dd,  $J$  = 8.4, 5.3 Hz, 2H), 4.32 (dd,  $J$  = 14.0, 8.6 Hz, 2H), 4.14 (d,  $J$  = 14.6 Hz, 1H), 3.95 (d,  $J$  = 13.6 Hz, 1H), 3.22 (s, 3H), 2.56 (s, 3H).  $^{13}\text{C}$  NMR (75 MHz,  $\text{CDCl}_3$ )  $\delta$  171.2, 141.7, 135.2, 133.6, 130.3, 128.7, 128.2, 69.6, 65.2, 38.9, 37.5.

HRMS (ESI,  $m/z$ ) calcd for  $\text{C}_{11}\text{H}_{15}\text{N}_2\text{OS}$   $[\text{M}+\text{H}]^+$ : 223.0900; found: 223.0905.

### 3,5-dimethyl-8-morpholino-2,3,4,5-tetrahydro-6H-benzo[g][1,3,5]thiadiazocin-6-one (3b)

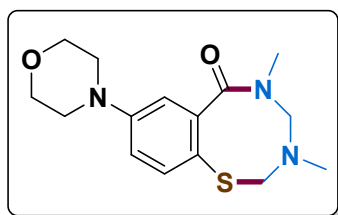

The reaction was performed following the general procedure. The residue was purified by flash column chromatograph (silica gel, petroleum ether:EtOAc = 1:1, v/v) to give the product as a yellow oil (84.7 mg, 92%).

$^1\text{H}$  NMR (300 MHz,  $\text{CDCl}_3$ )  $\delta$  7.41 (d,  $J$  = 8.3 Hz, 1H), 6.92 – 6.80 (m, 2H), 4.39 (d,  $J$  = 14.7 Hz, 1H), 4.18 (t,  $J$  = 13.9 Hz, 2H), 3.94 (d,  $J$  = 13.5 Hz, 1H), 3.84 – 3.77 (m, 4H), 3.23 (s, 3H), 3.20 – 3.13 (m, 4H), 2.57 (s, 3H).  $^{13}\text{C}$  NMR (75 MHz,  $\text{CDCl}_3$ )  $\delta$  171.5, 151.2, 142.7, 136.5, 122.6, 116.9, 113.7, 69.7, 66.6, 65.9, 48.2, 39.0, 37.6. HRMS (ESI,  $m/z$ ) calcd for  $\text{C}_{15}\text{H}_{22}\text{N}_3\text{O}_2\text{S}$   $[\text{M}+\text{H}]^+$ : 308.1428; found: 308.1430.

### 3,5,8-trimethyl-2,3,4,5-tetrahydro-6H-benzo[g][1,3,5]thiadiazocin-6-one (3c)

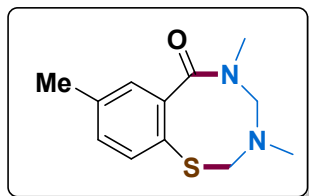

The reaction was performed following the general procedure. The residue was purified by flash column chromatograph (silica gel, petroleum ether:EtOAc = 3:1, v/v) to give the product as a white solid (58.7 mg, 83%).  $^1\text{H}$  NMR (300 MHz,  $\text{CDCl}_3$ )  $\delta$  7.47 – 7.22 (m, 2H), 7.09 (d,  $J$  = 7.4 Hz, 1H), 4.28 (t,  $J$  = 12.9 Hz, 2H), 4.08 (d,  $J$  = 14.4 Hz, 1H), 3.91 (d,  $J$  = 13.6 Hz, 1H), 3.16 (s, 3H), 2.51 (s, 3H), 2.27 (s, 3H).  $^{13}\text{C}$  NMR (75 MHz,  $\text{CDCl}_3$ )  $\delta$  171.4, 140.4, 138.5, 135.5, 133.3, 129.5, 128.3, 69.7, 65.0, 38.9, 37.4, 21.0. HRMS (ESI,  $m/z$ ) calcd for  $\text{C}_{12}\text{H}_{17}\text{N}_2\text{OS}$   $[\text{M}+\text{H}]^+$ : 237.1057; found: 237.1057.

**3,5-dimethyl-8-(4-((1s,4r)-4-propylcyclohexyl)phenyl)-2,3,4,5-tetrahydro-6H-benzo[g][1,3,5]thiadiazocin-6-one (3d)**

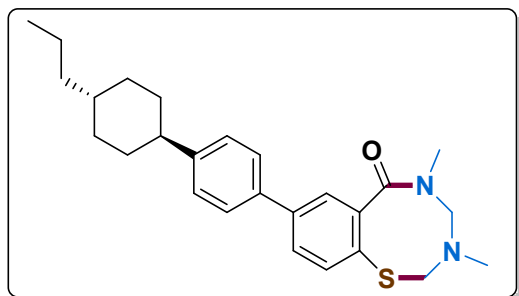

The reaction was performed following the general procedure. The residue was purified by flash column chromatograph (silica gel, petroleum ether:EtOAc = 2:1, v/v) to give the product as a white solid (101.3 mg, 80%). <sup>1</sup>H NMR (300 MHz, CDCl<sub>3</sub>) δ 7.62 (d, *J* = 1.5 Hz, 1H), 7.55 (dd, *J* = 9.9, 4.9 Hz, 2H), 7.49 (d, *J* = 8.2 Hz, 2H), 7.25 (d, *J* = 8.3 Hz, 2H), 4.37 (dd, *J* = 27.8, 14.1 Hz, 2H), 4.16 (d, *J* = 14.6 Hz, 1H), 4.00 (d, *J* = 13.6 Hz, 1H), 3.24 (s, 3H), 2.58 (s, 3H), 2.53 – 2.41 (m, 1H), 1.87 (t, *J* = 11.1 Hz, 4H), 1.47 (td, *J* = 12.4, 2.7 Hz, 2H), 1.39 – 1.26 (m, 3H), 1.20 (dd, *J* = 9.4, 5.6 Hz, 2H), 1.10 – 0.97 (m, 2H), 0.88 (t, *J* = 7.1 Hz, 3H). <sup>13</sup>C NMR (75 MHz, CDCl<sub>3</sub>) δ 171.3, 147.8, 141.7, 141.6, 136.9, 135.7, 132.1, 128.6, 127.4, 126.9, 126.6, 69.7, 65.4, 44.3, 39.7, 39.0, 37.6, 37.0, 34.3, 33.5, 20.0, 14.5. HRMS (ESI, *m/z*) calcd for C<sub>26</sub>H<sub>35</sub>N<sub>2</sub>OS [M+H]<sup>+</sup>: 423.2465; found: 423.2468.

**3,5-dimethyl-8-(naphthalen-2-yl)-2,3,4,5-tetrahydro-6H-benzo[g][1,3,5]thiadiazocin-6-one (3e)**

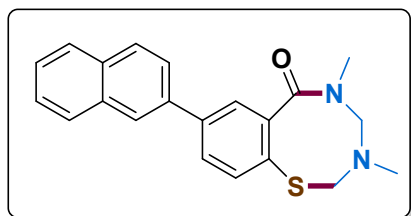

The reaction was performed following the general procedure. The residue was purified by flash column chromatograph (silica gel, petroleum ether:EtOAc = 2:1, v/v) to give the product as a white solid (85.6 mg, 82%). <sup>1</sup>H NMR (300 MHz, CDCl<sub>3</sub>) δ 8.06 (s, 1H), 7.88 (dd, *J* = 22.7, 13.7 Hz, 4H), 7.77 – 7.63 (m, 3H), 7.54 – 7.45 (m, 2H), 4.44 (dd, *J* = 31.5, 14.1 Hz, 2H), 4.22 (d, *J* = 14.5 Hz, 1H), 4.06 (d, *J* = 13.6 Hz, 1H), 3.30 (s, 3H), 2.63 (s, 3H). <sup>13</sup>C NMR (75 MHz, CDCl<sub>3</sub>) δ 171.2, 141.6, 136.7, 133.6, 132.8, 129.0, 128.7, 128.3, 127.6, 127.0, 126.5, 126.3, 126.0, 125.0, 70.0, 39.0, 37.6. HRMS (ESI, *m/z*) calcd for C<sub>21</sub>H<sub>21</sub>N<sub>2</sub>OS [M+H]<sup>+</sup>: 349.1370; found: 349.1374.



**7-fluoro-3,5-dimethyl-2,3,4,5-tetrahydro-6H-benzo[g][1,3,5]thiadiazocin-6-one**  
**(3f)**

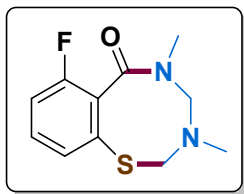

The reaction was performed following the general procedure. The residue was purified by flash column chromatograph (silica gel, petroleum ether:EtOAc = 3:1, v/v) to give the product as a white solid (51.1 mg, 71%). <sup>1</sup>H NMR (300 MHz, CDCl<sub>3</sub>) δ 7.28 (dd, *J* = 6.9, 6.0 Hz, 1H), 7.25 – 7.17 (m, 1H), 7.07 – 6.96 (m, 1H), 4.39 (d, *J* = 14.7 Hz, 1H), 4.28 (d, *J* = 13.6 Hz, 1H), 4.15 (d, *J* = 14.7 Hz, 1H), 3.88 (d, *J* = 13.6 Hz, 1H), 3.19 (s, 3H), 2.51 (s, 3H). <sup>13</sup>C NMR (75 MHz, CDCl<sub>3</sub>) δ 166.2, 159.0 (d, *J* = 255.8 Hz), 136.3 (d, *J* = 3.0 Hz), 130.9, 130.8, 116.4, 116.1, 69.5, 66.0, 38.9, 37.4. HRMS (ESI, *m/z*) calcd for C<sub>11</sub>H<sub>14</sub>FN<sub>2</sub>OS [M+H]<sup>+</sup>: 241.0806; found: 241.0809.

**8-fluoro-3,5-dimethyl-2,3,4,5-tetrahydro-6H-benzo[g][1,3,5]thiadiazocin-6-one**  
**(3g)**

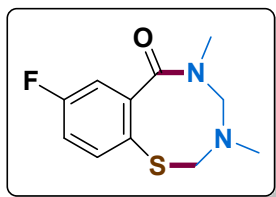

The reaction was performed following the general procedure. The residue was purified by flash column chromatograph (silica gel, petroleum ether:EtOAc = 2:1, v/v) to give the product as a white solid (54.7 mg, 76%). <sup>1</sup>H NMR (300 MHz, CDCl<sub>3</sub>) δ 7.56 (dd, *J* = 8.5, 5.4 Hz, 1H), 7.15 (dd, *J* = 8.6, 2.8 Hz, 1H), 7.06 (td, *J* = 8.4, 2.9 Hz, 1H), 4.35 (dd, *J* = 23.9, 14.2 Hz, 2H), 4.21 (d, *J* = 14.7 Hz, 1H), 3.98 (d, *J* = 13.6 Hz, 1H), 3.26 (s, 3H), 2.61 (s, 3H). <sup>13</sup>C NMR (75 MHz, CDCl<sub>3</sub>) δ 169.7, 162.6 (d, *J* = 249.0 Hz), 143.7 (d, *J* = 8.0 Hz), 137.6 (d, *J* = 8.0 Hz), 129.0 (d, *J* = 3.6 Hz), 117.5 (d, *J* = 21.0 Hz), 115.2 (d, *J* = 23.3 Hz), 69.6, 65.7, 39.0, 37.6. HRMS (ESI, *m/z*) calcd for C<sub>11</sub>H<sub>14</sub>FN<sub>2</sub>OS [M+H]<sup>+</sup>: 241.0806; found: 241.0807.

**8-chloro-3,5-dimethyl-2,3,4,5-tetrahydro-6H-benzo[g][1,3,5]thiadiazocin-6-one**  
**(3h)**

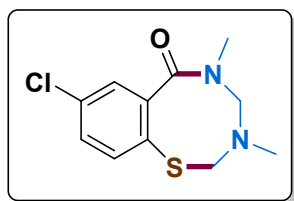

The reaction was performed following the general procedure. The residue was purified by flash column chromatograph (silica gel, petroleum ether:EtOAc = 3:1, v/v) to give the product as a white solid (62.2 mg, 81%). <sup>1</sup>H NMR (300 MHz, CDCl<sub>3</sub>) δ 7.47 (d, *J* = 8.3 Hz, 1H), 7.39 (d, *J* = 2.3 Hz, 1H), 7.28 (dd, *J* = 8.3, 2.4 Hz, 1H), 4.33 (dd, *J* = 14.1, 10.8 Hz, 2H), 4.17 (d, *J* = 14.7 Hz, 1H), 3.95 (d, *J* = 13.6 Hz, 1H), 3.21 (s, 3H), 2.57 (s, 3H). <sup>13</sup>C NMR (75 MHz, CDCl<sub>3</sub>) δ 169.7, 143.1, 136.6, 134.9, 132.2, 130.3, 128.3, 69.6, 65.5, 38.9, 37.6. HRMS (ESI, *m/z*) calcd for C<sub>11</sub>H<sub>14</sub>ClN<sub>2</sub>OS [M+H]<sup>+</sup>: 257.0510; found: 257.0510.

**9-chloro-3,5-dimethyl-2,3,4,5-tetrahydro-6H-benzo[g][1,3,5]thiadiazocin-6-one****(3i)**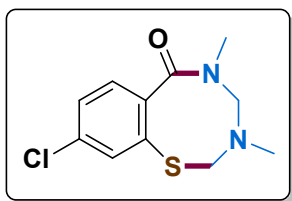

The reaction was performed following the general procedure. The residue was purified by flash column chromatograph (silica gel, petroleum ether:EtOAc = 3:1, v/v) to give the product as a white solid (60.6 mg, 79%). <sup>1</sup>H NMR (300 MHz, CDCl<sub>3</sub>) δ 7.53 (d, *J* = 1.2 Hz, 1H), 7.38 – 7.27 (m, 2H), 4.32 (dd, *J* = 14.1, 9.0 Hz, 2H), 4.14 (d, *J* = 14.6 Hz, 1H), 3.97 (d, *J* = 13.6 Hz, 1H), 3.19 (s, 3H), 2.55 (s, 3H). <sup>13</sup>C NMR (75 MHz, CDCl<sub>3</sub>) δ 170.1, 139.7, 135.4, 135.3, 134.5, 129.6, 128.7, 69.5, 65.0, 38.7, 37.4. HRMS (ESI, *m/z*) calcd for C<sub>11</sub>H<sub>14</sub>ClN<sub>2</sub>OS [M+H]<sup>+</sup>: 257.0510; found: 257.0515.

**8-bromo-3,5-dimethyl-2,3,4,5-tetrahydro-6H-benzo[g][1,3,5]thiadiazocin-6-one****(3j)**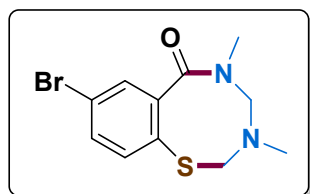

The reaction was performed following the general procedure. The residue was purified by flash column chromatograph (silica gel, petroleum ether:EtOAc = 3:1, v/v) to give the product as a white solid (66.4 mg, 74%). <sup>1</sup>H NMR (300 MHz, CDCl<sub>3</sub>) δ 7.54 (d, *J* = 1.6 Hz, 1H), 7.50 – 7.36 (m, 2H), 4.34 (dd, *J* = 13.8, 11.1 Hz, 2H), 4.17 (d, *J* = 14.7 Hz, 1H), 3.95 (d, *J* = 13.6 Hz, 1H), 3.22 (s, 3H), 2.57 (s, 3H). <sup>13</sup>C NMR (75 MHz, CDCl<sub>3</sub>) δ 169.6, 143.2, 136.8, 133.3, 132.8, 131.2, 122.8, 69.6, 65.4, 38.9, 37.69. HRMS (ESI, *m/z*) calcd for C<sub>11</sub>H<sub>14</sub>BrN<sub>2</sub>OS [M+H]<sup>+</sup>: 301.0005; found: 301.0007.

**3,5-dimethyl-8-(trifluoromethyl)-2,3,4,5-tetrahydro-6H-benzo[g][1,3,5]thiadiazocin-6-one (3k)**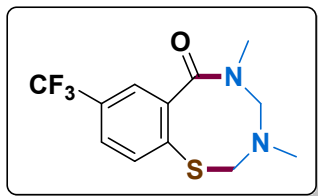

The reaction was performed following the general procedure. The residue was purified by flash column chromatograph (silica gel, petroleum ether:EtOAc = 2:1, v/v) to give the product as a white solid (50.6 mg, 57%). <sup>1</sup>H NMR (300 MHz, DMSO) δ 7.82 (s, 1H), 7.75 (d, *J* = 8.1 Hz, 1H), 7.56 (d, *J* = 8.0 Hz, 1H), 4.51 (d, *J* = 13.2 Hz, 1H), 4.34 – 4.20 (m, 2H), 4.09 (d, *J* = 13.2 Hz, 1H), 3.35 (s, 3H), 3.12 (s, 3H). <sup>13</sup>C NMR (75 MHz, DMSO) δ 169.4, 146.3, 134.8, 132.0 (q, *J* = 11.9 Hz), 130.6 (q, *J* = 32.3 Hz), 129.7 (q, *J* = 3.9 Hz), 129.3, 124.0 (q, *J* = 271.5

Hz), 68.9, 66.1, 38.4, 37.5. HRMS (ESI,  $m/z$ ) calcd for  $C_{12}H_{14}F_3N_2OS$   $[M+H]^+$ : 297.0774; found: 297.0774.

**9-bromo-7-fluoro-3,5-dimethyl-2,3,4,5-tetrahydro-6H-**

**benzo[g][1,3,5]thiadiazocin-6-one (3l)**

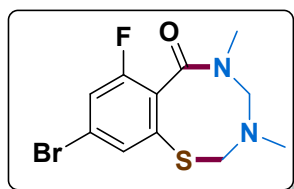

The reaction was performed following the general procedure.

The residue was purified by flash column chromatograph (silica gel, petroleum ether:EtOAc = 3:1, v/v) to give the product as a white solid (66.7 mg, 70%).

$^1H$  NMR (300 MHz,  $CDCl_3$ )  $\delta$  7.49 (d,  $J$  = 3.9 Hz, 1H), 7.20 (dd,  $J$  = 8.0, 6.3 Hz, 1H), 4.46 – 4.26 (m, 2H), 4.16 (dd,  $J$  = 14.7, 5.6 Hz, 1H), 3.92 (dd,  $J$  = 13.5, 5.9 Hz, 1H), 3.19 (d,  $J$  = 6.2 Hz, 3H), 2.52 (d,  $J$  = 6.0 Hz, 3H).  $^{13}C$  NMR (75 MHz,  $CDCl_3$ )  $\delta$  165.5, 158.9 (d,  $J$  = 255.8 Hz), 138.0, 133.6, 123.1 (d,  $J$  = 10.4 Hz), 120.0, 119.7, 69.5, 66.1, 39.0, 37.5. HRMS (ESI,  $m/z$ ) calcd for  $C_{11}H_{13}BrFN_2OS$   $[M+H]^+$ : 318.9911; found: 318.9913.

**(1S,2R,4S)-1,7,7-trimethylbicyclo[2.2.1]heptan-2-yl 3,5-dimethyl-6-oxo-3,4,5,6-tetrahydro-2H-benzo[g][1,3,5]thiadiazocine-9-carboxylate (3m)**

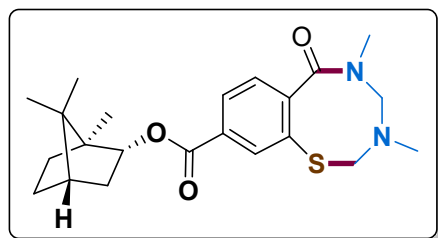

The reaction was performed following the general procedure. The residue was purified by flash column chromatograph (silica gel, petroleum ether:EtOAc = 2:1, v/v) to give the product as a white solid (77.1 mg, 64%).

$^1H$  NMR (300 MHz,  $CDCl_3$ )  $\delta$  8.15 (s, 1H), 7.95 (d,  $J$  = 8.0 Hz, 1H), 7.44 (d,  $J$  = 8.0 Hz, 1H), 5.05 (d,  $J$  = 9.1 Hz, 1H), 4.40 – 4.25 (m, 2H), 4.13 (d,  $J$  = 14.6 Hz, 1H), 3.96 (dd,  $J$  = 13.7, 2.9 Hz, 1H), 3.20 (s, 3H), 2.55 (s, 3H), 2.47 – 2.36 (m, 1H), 2.08 – 1.98 (m, 1H), 1.72 (dd,  $J$  = 18.0, 4.0 Hz, 2H), 1.32 – 1.19 (m, 2H), 1.08 – 1.01 (m, 1H), 0.90 (s, 3H), 0.85 (s, 6H).  $^{13}C$  NMR (75 MHz,  $CDCl_3$ )  $\delta$  170.4, 165.6, 133.1, 132.6, 128.5, 128.3, 124.4, 119.0, 81.2, 69.6, 49.2, 49.1, 47.9, 44.9, 39.0, 36.8, 28.1, 27.4, 19.7, 18.9, 13.6. HRMS (ESI,  $m/z$ ) calcd for  $C_{22}H_{31}N_2O_3S$   $[M+H]^+$ : 403.2050; found: 403.2050.

**3-phenyl-2,3-dihydro-4H-benzo[e][1,3]thiazin-4-one (4a) (CAS Number: 2259305-57-0)**

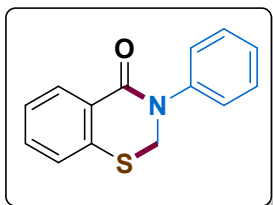

The reaction was performed following the general procedure. The residue was purified by flash column chromatograph (silica gel, petroleum ether:EtOAc = 10:1, v/v) to give the product as a yellow oil (60.0 mg, 83%). <sup>1</sup>H NMR (300 MHz, CDCl<sub>3</sub>) δ 8.19 (d, *J* = 8.9 Hz, 1H), 7.47 – 7.34 (m, 6H), 7.33 – 7.29 (m, 2H), 4.98 (s, 2H). <sup>13</sup>C NMR (75 MHz, CDCl<sub>3</sub>) δ 163.5, 142.2, 137.4, 135.7, 132.0, 131.2, 129.6, 127.3, 127.1, 126.3, 125.8, 51.7.

**3-(p-tolyl)-2,3-dihydro-4H-benzo[e][1,3]thiazin-4-one (4b) (CAS Number: 2259305-93-4)**

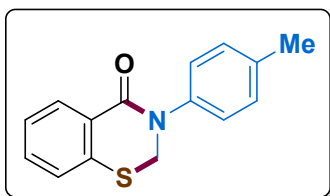

The reaction was performed following the general procedure. The residue was purified by flash column chromatograph (silica gel, petroleum ether:EtOAc = 10:1, v/v) to give the product as a colourless oil (67.3 mg, 88%). <sup>1</sup>H NMR (300 MHz, CDCl<sub>3</sub>) δ 8.19 (dd, *J* = 7.8, 1.4 Hz, 1H), 7.39 (dd, *J* = 7.0, 1.4 Hz, 1H), 7.33 (dd, *J* = 8.3, 6.8 Hz, 2H), 7.28 – 7.21 (m, 4H), 4.96 (s, 2H), 2.37 (s, 3H). <sup>13</sup>C NMR (75 MHz, CDCl<sub>3</sub>) δ 163.6, 139.7, 137.3, 137.0, 135.7, 131.9, 131.1, 129.9, 127.3, 126.2, 125.6, 51.7, 21.1.

**3-(4-methoxyphenyl)-2,3-dihydro-4H-benzo[e][1,3]thiazin-4-one (4c) (CAS Number: 2259305-59-2)**

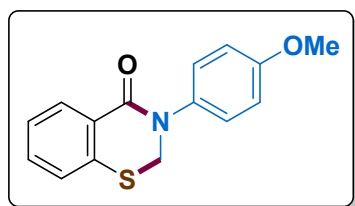

The reaction was performed following the general procedure. The residue was purified by flash column chromatograph (silica gel, petroleum ether:EtOAc = 20:1 to 5:1, v/v) to give the product as a white solid (68.2 mg, 84%). <sup>1</sup>H NMR (300 MHz, CDCl<sub>3</sub>) δ 8.12 (dd, *J* = 7.7, 1.0 Hz, 1H), 7.38 – 7.27 (m, 2H), 7.22 (dd, *J* = 8.8, 1.9 Hz, 3H), 6.88 (d, *J* = 8.9 Hz, 2H), 4.86 (s, 2H), 3.76 (s, 3H). <sup>13</sup>C NMR (75 MHz, CDCl<sub>3</sub>) δ 163.7, 158.4, 137.3, 135.2, 131.8, 131.1, 129.7, 127.2, 127.1, 126.2, 114.5, 55.5, 51.8.

### 3-(4-(methylthio)phenyl)-2,3-dihydro-4H-benzo[e][1,3]thiazin-4-one (4d)

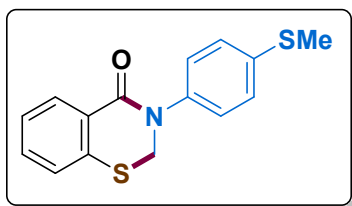

The reaction was performed following the general procedure. The residue was purified by flash column chromatograph (silica gel, petroleum ether:EtOAc = 20:1 to 5:1, v/v) to give the product as a white solid (68.0 mg, 79%). <sup>1</sup>H NMR (300 MHz, CDCl<sub>3</sub>) δ 8.18 (d, *J* = 7.8 Hz, 1H), 7.45 – 7.37 (m, 1H), 7.34 (d, *J* = 6.8 Hz, 1H), 7.33 – 7.27 (m, 5H), 4.96 (s, 2H), 2.50 (s, 3H). <sup>13</sup>C NMR (75 MHz, CDCl<sub>3</sub>) δ 163.5, 139.3, 137.5, 137.3, 132.0, 131.2, 129.5, 127.4, 127.3, 126.3, 126.2, 51.6, 16.1. HRMS (ESI, *m/z*) calcd for C<sub>15</sub>H<sub>14</sub>NOS<sub>2</sub> [M+H]<sup>+</sup>: 288.0512; found: 288.0512.

### 3-(4-(tert-butyl)phenyl)-2,3-dihydro-4H-benzo[e][1,3]thiazin-4-one (4e)

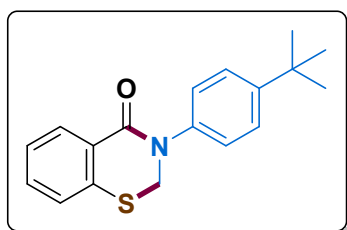

The reaction was performed following the general procedure by using DPPE as the additive. The residue was purified by flash column chromatograph (silica gel, petroleum ether:EtOAc = 20:1, v/v) to give the product as a white solid (56.1 mg, 63%). <sup>1</sup>H NMR (300 MHz, CDCl<sub>3</sub>) δ 8.19 (d, *J* = 6.7 Hz, 1H), 7.43 (t, *J* = 7.7 Hz, 3H), 7.38 – 7.34 (m, 1H), 7.30 (dt, *J* = 5.3, 3.0 Hz, 3H), 4.98 (s, 2H), 1.33 (s, 9H). <sup>13</sup>C NMR (75 MHz, CDCl<sub>3</sub>) δ 163.6, 150.0, 139.6, 137.3, 131.8, 131.2, 129.7, 128.4, 127.2, 126.2, 125.2, 51.7, 34.6, 31.3. HRMS (ESI, *m/z*) calcd for C<sub>18</sub>H<sub>20</sub>NOS [M+H]<sup>+</sup>: 298.1261; found: 298.1264.

### 3-(benzo[d][1,3]dioxol-5-yl)-2,3-dihydro-4H-benzo[e][1,3]thiazin-4-one (4f)

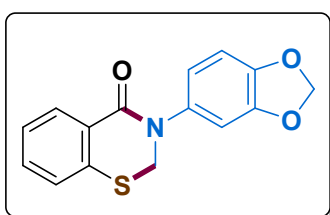

The reaction was performed following the general procedure. The residue was purified by flash column chromatograph (silica gel, petroleum ether:EtOAc = 3:1, v/v) to give the product as a yellow oil (53.0 mg, 62%). <sup>1</sup>H NMR (300 MHz, CDCl<sub>3</sub>) δ 8.17 (dd, *J* = 7.8, 1.1 Hz, 1H), 7.44 – 7.37 (m, 1H), 7.32 (dd, *J* = 7.7, 6.4 Hz, 2H), 6.88 (d, *J* = 1.5 Hz, 1H), 6.86 – 6.76 (m, 2H), 6.00 (s, 2H), 4.91 (s, 2H). <sup>13</sup>C NMR (75 MHz, CDCl<sub>3</sub>) δ 163.7, 148.0, 146.7, 137.3, 136.2, 131.9, 131.1, 129.5, 127.2, 126.3, 119.2, 108.4, 107.8, 101.6, 51.9. HRMS (ESI, *m/z*) calcd for C<sub>15</sub>H<sub>12</sub>NO<sub>3</sub>S [M+H]<sup>+</sup>: 286.0533; found: 286.0538.

### 3-(4-(dimethylamino)phenyl)-2,3-dihydro-4H-benzo[e][1,3]thiazin-4-one (4g)

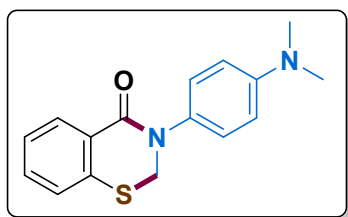

The reaction was performed following the general procedure. The residue was purified by flash column chromatograph (silica gel, petroleum ether:EtOAc = 3:1, v/v) to give the product as a yellow solid (65.5 mg, 77%). <sup>1</sup>H NMR (300 MHz, CDCl<sub>3</sub>) δ 8.16 (d, *J* = 7.8 Hz, 1H), 7.38 – 7.27 (m, 2H), 7.22 (dd, *J* = 15.8, 8.2 Hz, 3H), 6.72 (d, *J* = 9.0 Hz, 2H), 4.89 (s, 2H), 2.94 (s, 6H). <sup>13</sup>C NMR (75 MHz, CDCl<sub>3</sub>) δ 163.7, 149.5, 137.3, 131.6, 131.4, 131.0, 129.8, 127.1, 126.5, 126.0, 112.7, 51.8, 40.6. HRMS (ESI, *m/z*) calcd for C<sub>16</sub>H<sub>17</sub>N<sub>2</sub>OS [M+H]<sup>+</sup>: 285.1057; found: 285.1058.

### 3-(4-(morpholinomethyl)phenyl)-2,3-dihydro-4H-benzo[e][1,3]thiazin-4-one (4h)

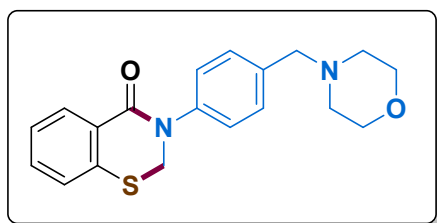

The reaction was performed following the general procedure. The residue was purified by flash column chromatograph (silica gel, petroleum ether:EtOAc = 1:4, v/v) to give the product as a colourless oil (87.7 mg, 86%). <sup>1</sup>H NMR (300 MHz, CDCl<sub>3</sub>) δ 8.18 (dd, *J* = 7.8, 1.1 Hz, 1H), 7.41 (dd, *J* = 10.2, 4.8 Hz, 3H), 7.32 (dt, *J* = 6.4, 3.0 Hz, 4H), 4.97 (s, 2H), 3.75 – 3.68 (m, 4H), 3.51 (s, 2H), 2.51 – 2.40 (m, 4H). <sup>13</sup>C NMR (75 MHz, CDCl<sub>3</sub>) δ 163.5, 141.2, 137.3, 136.7, 131.9, 131.2, 129.9, 129.6, 127.3, 126.3, 125.6, 66.9, 62.8, 53.6, 51.6. HRMS (ESI, *m/z*) calcd for C<sub>19</sub>H<sub>21</sub>N<sub>2</sub>O<sub>2</sub>S [M+H]<sup>+</sup>: 341.1319; found: 341.1320.

### methyl 4-(4-oxo-2H-benzo[e][1,3]thiazin-3(4H)-yl)benzoate (4i)

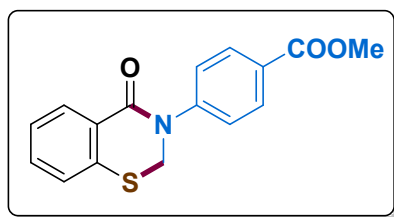

The reaction was performed following the general procedure. The residue was purified by flash column chromatograph (silica gel, petroleum ether:EtOAc = 3:1, v/v) to give the product as a white solid (62.3 mg, 70%). <sup>1</sup>H NMR (300 MHz, CDCl<sub>3</sub>) δ 8.19 (dd, *J* = 7.8, 1.1 Hz, 1H), 8.10 (d, *J* = 8.6 Hz, 2H), 7.47 (d, *J* = 8.7 Hz, 2H), 7.42 (d, *J* = 8.4 Hz, 1H), 7.38 – 7.29 (m, 2H), 5.03 (s, 2H), 3.93 (s, 3H). <sup>13</sup>C NMR (75 MHz, CDCl<sub>3</sub>) δ 166.3, 163.4, 146.0, 137.3, 132.2, 131.3, 130.6, 129.3, 128.3, 127.4, 126.4, 125.2, 52.2, 51.4. HRMS (ESI, *m/z*) calcd for C<sub>16</sub>H<sub>14</sub>NO<sub>3</sub>S [M+H]<sup>+</sup>: 300.0689; found: 300.0693.

### 3-(benzo[d]thiazol-5-yl)-2,3-dihydro-4H-benzo[e][1,3]thiazin-4-one (4j)

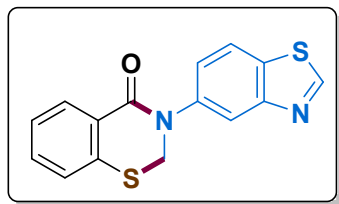

The reaction was performed following the general procedure. The residue was purified by flash column chromatograph (silica gel, petroleum ether:EtOAc = 3:1, v/v) to give the product as a colourless oil (63.4 mg, 71%). <sup>1</sup>H NMR (300 MHz, CDCl<sub>3</sub>) δ 9.03 (s, 1H), 8.19 (d, *J* = 7.8 Hz, 1H), 8.10 (d, *J* = 1.8 Hz, 1H), 7.97 (d, *J* = 8.6 Hz, 1H), 7.52 (dd, *J* = 8.6, 1.9 Hz, 1H), 7.45 – 7.27 (m, 3H), 5.06 (s, 2H). <sup>13</sup>C NMR (75 MHz, CDCl<sub>3</sub>) δ 163.7, 155.4, 153.9, 140.9, 137.4, 132.4, 132.1, 131.2, 129.4, 127.4, 126.4, 124.3, 122.2, 120.3, 51.9. HRMS (ESI, *m/z*) calcd for C<sub>15</sub>H<sub>11</sub>N<sub>2</sub>OS<sub>2</sub> [M+H]<sup>+</sup>: 299.0308; found: 299.0308.

### 3-(2-ethyl-2H-indazol-5-yl)-2,3-dihydro-4H-benzo[e][1,3]thiazin-4-one (4k)

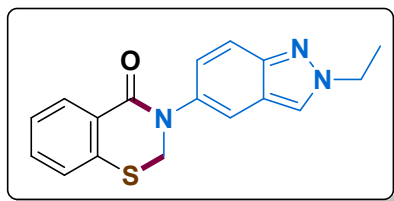

The reaction was performed following the general procedure. The residue was purified by flash column chromatograph (silica gel, petroleum ether:EtOAc = 1:1, v/v) to give the product as a white solid (70.4 mg, 76%). <sup>1</sup>H NMR (300 MHz, CDCl<sub>3</sub>) δ 8.19 (dd, *J* = 7.7, 0.9 Hz, 1H), 7.93 (s, 1H), 7.74 (d, *J* = 9.1 Hz, 1H), 7.62 (d, *J* = 1.2 Hz, 1H), 7.44 – 7.37 (m, 1H), 7.36 – 7.31 (m, 1H), 7.27 (dt, *J* = 6.0, 3.6 Hz, 2H), 4.99 (s, 2H), 4.47 (q, *J* = 7.3 Hz, 2H), 1.62 (t, *J* = 7.3 Hz, 3H). <sup>13</sup>C NMR (75 MHz, CDCl<sub>3</sub>) δ 163.8, 147.2, 137.8, 136.2, 131.8, 131.0, 129.6, 127.2, 126.2, 125.1, 122.6, 121.4, 118.5, 116.9, 51.9, 48.6, 15.8. HRMS (ESI, *m/z*) calcd for C<sub>17</sub>H<sub>16</sub>N<sub>3</sub>OS [M+H]<sup>+</sup>: 310.1009; found: 310.1012.

### 3-(pyridin-2-ylmethyl)-2,3-dihydro-4H-benzo[e][1,3]thiazin-4-one (4l)

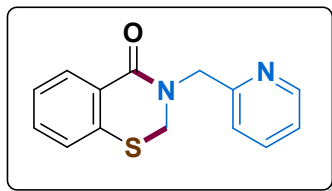

The reaction was performed following the general procedure. The residue was purified by flash column chromatograph (silica gel, petroleum ether:EtOAc = 3:1, v/v) to give the product as a colourless oil (67.5 mg, 88%). <sup>1</sup>H NMR (300 MHz, CDCl<sub>3</sub>) δ 8.54 (d, *J* = 4.2 Hz, 1H), 8.14 (dd, *J* = 8.1, 1.4 Hz, 1H), 7.68 (td, *J* = 7.7, 1.8 Hz, 1H), 7.47 (d, *J* = 7.8 Hz, 1H), 7.40 – 7.30 (m, 1H), 7.30 – 7.27 (m, 1H), 7.26 – 7.19 (m, 2H), 4.96 (s, 2H), 4.71 (s, 2H). <sup>13</sup>C NMR (75 MHz, CDCl<sub>3</sub>) δ 163.9, 156.6, 149.2, 137.2, 137.1, 131.7, 130.8, 129.1, 127.1, 126.1, 122.7, 122.5, 53.2, 48.7. HRMS (ESI, *m/z*) calcd for C<sub>14</sub>H<sub>13</sub>N<sub>2</sub>OS [M+H]<sup>+</sup>: 257.0744; found: 257.0748.

### 3-(thiophen-2-ylmethyl)-2,3-dihydro-4H-benzo[e][1,3]thiazin-4-one (4m)

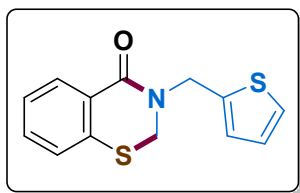

The reaction was performed following the general procedure. The residue was purified by flash column chromatograph (silica gel, petroleum ether:EtOAc = 10:1, v/v) to give the product as a colourless oil (63.4 mg, 81%).

$^1\text{H}$  NMR (300 MHz,  $\text{CDCl}_3$ )  $\delta$  8.16 (d,  $J$  = 7.9 Hz, 1H), 7.39 – 7.31 (m, 1H), 7.27 (dd,  $J$  = 8.4, 1.0 Hz, 2H), 7.25 – 7.22 (m, 1H), 7.07 (d,  $J$  = 2.7 Hz, 1H), 6.96 (dd,  $J$  = 5.0, 3.5 Hz, 1H), 4.99 (s, 2H), 4.55 (s, 2H).  $^{13}\text{C}$  NMR (75 MHz,  $\text{CDCl}_3$ )  $\delta$  163.7, 138.8, 137.0, 131.8, 130.9, 129.1, 127.2, 127.1, 126.9, 126.1, 125.9, 47.6, 45.8. HRMS (ESI,  $m/z$ ) calcd for  $\text{C}_{13}\text{H}_{12}\text{NOS}_2$   $[\text{M}+\text{H}]^+$ : 262.0355; found: 262.0357.

### 3-(furan-2-ylmethyl)-2,3-dihydro-4H-benzo[e][1,3]thiazin-4-one (4n)

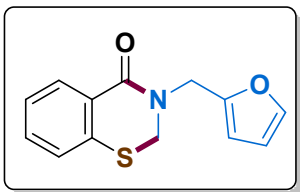

The reaction was performed following the general procedure. The residue was purified by flash column chromatograph (silica gel, petroleum ether:EtOAc = 10:1, v/v) to give the product as a colourless oil solid (63.2 mg,

86%).  $^1\text{H}$  NMR (300 MHz,  $\text{CDCl}_3$ )  $\delta$  8.13 (dd,  $J$  = 8.0, 1.4 Hz, 1H), 7.43 – 7.30 (m, 2H), 7.30 – 7.21 (m, 2H), 6.49 – 6.24 (m, 2H), 4.81 (s, 2H), 4.59 (s, 2H).  $^{13}\text{C}$  NMR (75 MHz,  $\text{CDCl}_3$ )  $\delta$  163.6, 150.0, 142.7, 137.1, 131.7, 130.9, 129.2, 127.1, 126.1, 110.5, 108.9, 47.9, 43.7. HRMS (ESI,  $m/z$ ) calcd for  $\text{C}_{13}\text{H}_{12}\text{NO}_2\text{S}$   $[\text{M}+\text{H}]^+$ : 246.0584; found: 246.0589.

### 3-(2,3-dihydro-1H-inden-1-yl)-2,3-dihydro-4H-benzo[e][1,3]thiazin-4-one (4o)

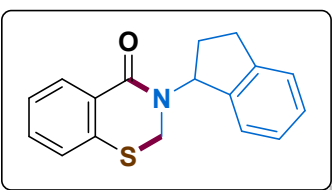

The reaction was performed following the general procedure. The residue was purified by flash column chromatograph (silica gel, petroleum ether:EtOAc = 10:1, v/v) to give the product as a colourless oil (70.8 mg,

84%).  $^1\text{H}$  NMR (300 MHz,  $\text{CDCl}_3$ )  $\delta$  8.19 (d,  $J$  = 7.9 Hz, 1H), 7.39 – 7.32 (m, 2H), 7.27 (dd,  $J$  = 10.1, 6.0 Hz, 5H), 6.40 (t,  $J$  = 8.2 Hz, 1H), 4.41 (d,  $J$  = 12.9 Hz, 1H), 4.21 (d,  $J$  = 12.9 Hz, 1H), 2.99 (qd,  $J$  = 16.0, 10.3 Hz, 2H), 2.67 – 2.51 (m, 1H), 1.96 (dq,  $J$  = 13.3, 8.9 Hz, 1H).  $^{13}\text{C}$  NMR (75 MHz,  $\text{CDCl}_3$ )  $\delta$  164.2, 143.9, 140.4, 137.4, 131.6, 131.0, 129.5, 128.2, 127.1, 127.0, 126.0, 125.1, 124.4, 60.1, 44.2, 30.3, 30.2. HRMS (ESI,  $m/z$ ) calcd for  $\text{C}_{17}\text{H}_{16}\text{NOS}$   $[\text{M}+\text{H}]^+$ : 282.0948; found: 282.0953.



**3-benzyl-2,3-dihydro-4H-benzo[e][1,3]thiazin-4-one (4p) (CAS Number: 2259305-43-4)**

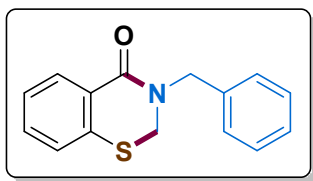

The reaction was performed following the general procedure. The residue was purified by flash column chromatograph (silica gel, petroleum ether:EtOAc = 10:1, v/v) to give the product as a colourless oil (82.3 mg, 90%).

$^1\text{H}$  NMR (300 MHz,  $\text{CDCl}_3$ )  $\delta$  8.23 – 8.12 (m, 1H), 7.39 – 7.33 (m, 4H), 7.32 – 7.27 (m, 2H), 7.26 – 7.21 (m, 2H), 4.85 (s, 2H), 4.46 (s, 2H).  $^{13}\text{C}$  NMR (75 MHz,  $\text{CDCl}_3$ )  $\delta$  163.8, 136.9, 136.2, 131.6, 130.7, 129.1, 128.6, 127.9, 127.6, 127.0, 126.0, 50.9, 47.6.

**3-(naphthalen-1-ylmethyl)-2,3-dihydro-4H-benzo[e][1,3]thiazin-4-one (4q)**

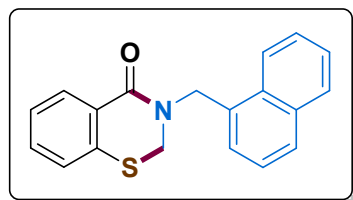

The reaction was performed following the general procedure. The residue was purified by flash column chromatograph (silica gel, petroleum ether:EtOAc = 10:1, v/v) to give the product as a colourless oil (70.3 mg, 77%).  $^1\text{H}$  NMR (300 MHz,  $\text{CDCl}_3$ )  $\delta$  8.23 – 8.20

(m, 1H), 8.09 (d,  $J$  = 7.5 Hz, 1H), 7.89 – 7.77 (m, 2H), 7.56 – 7.45 (m, 3H), 7.45 – 7.39 (m, 1H), 7.36 – 7.24 (m, 2H), 7.20 (dd,  $J$  = 7.4, 1.2 Hz, 1H), 5.29 (s, 2H), 4.40 (s, 2H).  $^{13}\text{C}$  NMR (75 MHz,  $\text{CDCl}_3$ )  $\delta$  163.7, 137.0, 133.8, 131.6, 131.5, 131.4, 130.8, 129.4, 128.9, 128.6, 127.3, 127.1, 126.7, 126.1, 126.0, 125.1, 123.7, 48.6, 46.7. HRMS (ESI,  $m/z$ ) calcd for  $\text{C}_{19}\text{H}_{16}\text{NOS}$   $[\text{M}+\text{H}]^+$ : 306.0948; found: 306.0950.

**3-(3-methoxypropyl)-2,3-dihydro-4H-benzo[e][1,3]thiazin-4-one (4r)**

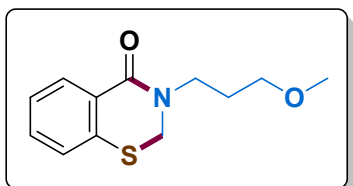

The reaction was performed following the general procedure. The residue was purified by flash column chromatograph (silica gel, petroleum ether:EtOAc = 3:1, v/v) to give the product as a colourless oil (65.4 mg,

92%).  $^1\text{H}$  NMR (300 MHz,  $\text{CDCl}_3$ )  $\delta$  8.10 (d,  $J$  = 8.0 Hz, 1H), 7.35 (dd,  $J$  = 10.2, 4.5 Hz, 1H), 7.27 (dd,  $J$  = 4.1, 3.2 Hz, 2H), 4.61 (s, 2H), 3.71 (t,  $J$  = 6.8 Hz, 2H), 3.50 (t,  $J$  = 6.0 Hz, 2H), 3.35 (s, 3H), 1.98 – 1.90 (m, 2H).  $^{13}\text{C}$  NMR (75 MHz,  $\text{CDCl}_3$ )  $\delta$  163.8, 137.1, 131.4, 130.5, 129.6, 127.0, 126.0, 69.7, 58.6, 49.2, 46.1, 28.1. HRMS (ESI,  $m/z$ ) calcd for  $\text{C}_{12}\text{H}_{16}\text{NO}_2\text{S}$   $[\text{M}+\text{H}]^+$ : 238.0897; found: 238.0899.

### 3-(2-hydroxyethyl)-2,3-dihydro-4H-benzo[e][1,3]thiazin-4-one (4s)

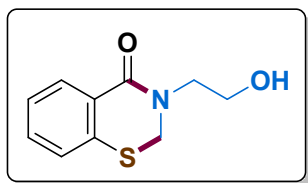

The reaction was performed following the general procedure. The residue was purified by flash column chromatograph (silica gel, petroleum ether:EtOAc = 1:1, v/v) to give the product as a colourless oil (59.6 mg, 95%).

$^1\text{H}$  NMR (300 MHz,  $\text{CDCl}_3$ )  $\delta$  8.03 (d,  $J$  = 7.0 Hz, 1H), 7.42 – 7.16 (m, 3H), 4.66 (s, 2H), 3.79 (dd,  $J$  = 20.5, 4.6 Hz, 4H), 3.44 (s, 1H).  $^{13}\text{C}$  NMR (75 MHz,  $\text{CDCl}_3$ )  $\delta$  164.7, 137.3, 131.7, 130.5, 129.1, 127.2, 126.1, 61.1, 51.4, 50.1. HRMS (ESI,  $m/z$ ) calcd for  $\text{C}_{10}\text{H}_{12}\text{NO}_2\text{S}$   $[\text{M}+\text{H}]^+$ : 210.0584; found: 210.0589.

### 3-octadecyl-2,3-dihydro-4H-benzo[e][1,3]thiazin-4-one (4t)

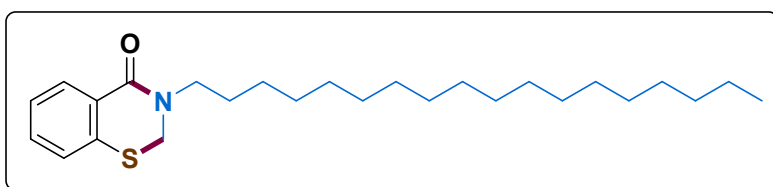

The reaction was performed following the general procedure.

The residue was purified by flash column chromatograph (silica gel, petroleum ether:EtOAc = 10:1, v/v) to give the product as a colourless oil (70.0 mg, 56%).  $^1\text{H}$  NMR (300 MHz,  $\text{CDCl}_3$ )  $\delta$  8.19 – 8.05 (m, 1H), 7.38 – 7.29 (m, 1H), 7.28 – 7.21 (m, 2H), 4.55 (s, 2H), 3.68 – 3.55 (m, 2H), 1.72 – 1.59 (m, 2H), 1.26 (s, 31H), 0.88 (t,  $J$  = 6.6 Hz, 3H).  $^{13}\text{C}$  NMR (75 MHz,  $\text{CDCl}_3$ )  $\delta$  163.5, 137.0, 131.3, 130.6, 129.6, 127.0, 126.0, 48.5, 48.4, 31.9, 29.7, 29.7, 29.6, 29.6, 29.5, 29.4, 28.1, 27.0, 22.7, 14.1. HRMS (ESI,  $m/z$ ) calcd for  $\text{C}_{26}\text{H}_{44}\text{NOS}$   $[\text{M}+\text{H}]^+$ : 418.3139; found: 418.3140.

### 3-((tetrahydro-2H-pyran-4-yl)methyl)-2,3-dihydro-4H-benzo[e][1,3]thiazin-4-one (4u)

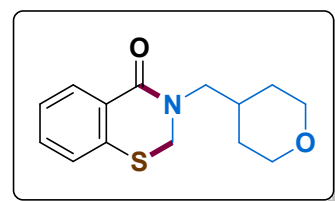

The reaction was performed following the general procedure. The residue was purified by flash column chromatograph (silica gel, petroleum ether:EtOAc = 2:1, v/v) to give the product as a colourless oil (68.6 mg, 87%).

$^1\text{H}$  NMR (300 MHz,  $\text{CDCl}_3$ )  $\delta$  8.09 (dd,  $J$  = 7.3, 2.2 Hz, 1H), 7.41 – 7.29 (m, 1H), 7.27 (d,  $J$  = 5.8 Hz, 2H), 4.57 (s, 2H), 3.97 (dd,  $J$  = 11.3, 3.3 Hz, 2H), 3.50 (d,  $J$  = 7.3 Hz, 2H), 3.36 (td,  $J$  = 11.8, 1.9 Hz, 2H), 2.00 (ddq,  $J$  = 15.0, 7.4, 3.7 Hz, 1H), 1.70 (dd,  $J$  = 12.9, 1.6 Hz, 2H), 1.39 (tt,  $J$  = 12.0, 6.0 Hz, 2H).  $^{13}\text{C}$  NMR (75 MHz,  $\text{CDCl}_3$ )  $\delta$  164.0, 137.0, 131.6, 130.7, 129.5, 127.1, 126.2, 67.6, 54.8, 49.8, 34.5, 30.8. HRMS (ESI,  $m/z$ ) calcd for  $\text{C}_{14}\text{H}_{18}\text{NO}_2\text{S}$   $[\text{M}+\text{H}]^+$ : 264.1053; found: 264.1055.

### 3-(oxetan-3-yl)-2,3-dihydro-4H-benzo[e][1,3]thiazin-4-one (4v)

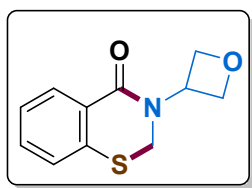

The reaction was performed following the general procedure under 80 °C. The residue was purified by flash column chromatograph (silica gel, petroleum ether:EtOAc = 2:1, v/v) to give the product as a colourless oil (52.3 mg, 79%). <sup>1</sup>H NMR (300 MHz, CDCl<sub>3</sub>) δ 8.08 (d, *J* = 7.8 Hz, 1H), 7.42 – 7.34 (m, 1H), 7.33 – 7.23 (m, 2H), 5.79 – 5.65 (m, 1H), 4.99 (t, *J* = 7.5 Hz, 2H), 4.86 (s, 2H), 4.74 (t, *J* = 6.7 Hz, 2H). <sup>13</sup>C NMR (75 MHz, CDCl<sub>3</sub>) δ 163.6, 137.1, 131.9, 130.9, 128.9, 127.2, 126.2, 75.9, 49.4, 44.2. HRMS (ESI, *m/z*) calcd for C<sub>11</sub>H<sub>12</sub>NO<sub>2</sub>S [M+H]<sup>+</sup>: 222.0584; found: 222.0590.

### 2-(4-oxo-2H-benzo[e][1,3]thiazin-3(4H)-yl)ethyl 2-(1-(4-chlorobenzoyl)-5-methoxy-2-methyl-1H-indol-3-yl)acetate (5)

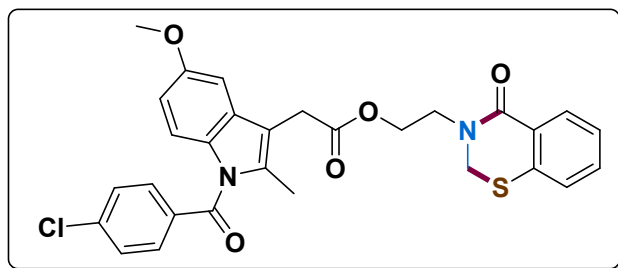

To a sealed tube, **4s** (40.2 mg, 0.2 mmol), Indometacin (85 mg, 0.24 mmol), DCC (82 mg, 0.4 mmol), 4-DMAP (12.2 mg, 0.1 mmol) CH<sub>2</sub>Cl<sub>2</sub> (2 mL) were added. Then, the mixture was stirred at RT for about 12 h. Upon completion of the reaction, the solvent was evaporated under reduced pressure and the residue was purified by flash column chromatograph (silica gel, petroleum ether:EtOAc = 1:1, v/v) to give the desired **5** as white solid (101.9 mg, 93%). <sup>1</sup>H NMR (300 MHz, CDCl<sub>3</sub>) δ 8.04 (dd, *J* = 7.7, 1.1 Hz, 1H), 7.65 (d, *J* = 8.5 Hz, 2H), 7.45 (d, *J* = 8.5 Hz, 2H), 7.34 (td, *J* = 7.5, 1.5 Hz, 1H), 7.26 – 7.17 (m, 2H), 6.94 (d, *J* = 2.4 Hz, 1H), 6.83 (d, *J* = 9.0 Hz, 1H), 6.62 (dd, *J* = 9.0, 2.4 Hz, 1H), 4.35 (t, *J* = 5.1 Hz, 2H), 4.28 (s, 2H), 3.82 (d, *J* = 5.2 Hz, 2H), 3.79 (s, 3H), 3.70 (s, 2H), 2.37 (s, 3H). <sup>13</sup>C NMR (75 MHz, CDCl<sub>3</sub>) δ 170.4, 168.1, 163.8, 156.0, 139.2, 137.0, 135.9, 133.8, 131.7, 131.1, 130.7, 130.6, 130.5, 129.7, 127.0, 127.0, 126.1, 115.0, 112.2, 111.6, 101.2, 63.4, 55.7, 49.5, 47.4, 30.3, 13.3. HRMS (ESI, *m/z*) calcd for C<sub>29</sub>H<sub>26</sub>ClN<sub>2</sub>O<sub>5</sub>S [M+H]<sup>+</sup>: 549.1246; found: 549.1248.

**2-(4-oxo-2H-benzo[e][1,3]thiazin-3(4H)-yl)ethyl(S)-4-  
((5S,8R,9S,10S,13R,14S,17R)-10,13-dimethyl-3,7,12-trioxohexadecahydro-1H-  
cyclopenta[a]phenanthren-17-yl)pentanoate (6)**

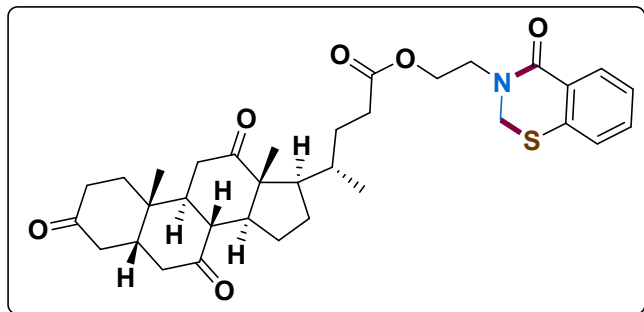

To a sealed tube, **4s** (40.2 mg, 0.2 mmol), Dehydrocholic acid (96.5 mg, 0.24 mmol), DCC (82 mg, 0.4 mmol), 4-DMAP (12.2 mg, 0.1 mmol) CH<sub>2</sub>Cl<sub>2</sub> (2 mL) were added. Then, the mixture was stirred at RT for about 12 h.

Upon completion of the reaction, the solvent was evaporated under reduced pressure and the residue was purified by flash column chromatograph (silica gel, petroleum ether:EtOAc = 1:1, v/v) to give the desired **6** as white solid (104.4 mg, 88%). <sup>1</sup>H NMR (300 MHz, CDCl<sub>3</sub>) δ 8.10 (d, *J* = 8.0 Hz, 1H), 7.38 (dd, *J* = 10.5, 4.2 Hz, 1H), 7.33 – 7.27 (m, 2H), 4.68 (s, 2H), 4.33 (t, *J* = 5.3 Hz, 2H), 3.90 (t, *J* = 5.3 Hz, 2H), 2.99 – 2.80 (m, 3H), 2.37 (ddd, *J* = 16.5, 11.0, 4.8 Hz, 4H), 2.26 (d, *J* = 3.1 Hz, 2H), 2.21 – 2.18 (m, 1H), 2.12 (d, *J* = 5.4 Hz, 1H), 2.03 (d, *J* = 12.8 Hz, 3H), 1.93 (d, *J* = 14.9 Hz, 2H), 1.84 (dd, *J* = 14.4, 7.3 Hz, 2H), 1.75 – 1.55 (m, 3H), 1.41 (s, 3H), 1.33 – 1.24 (m, 3H), 1.07 (s, 3H), 0.85 (d, *J* = 6.4 Hz, 3H). <sup>13</sup>C NMR (75 MHz, CDCl<sub>3</sub>) δ 211.8, 208.9, 208.6, 173.6, 163.8, 137.1, 131.6, 130.6, 129.1, 127.1, 126.1, 62.5, 56.8, 51.7, 49.8, 48.8, 47.4, 46.7, 45.5, 44.9, 42.7, 38.5, 36.4, 35.9, 35.3, 33.8, 31.3, 30.3, 27.5, 25.5, 24.8, 21.8, 18.6, 11.7. HRMS (ESI, *m/z*) calcd for C<sub>34</sub>H<sub>44</sub>NO<sub>6</sub>S [M+H]<sup>+</sup>: 594.2884; found: 594.2887.

**3-benzyl-2,3-dihydro-4H-benzo[e][1,3]thiazin-4-one 1,1-dioxide (7)**

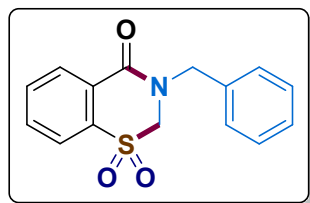

CH<sub>2</sub>Cl<sub>2</sub> (2 mL) was added to a mixture of 3-benzyl-2,3-dihydro-4H-benzo[e][1,3]thiazin-4-one **4p** (51mg, 0.2 mmol), *m*-CPBA (104 mg, 0.6 mmol) in a sealed tube. Then, the mixture was stirred at RT for about 12 h. Upon completion of the reaction, the solvent was evaporated

under reduced pressure and the residue was purified by flash column chromatograph (silica gel, petroleum ether:EtOAc = 10:1, v/v) to give the desired **7** as white solid (42.4 mg, 74%). <sup>1</sup>H NMR (300 MHz, CDCl<sub>3</sub>) δ 8.18 (dd, *J* = 7.4, 1.5 Hz, 1H), 7.81 – 7.75 (m, 1H), 7.71 – 7.58 (m, 2H), 7.36 – 7.11 (m, 5H), 4.83 (s, 2H), 4.51 (s, 2H). <sup>13</sup>C NMR (75 MHz, CDCl<sub>3</sub>) δ 161.2, 137.9, 134.5, 133.6, 133.0, 130.9, 128.9, 128.4, 128.2, 127.9, 122.1, 64.7, 52.0. HRMS (ESI, *m/z*) calcd for C<sub>15</sub>H<sub>14</sub>NO<sub>3</sub>S [M+H]<sup>+</sup>: 288.0689; found: 288.0689.

## 7. NMR spectroscopic data for the products

### 3,5-dimethyl-2,3,4,5-tetrahydro-6H-benzo[g][1,3,5]thiadiazocin-6-one (3a)

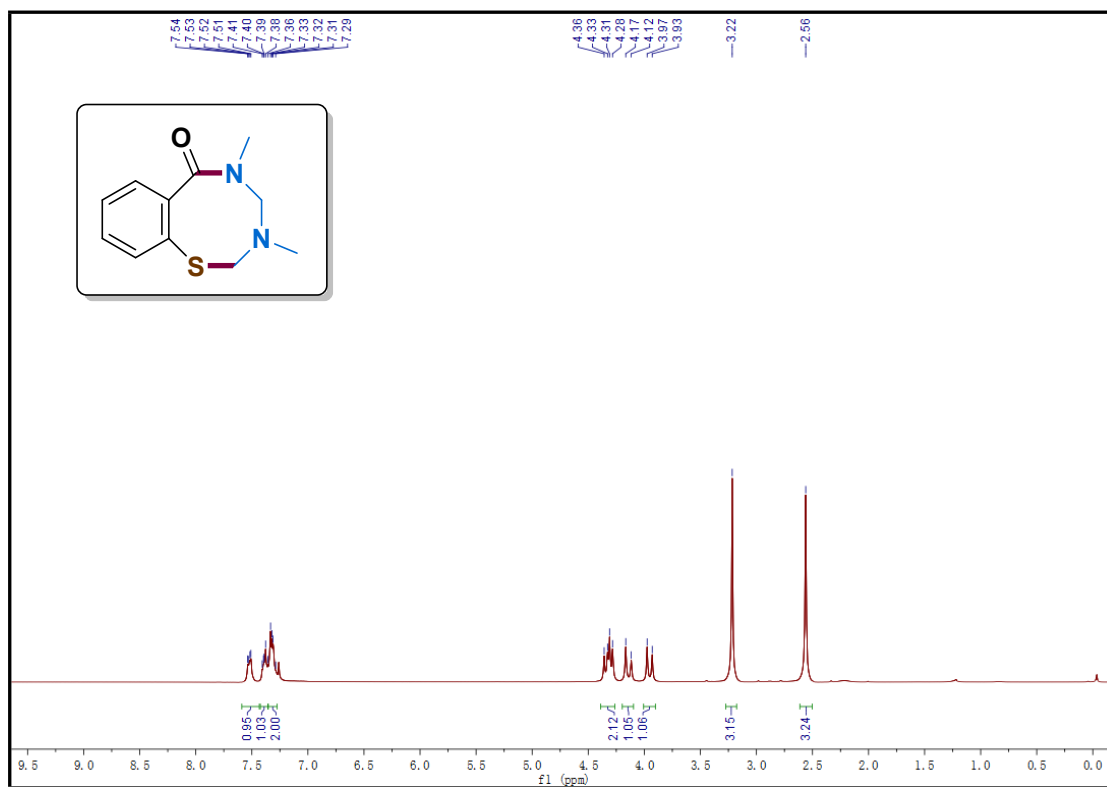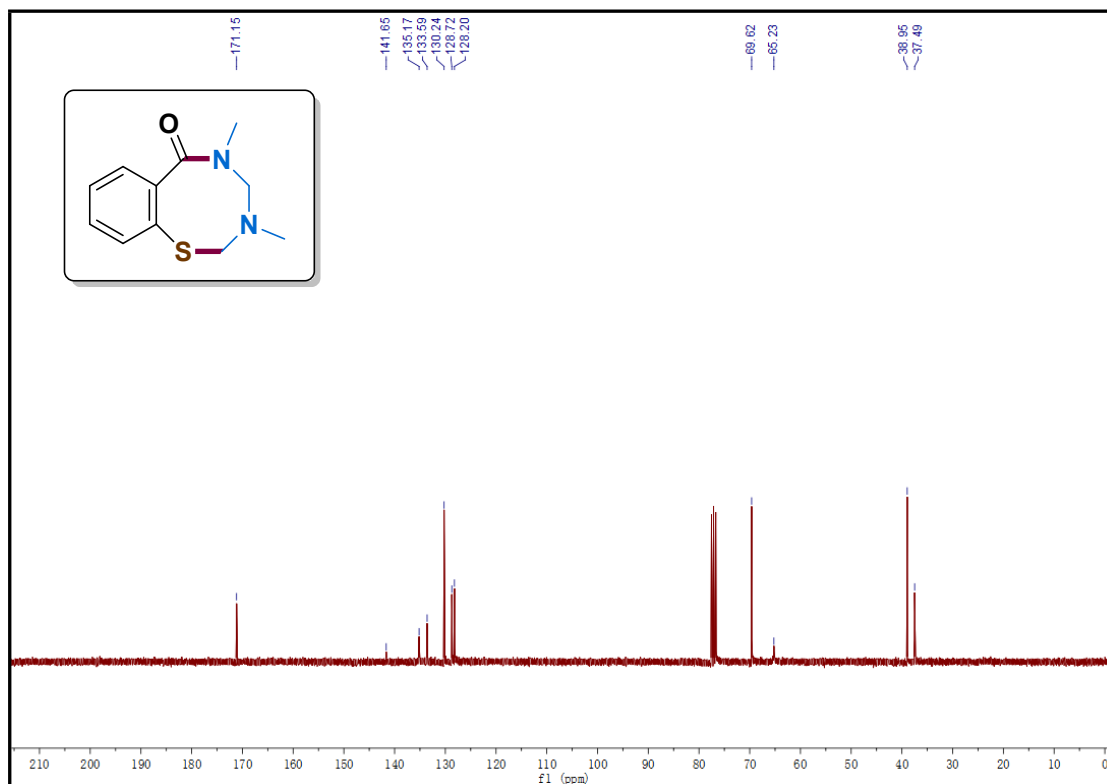

**3,5-dimethyl-8-morpholino-2,3,4,5-tetrahydro-6H-benzo[g][1,3,5]thiadiazocin-6-one (3b)**

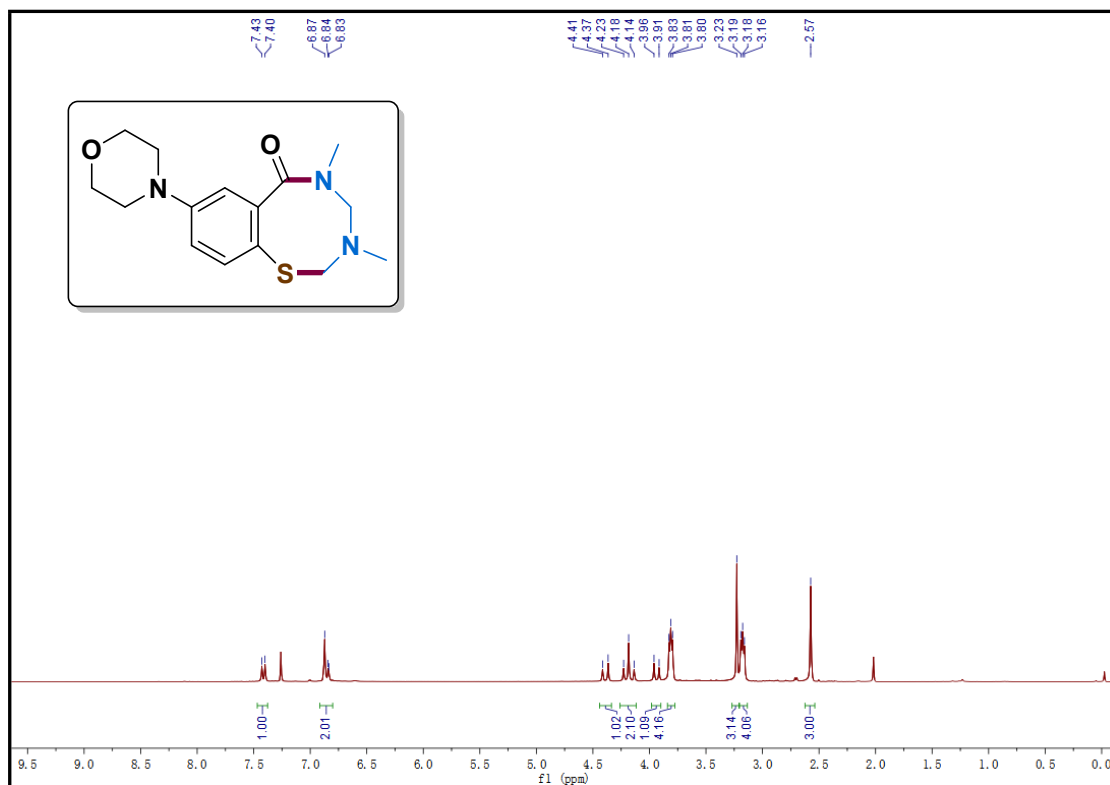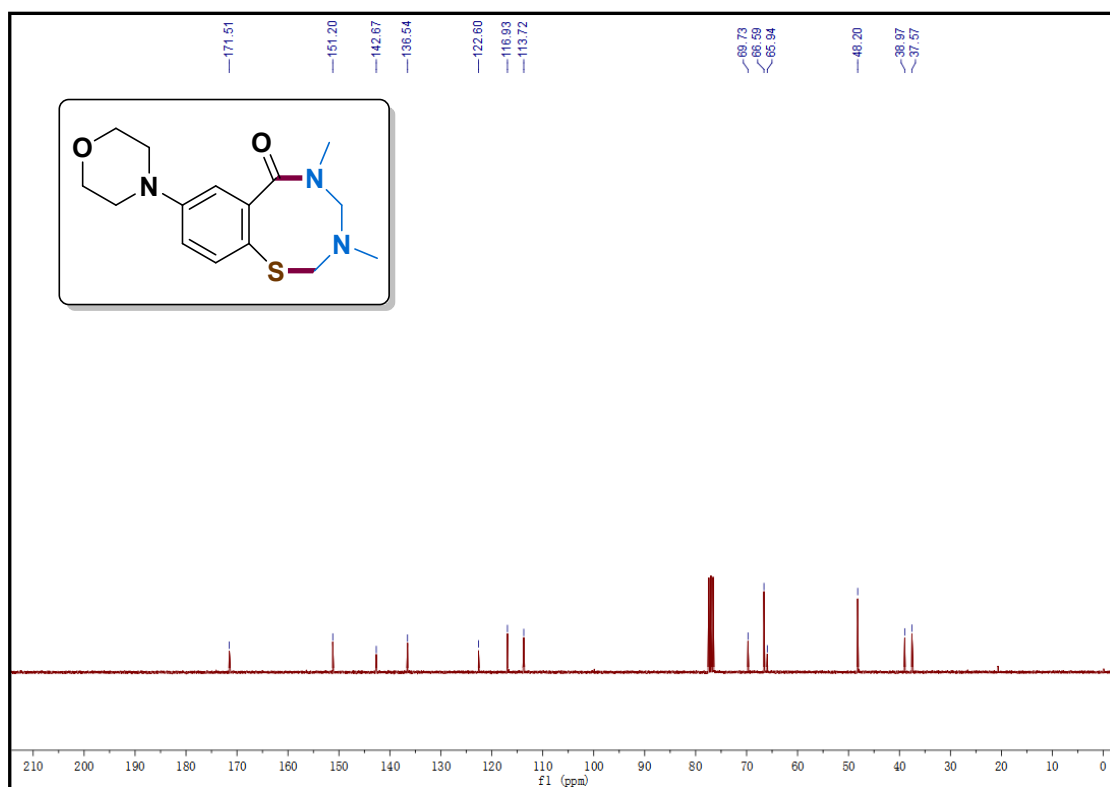

**3,5,8-trimethyl-2,3,4,5-tetrahydro-6H-benzo[g][1,3,5]thiadiazocin-6-one (3c)**

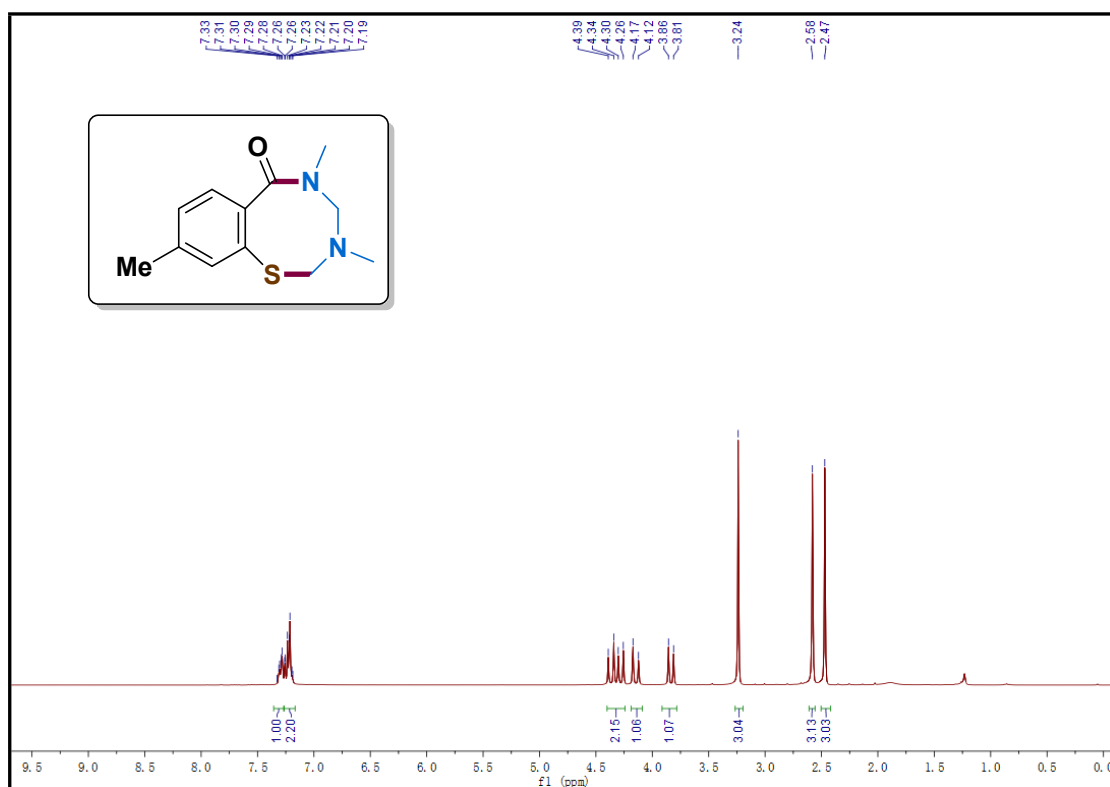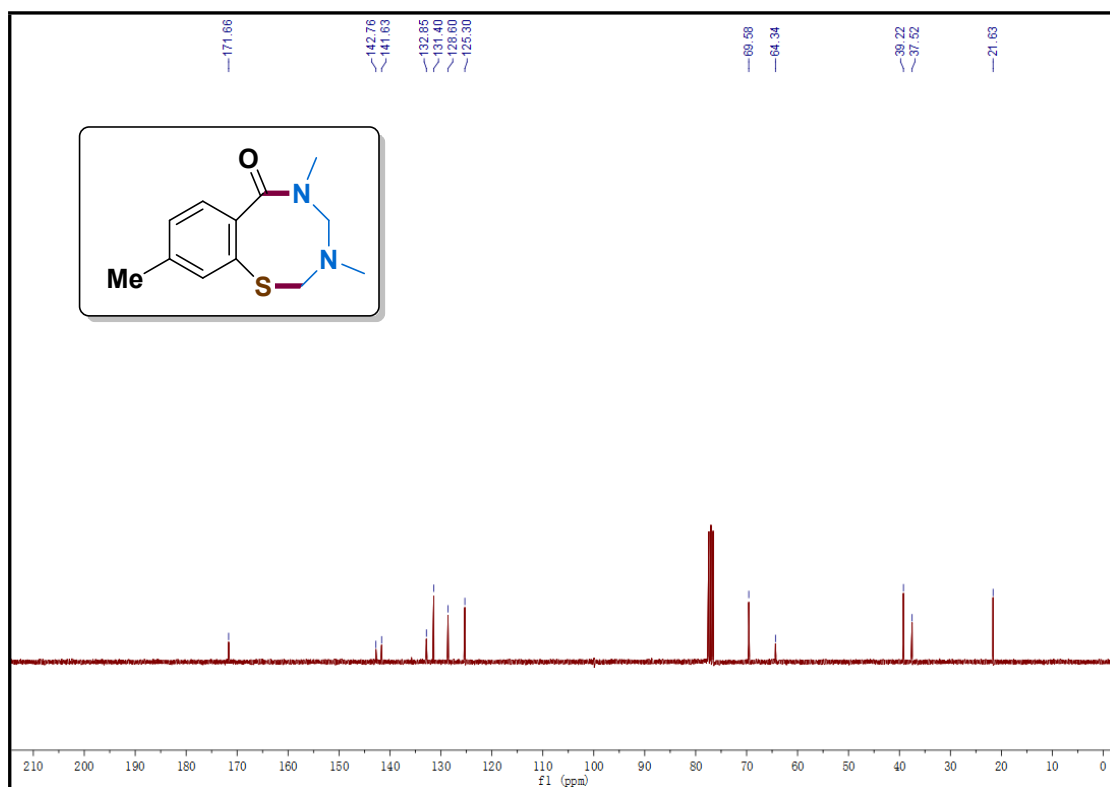

**3,5-dimethyl-8-(4-((1s,4r)-4-propylcyclohexyl)phenyl)-2,3,4,5-tetrahydro-6H-benzo[g][1,3,5]thiadiazocin-6-one (3d)**

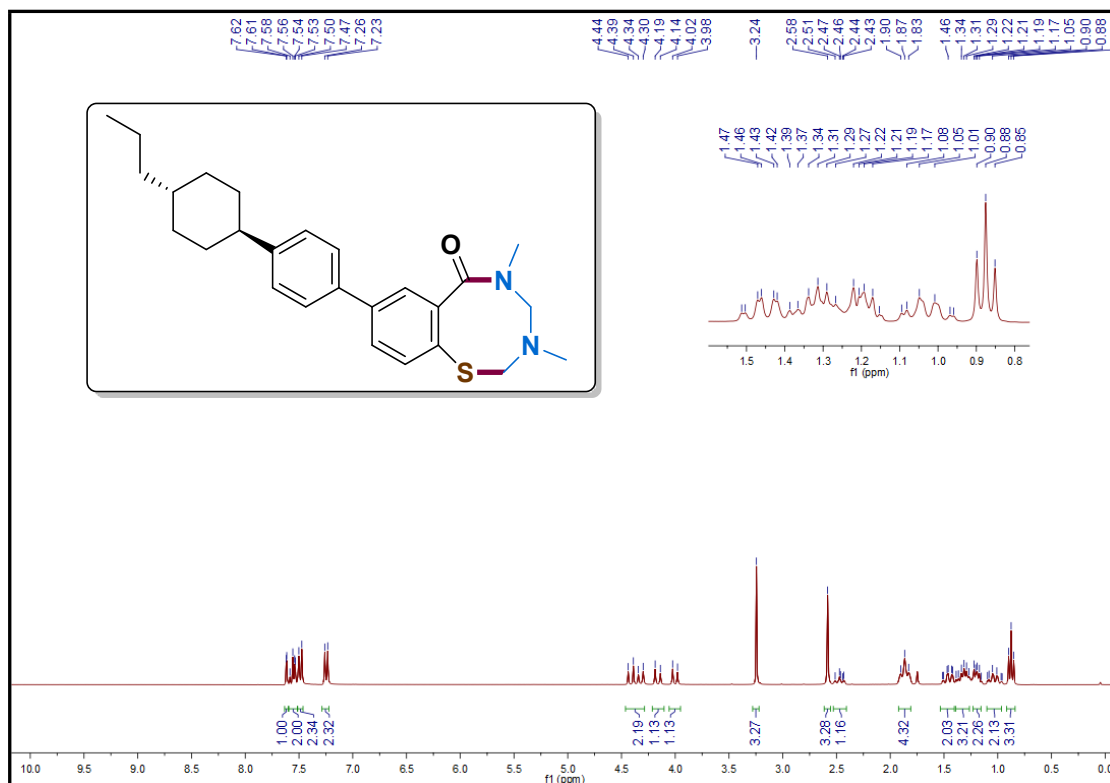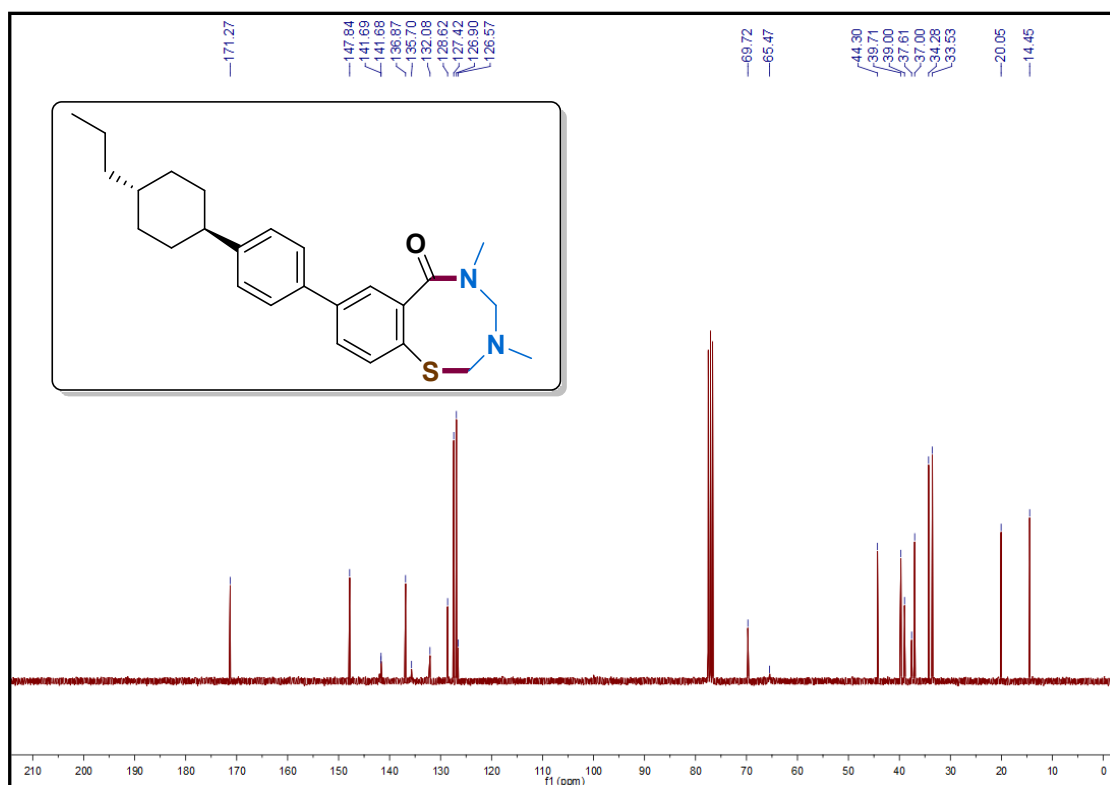



**3,5-dimethyl-8-(naphthalen-2-yl)-2,3,4,5-tetrahydro-6H-benzo[g][1,3,5]thiadiazocin-6-one (3e)**

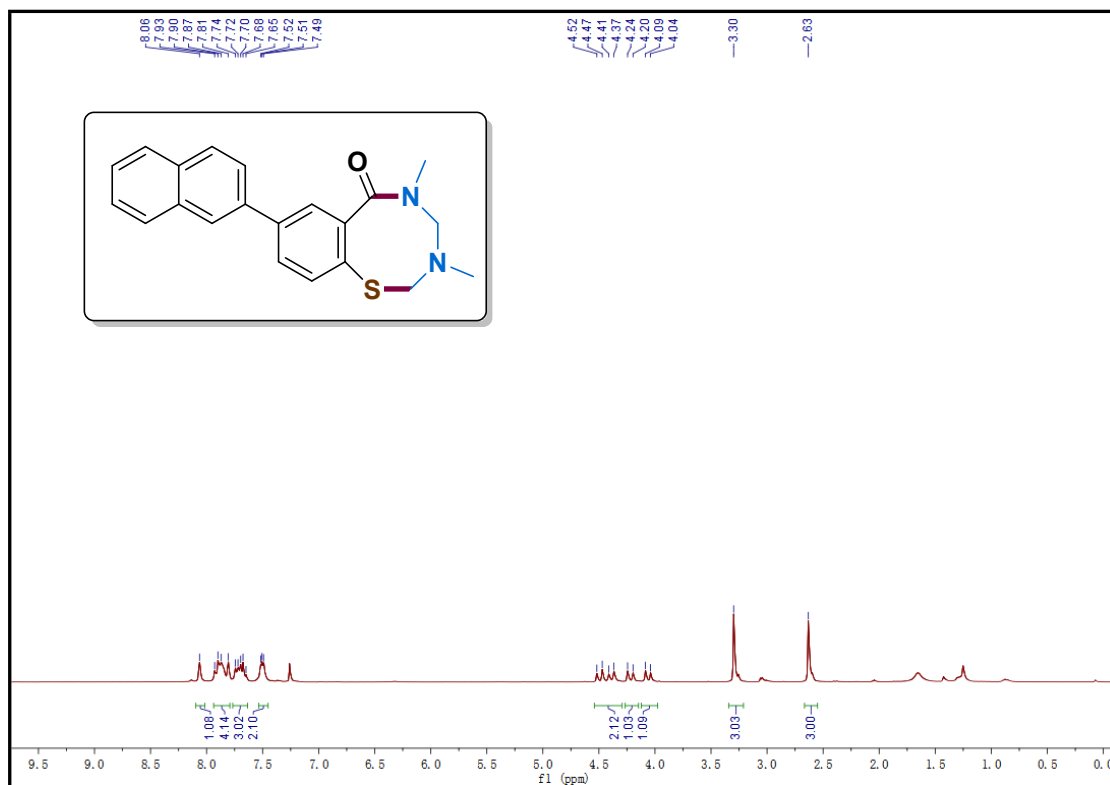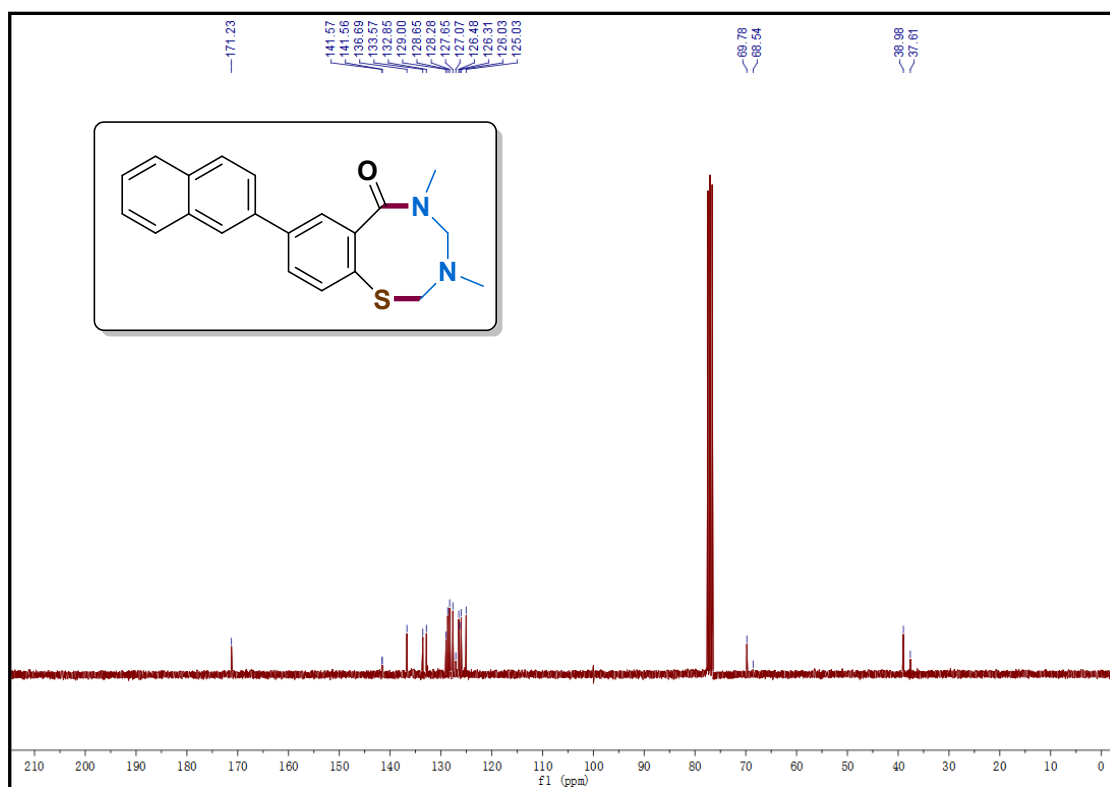

7-fluoro-3,5-dimethyl-2,3,4,5-tetrahydro-6H-benzo[g][1,3,5]thiadiazocin-6-one

(3f)

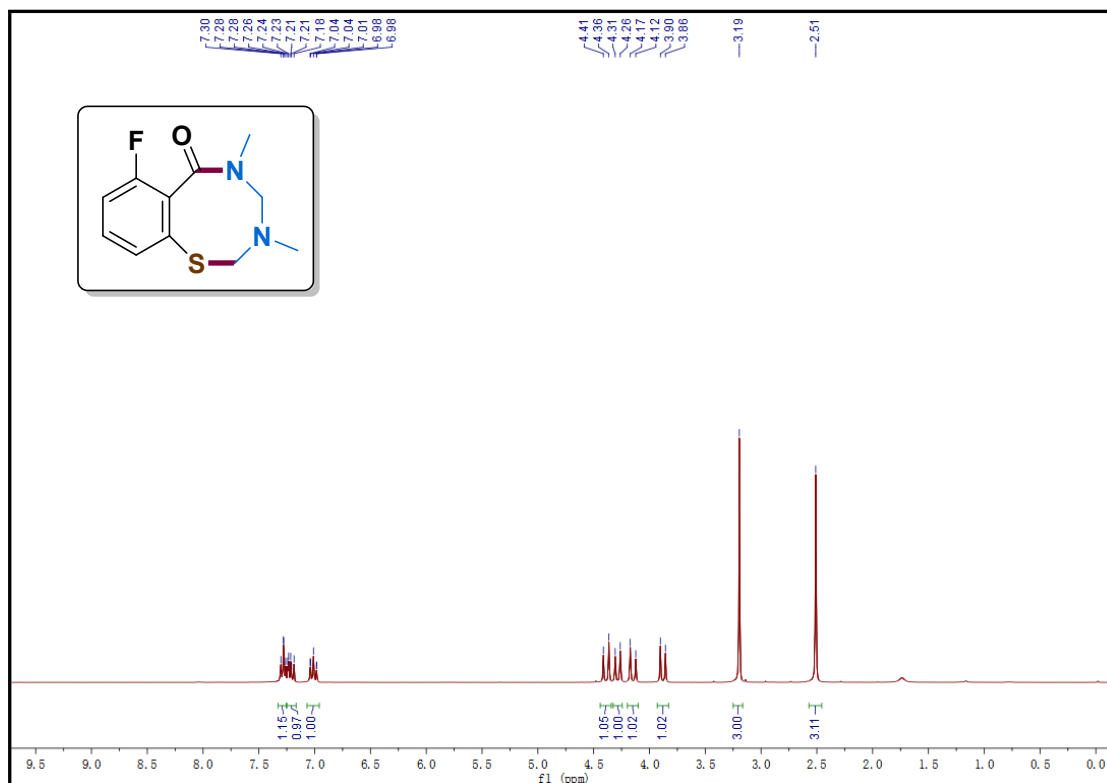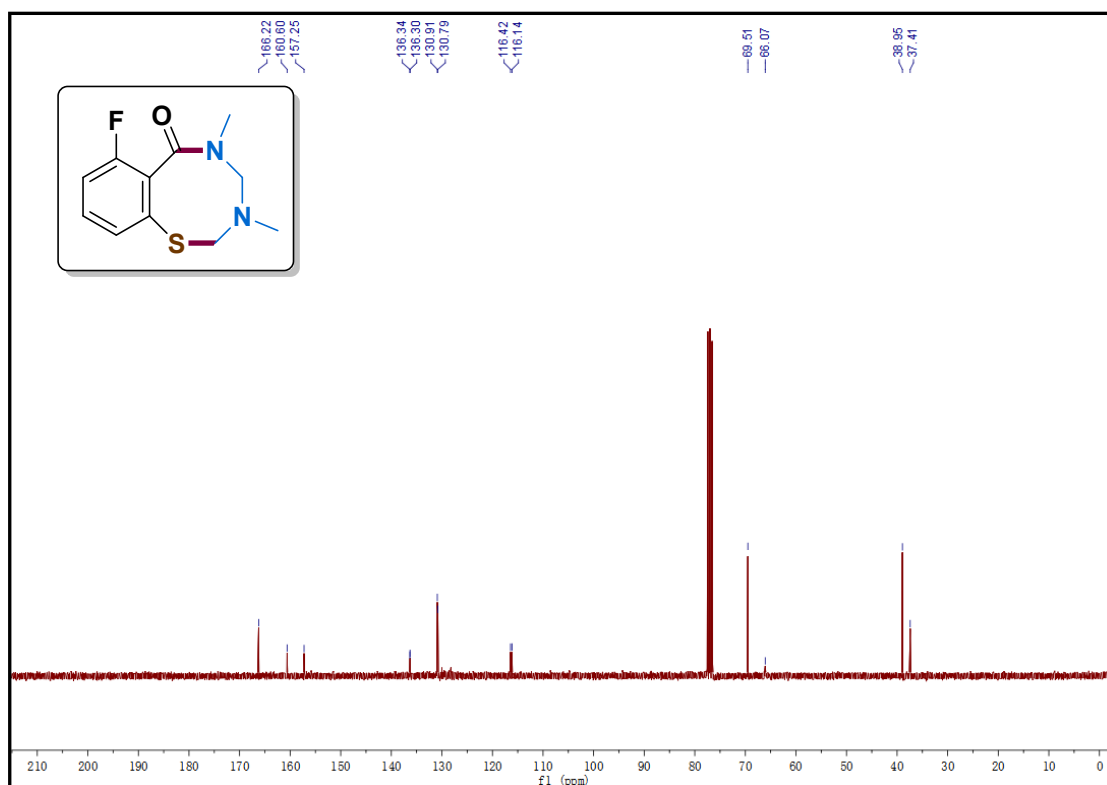

8-fluoro-3,5-dimethyl-2,3,4,5-tetrahydro-6H-benzo[g][1,3,5]thiadiazocin-6-one

(3g)

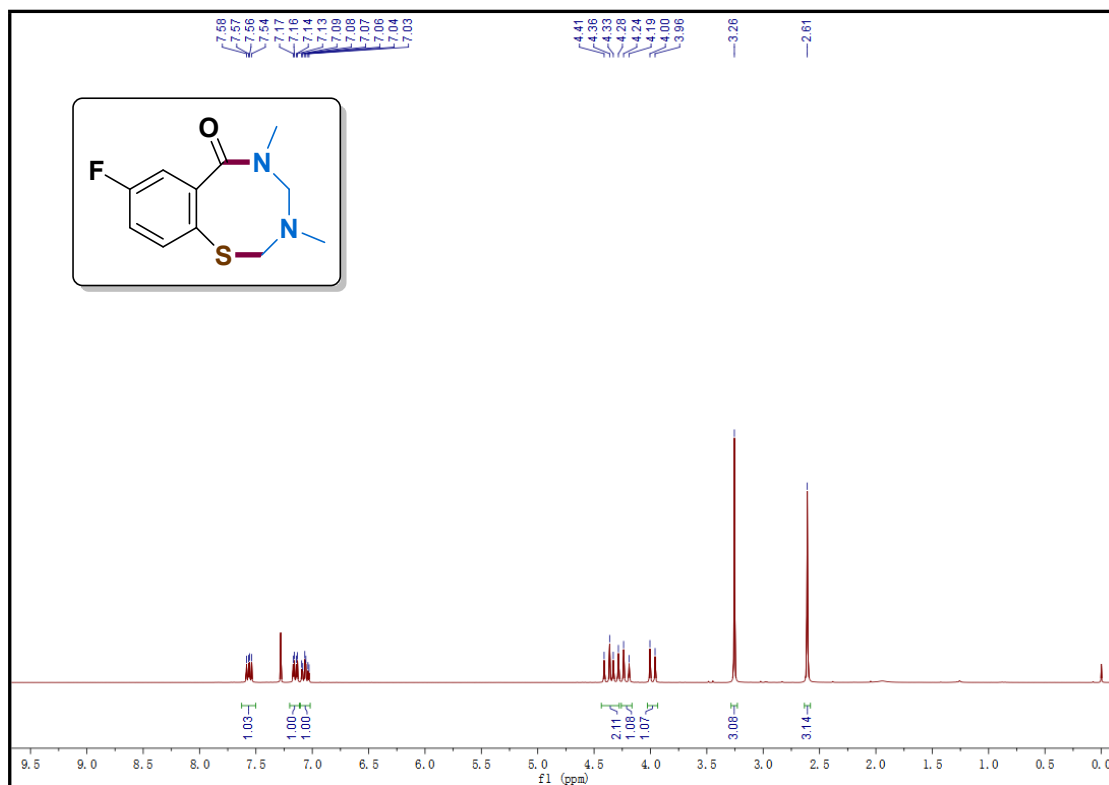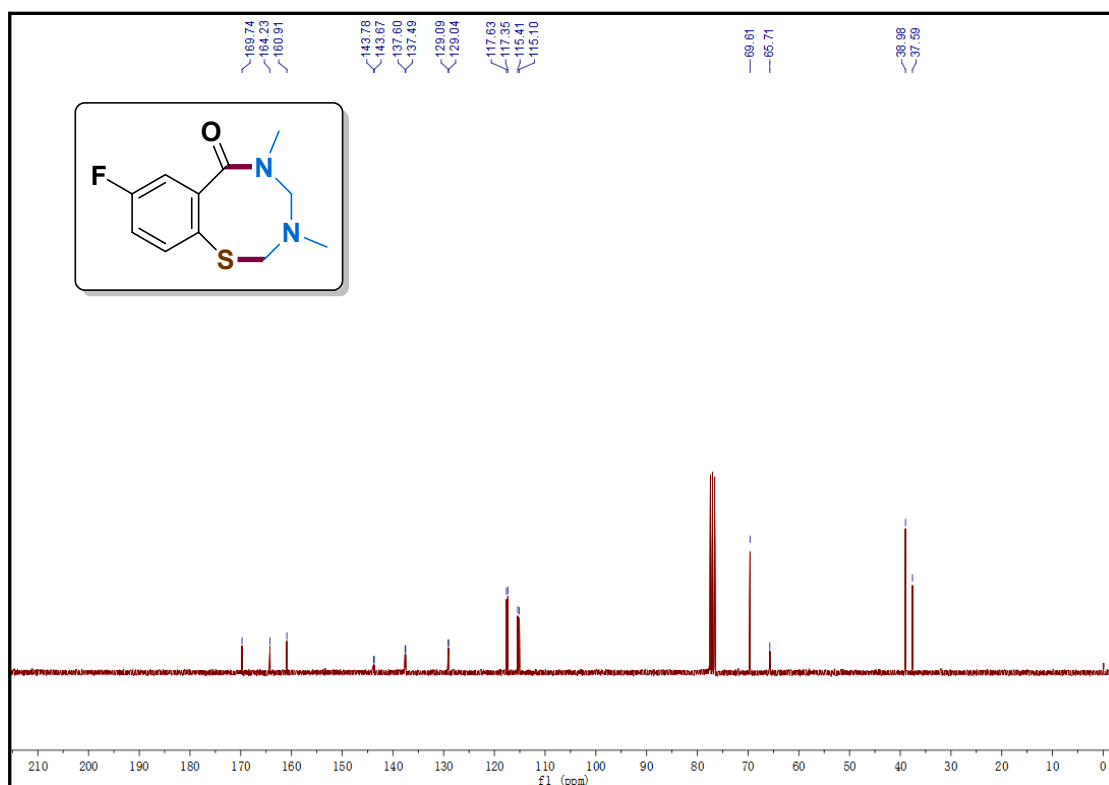

**8-chloro-3,5-dimethyl-2,3,4,5-tetrahydro-6H-benzo[g][1,3,5]thiadiazocin-6-one  
(3h)**

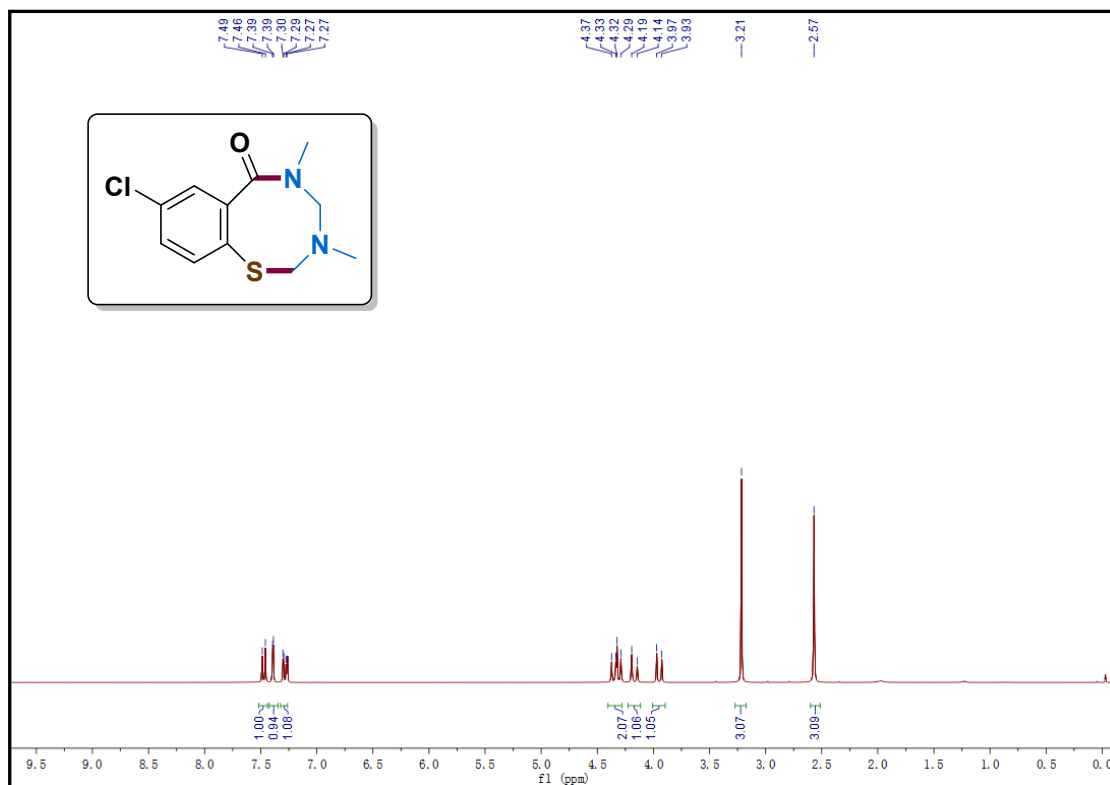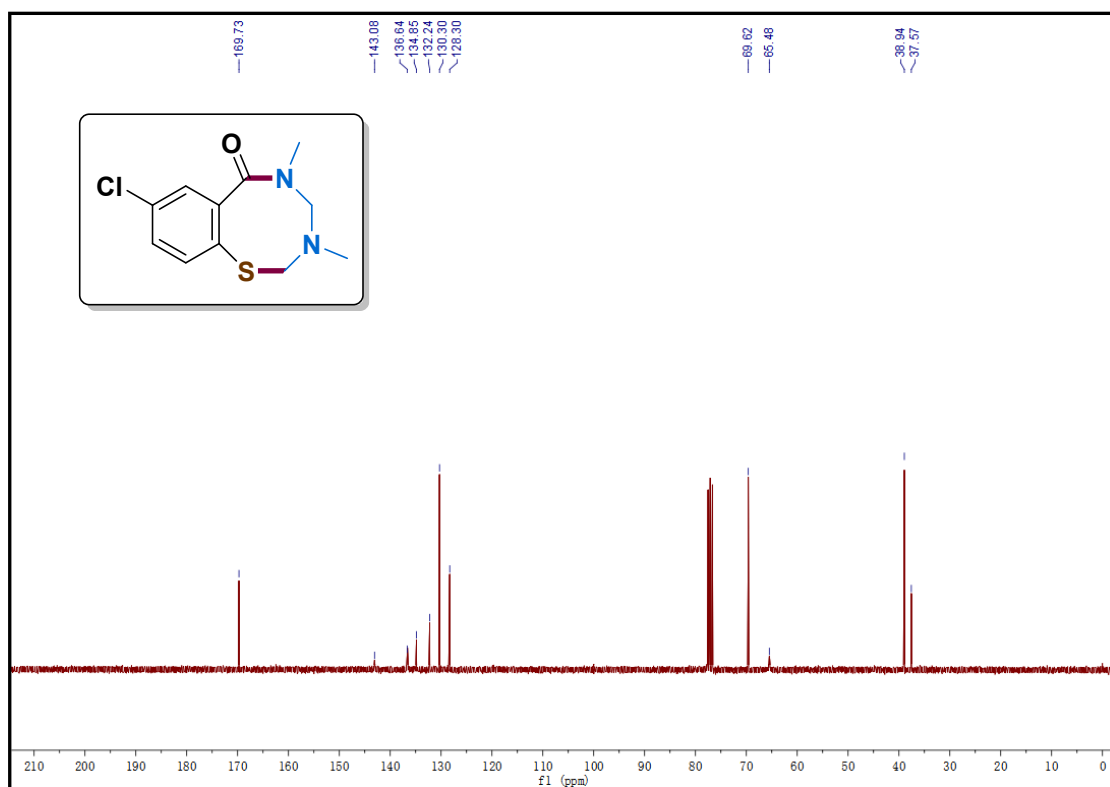

9-chloro-3,5-dimethyl-2,3,4,5-tetrahydro-6H-benzo[g][1,3,5]thiadiazocin-6-one

(3i)

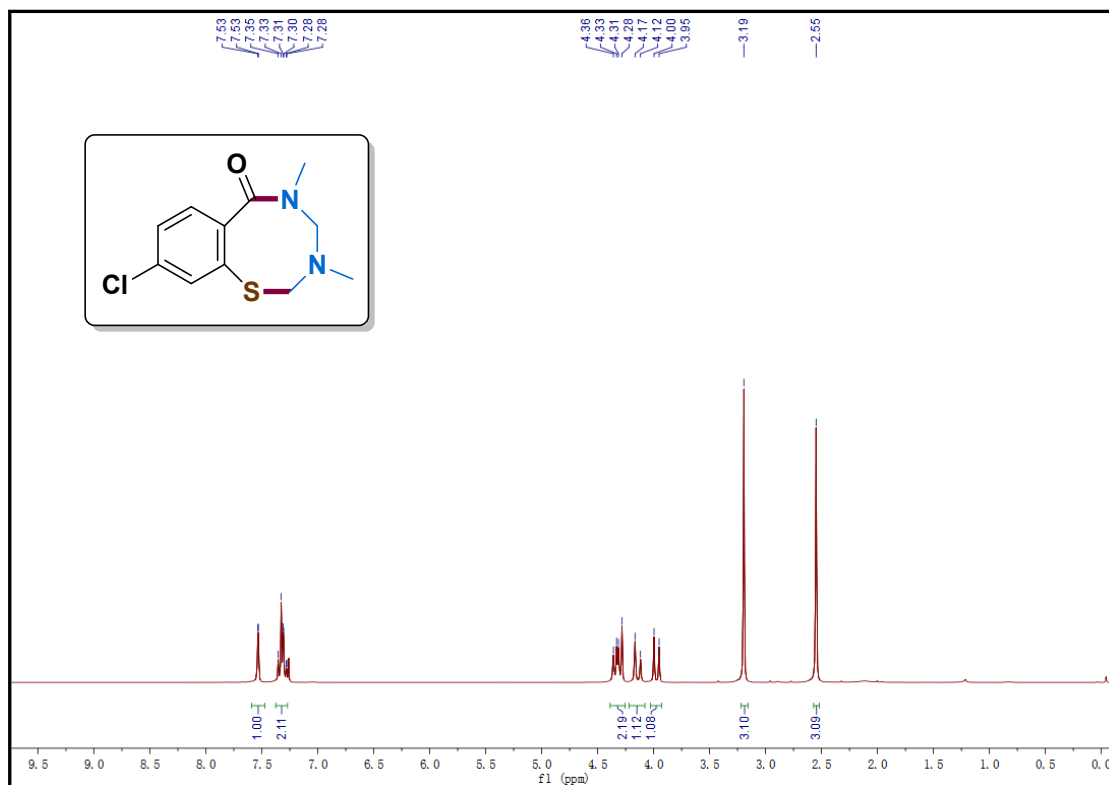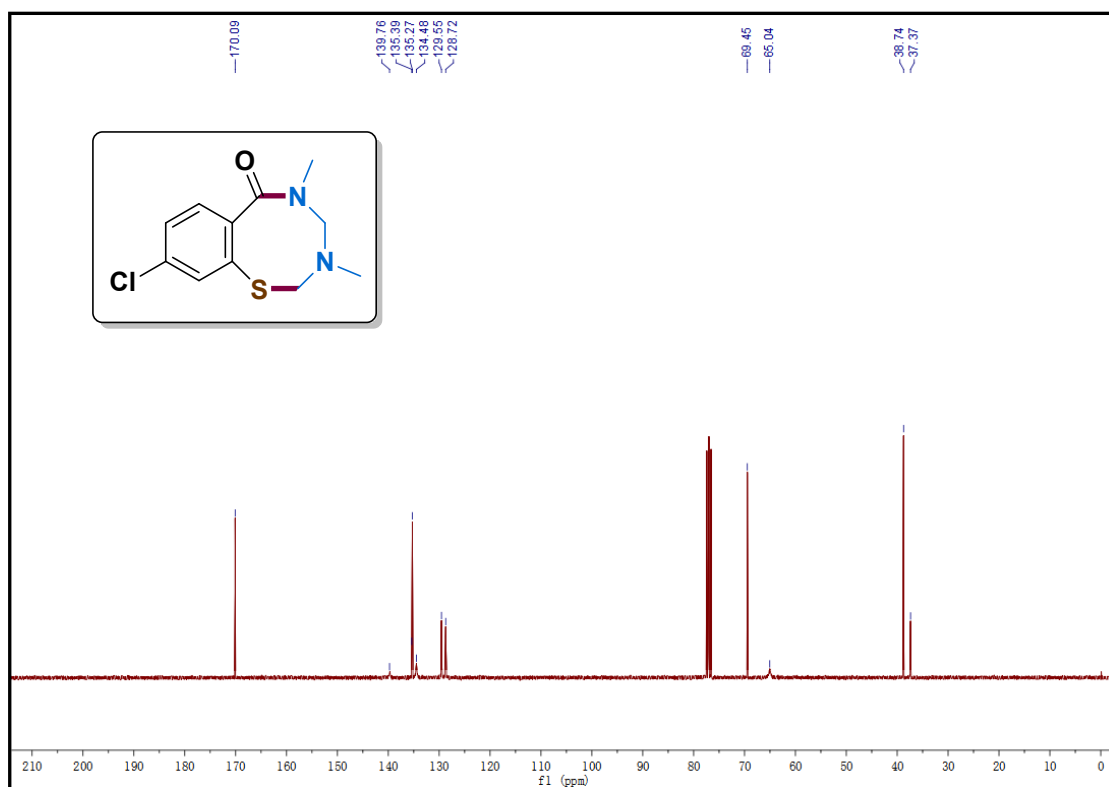

8-bromo-3,5-dimethyl-2,3,4,5-tetrahydro-6H-benzo[g][1,3,5]thiadiazocin-6-one

(3j)

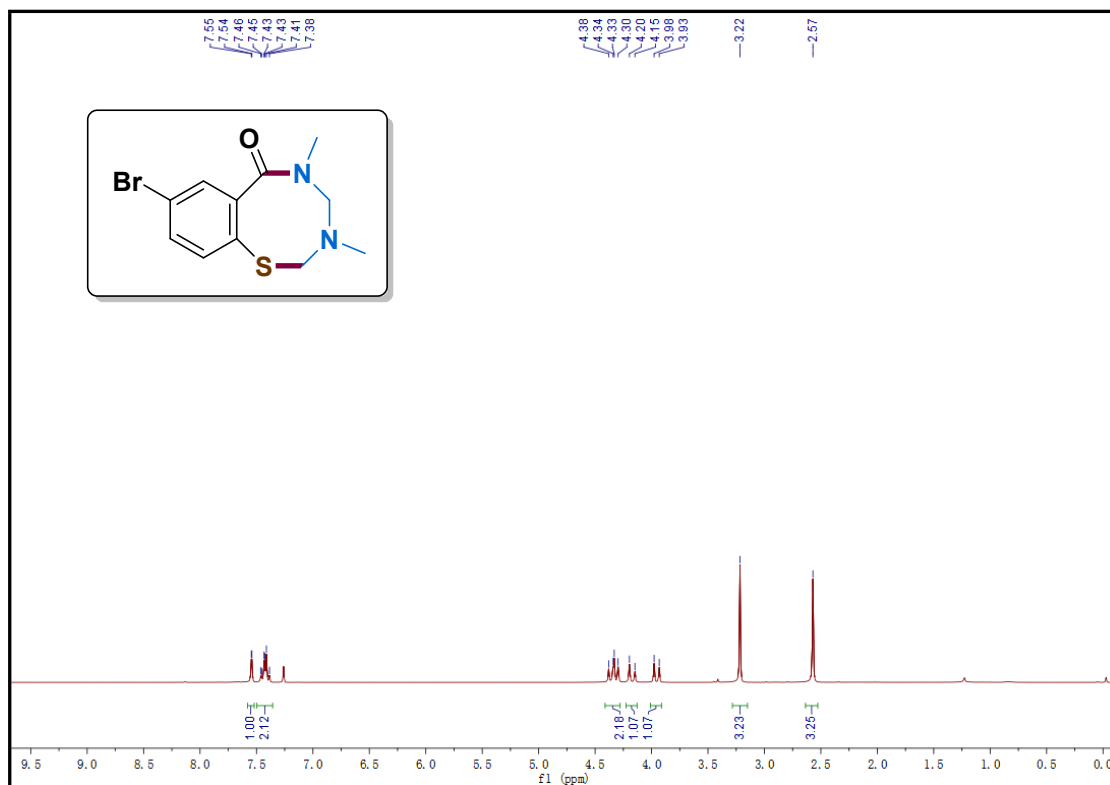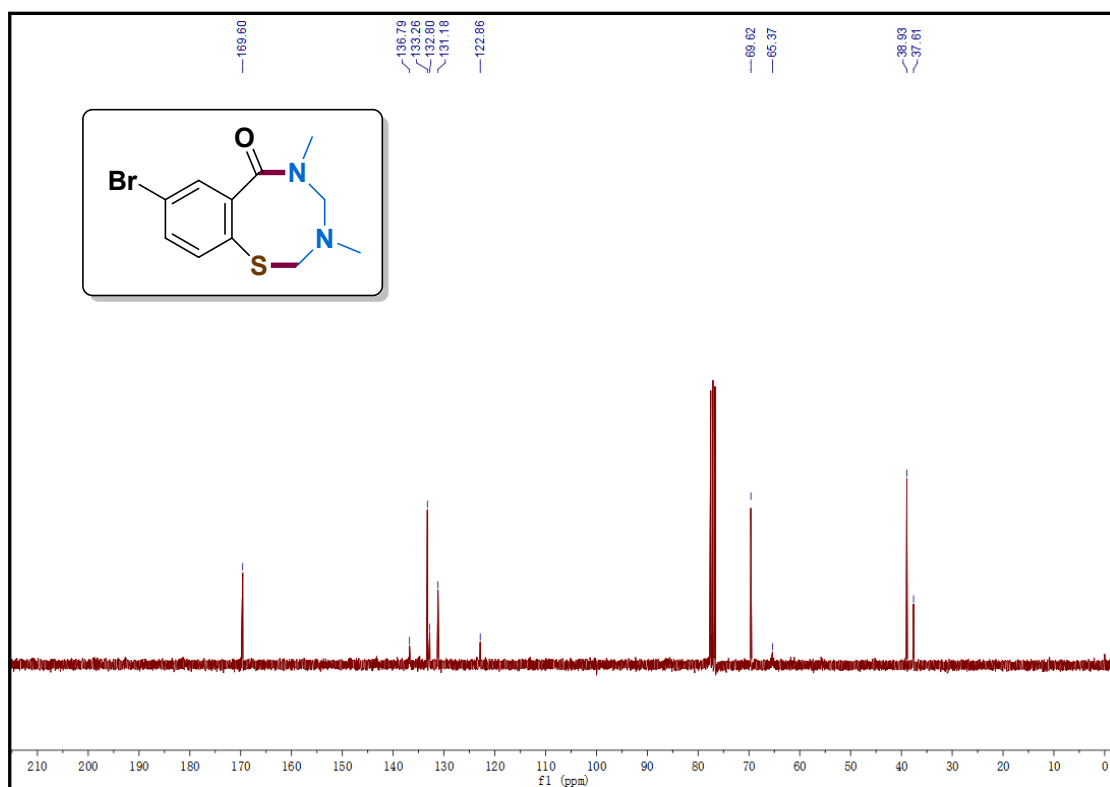

**3,5-dimethyl-8-(trifluoromethyl)-2,3,4,5-tetrahydro-6H-benzo[g][1,3,5]thiadiazocin-6-one (3k)**

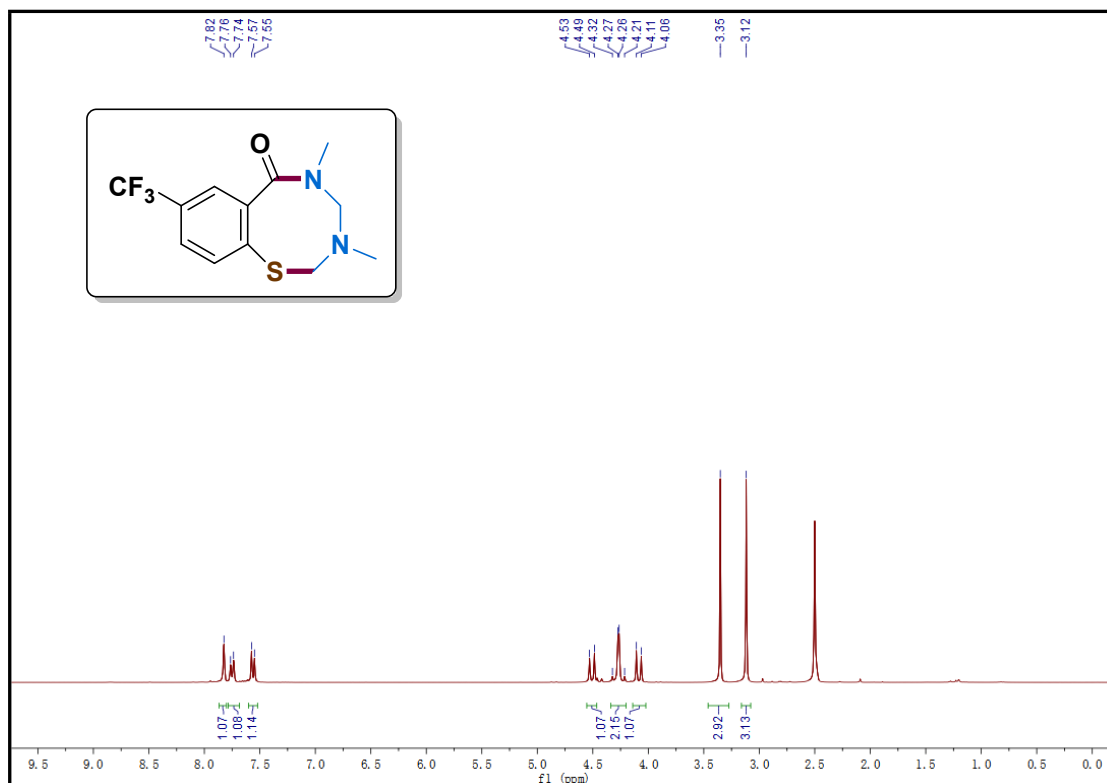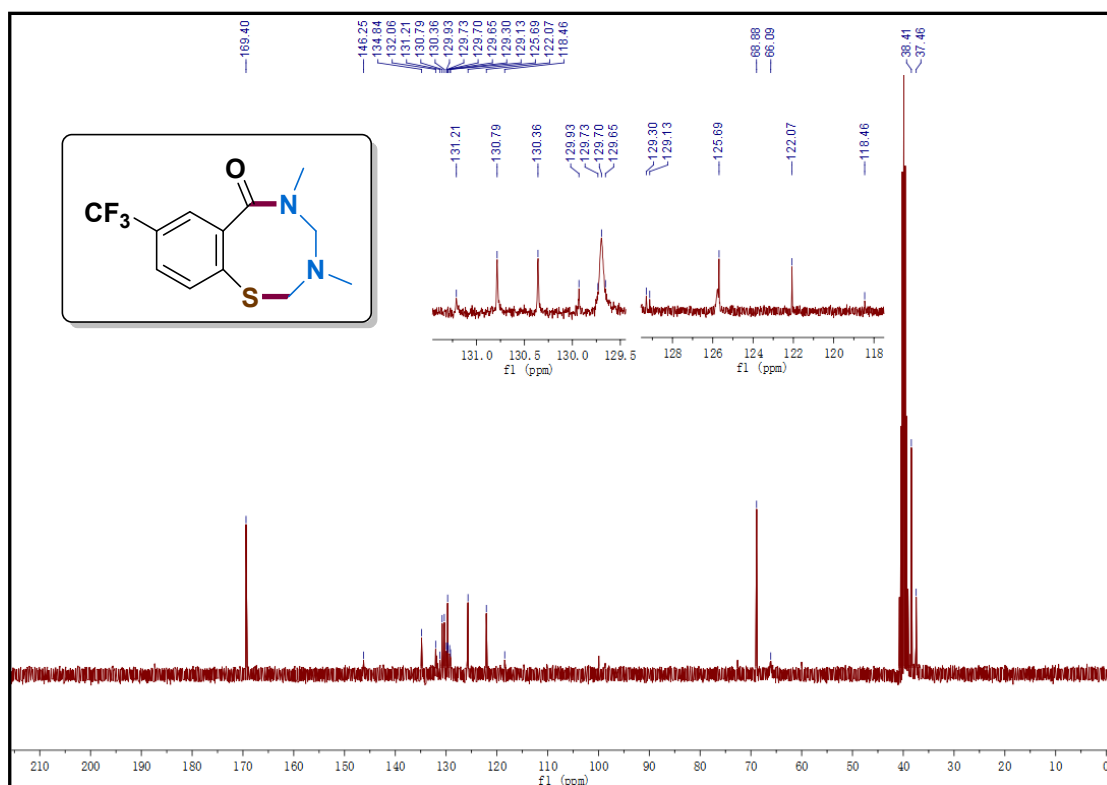

**9-bromo-7-fluoro-3,5-dimethyl-2,3,4,5-tetrahydro-6H-benzo[g][1,3,5]thiadiazocin-6-one (3l)**

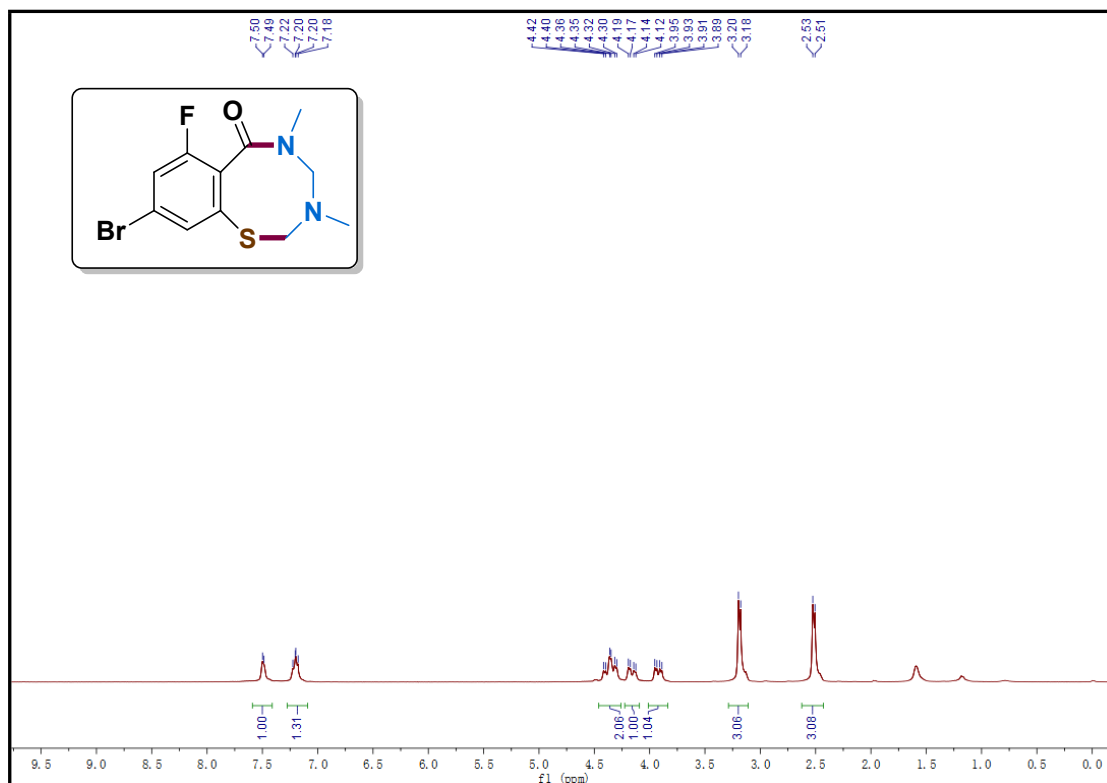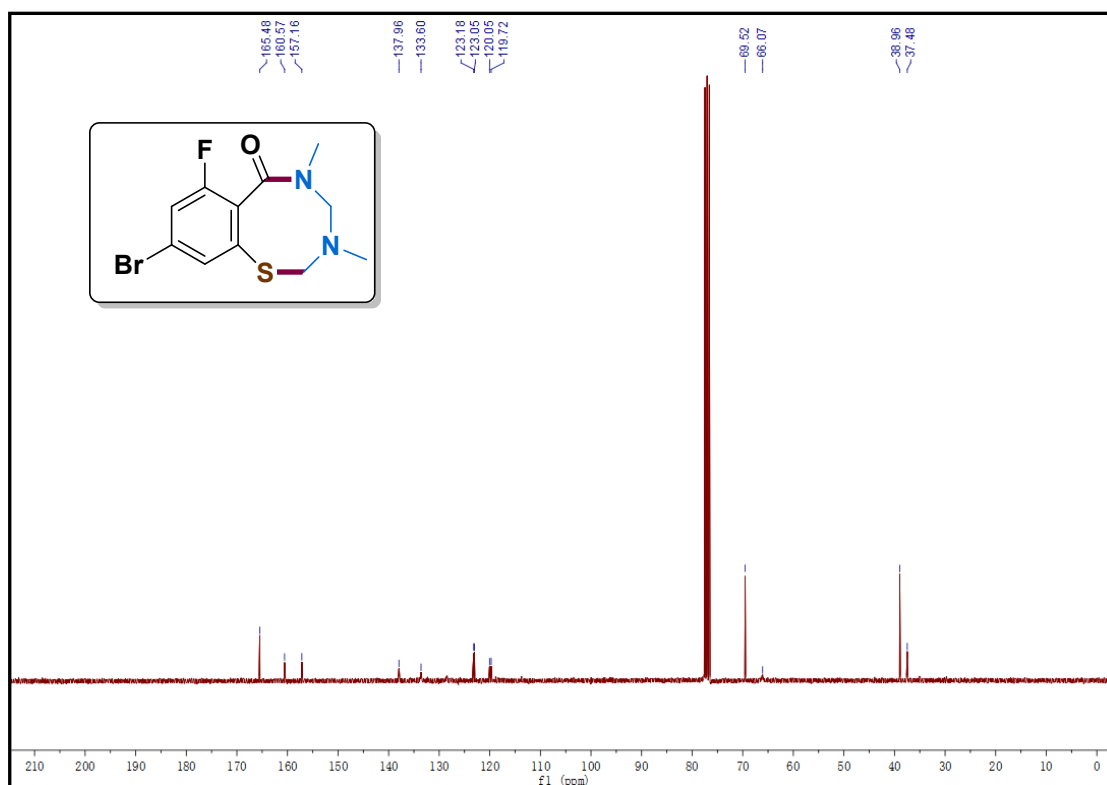



Chemical structure of compound 10 is shown in the inset. The  $^1\text{H}$  NMR spectrum (400 MHz,  $\text{CDCl}_3$ ) displays the following peaks (ppm) and integrations:

- 8.15 (s, 1H, integration 0.99)
- 7.97 (s, 1H, integration 1.00)
- 7.46 (s, 1H, integration 1.01)
- 7.43 (s, 1H, integration 1.01)
- 5.07 (s, 1H, integration 1.00)
- 5.04 (s, 1H, integration 1.00)
- 4.35 (s, 1H, integration 2.02)
- 4.30 (s, 1H, integration 1.06)
- 4.26 (s, 1H, integration 1.06)
- 4.16 (s, 1H, integration 1.06)
- 4.11 (s, 1H, integration 1.06)
- 3.89 (s, 1H, integration 1.06)
- 3.84 (s, 1H, integration 1.06)
- 3.83 (s, 1H, integration 1.06)
- 3.20 (s, 1H, integration 3.26)
- 2.55 (s, 1H, integration 3.50)
- 2.43 (s, 1H, integration 1.19)
- 2.42 (s, 1H, integration 1.19)
- 2.39 (s, 1H, integration 1.25)
- 2.37 (s, 1H, integration 1.25)
- 2.03 (s, 1H, integration 1.25)
- 1.74 (s, 1H, integration 2.23)
- 1.69 (s, 1H, integration 2.23)
- 1.67 (s, 1H, integration 2.23)
- 1.35 (s, 1H, integration 2.03)
- 1.30 (s, 1H, integration 1.17)
- 1.29 (s, 1H, integration 1.17)
- 1.26 (s, 1H, integration 1.17)
- 1.23 (s, 1H, integration 1.17)
- 1.21 (s, 1H, integration 1.17)
- 1.18 (s, 1H, integration 1.17)
- 1.09 (s, 1H, integration 1.17)
- 1.07 (s, 1H, integration 1.17)
- 1.06 (s, 1H, integration 1.17)
- 1.04 (s, 1H, integration 1.17)
- 1.03 (s, 1H, integration 1.17)
- 1.01 (s, 1H, integration 1.17)
- 1.00 (s, 1H, integration 1.17)
- 0.90 (s, 1H, integration 1.17)

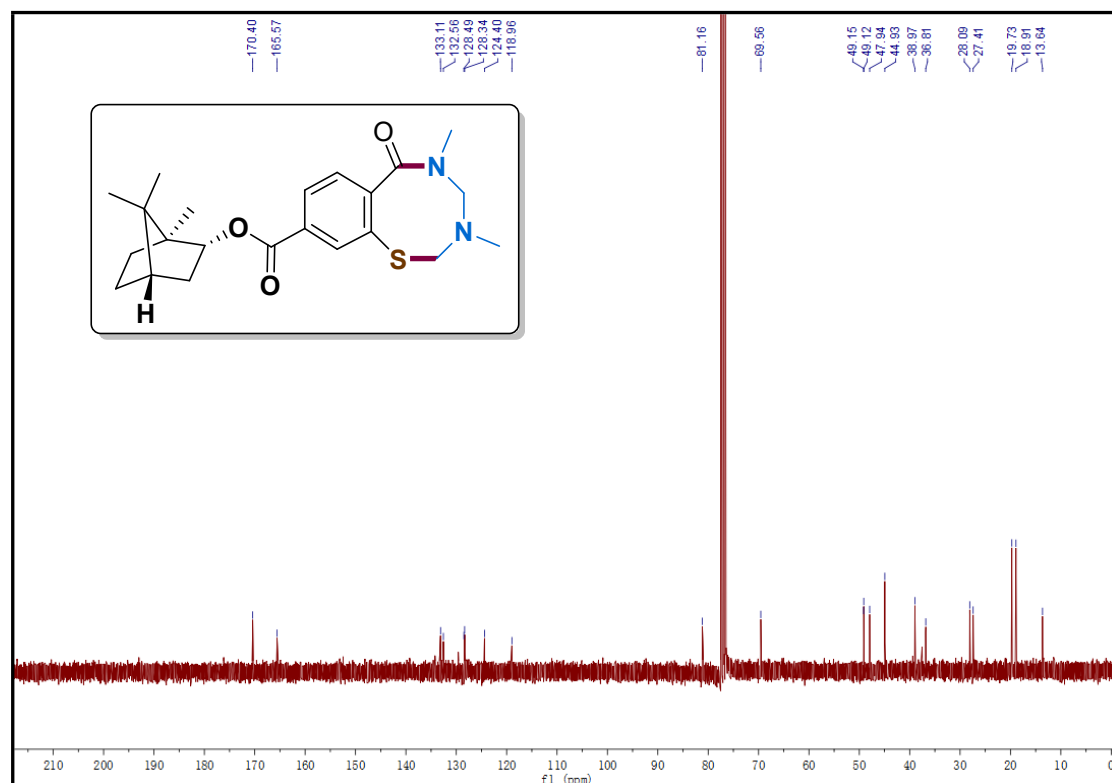

### 3-phenyl-2,3-dihydro-4H-benzo[e][1,3]thiazin-4-one (4a)

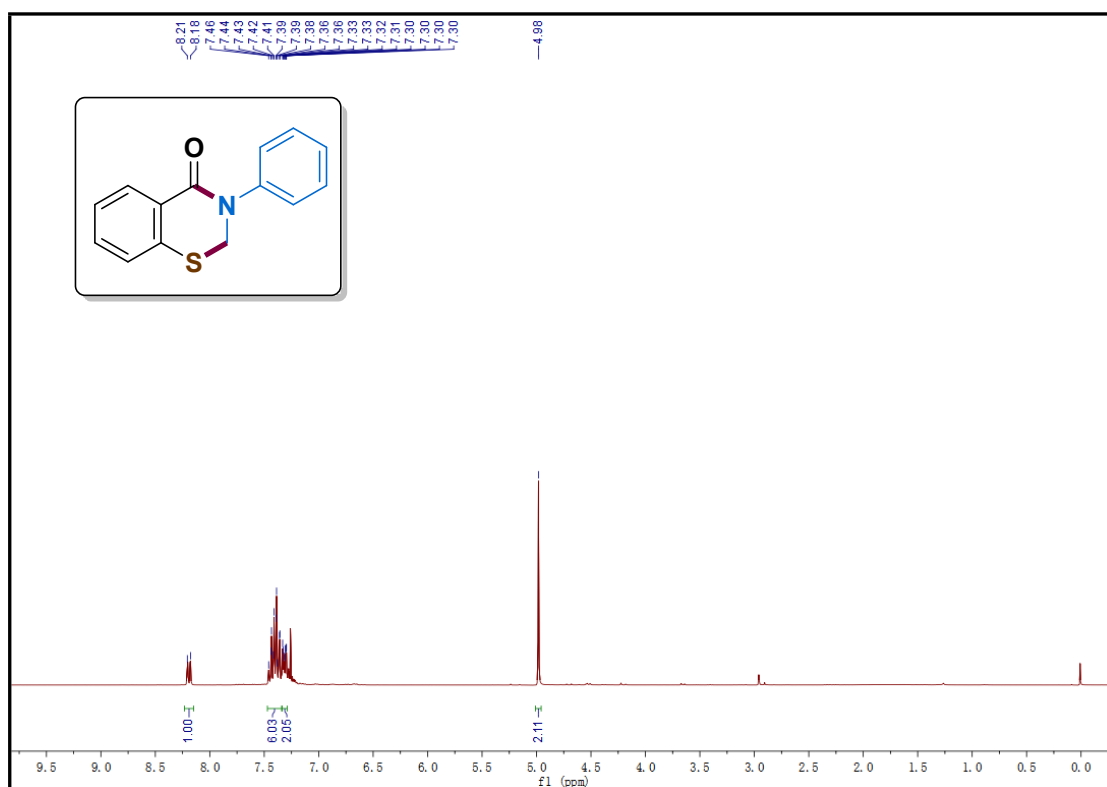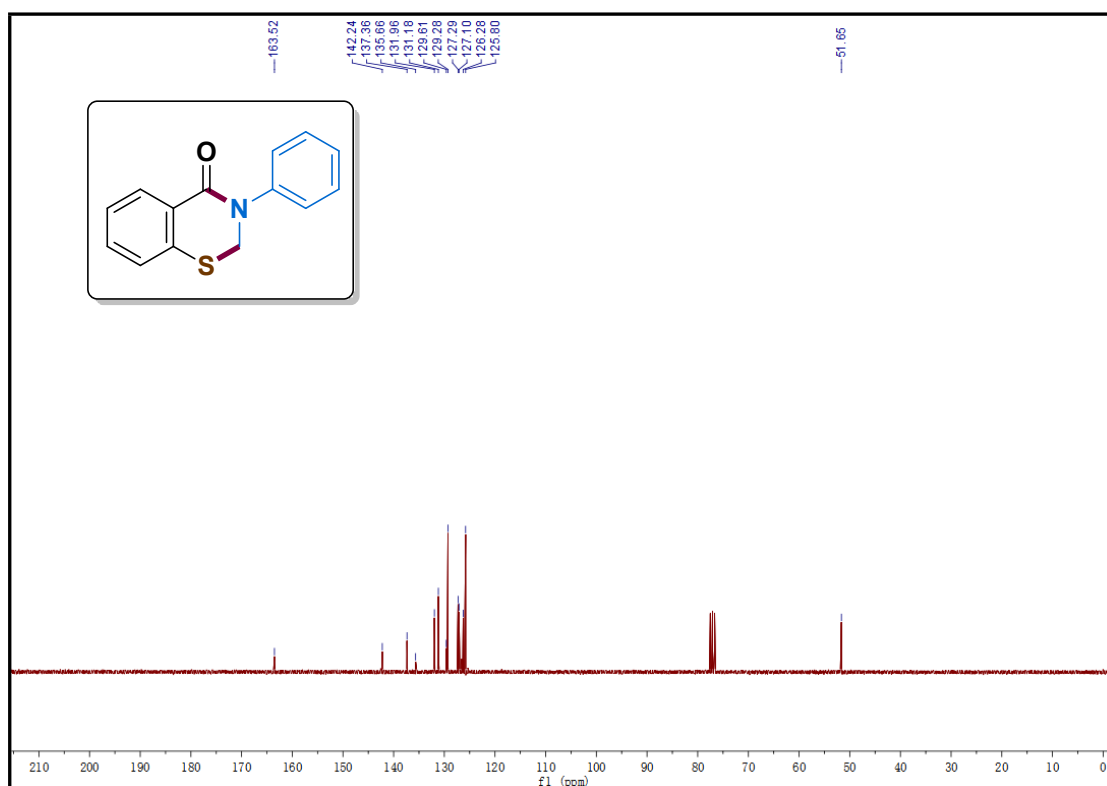

### 3-(p-tolyl)-2,3-dihydro-4H-benzo[e][1,3]thiazin-4-one (4b)

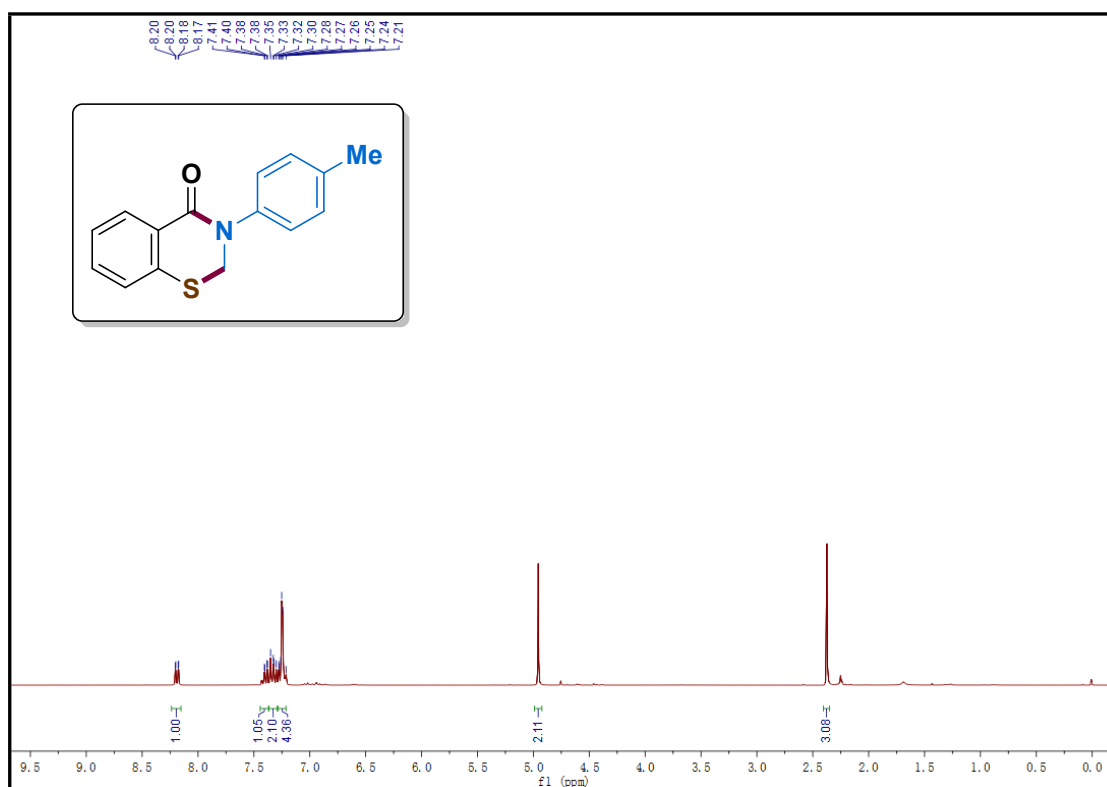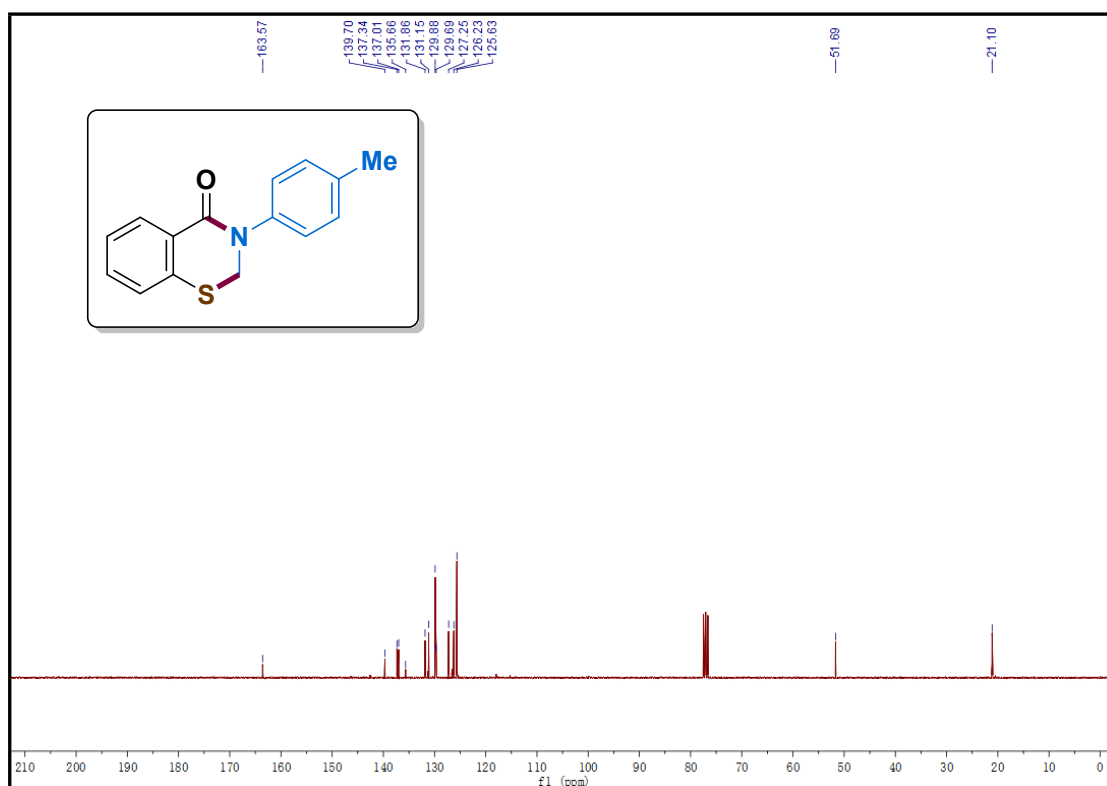

**3-(4-methoxyphenyl)-2,3-dihydro-4H-benzo[e][1,3]thiazin-4-one (4c)**

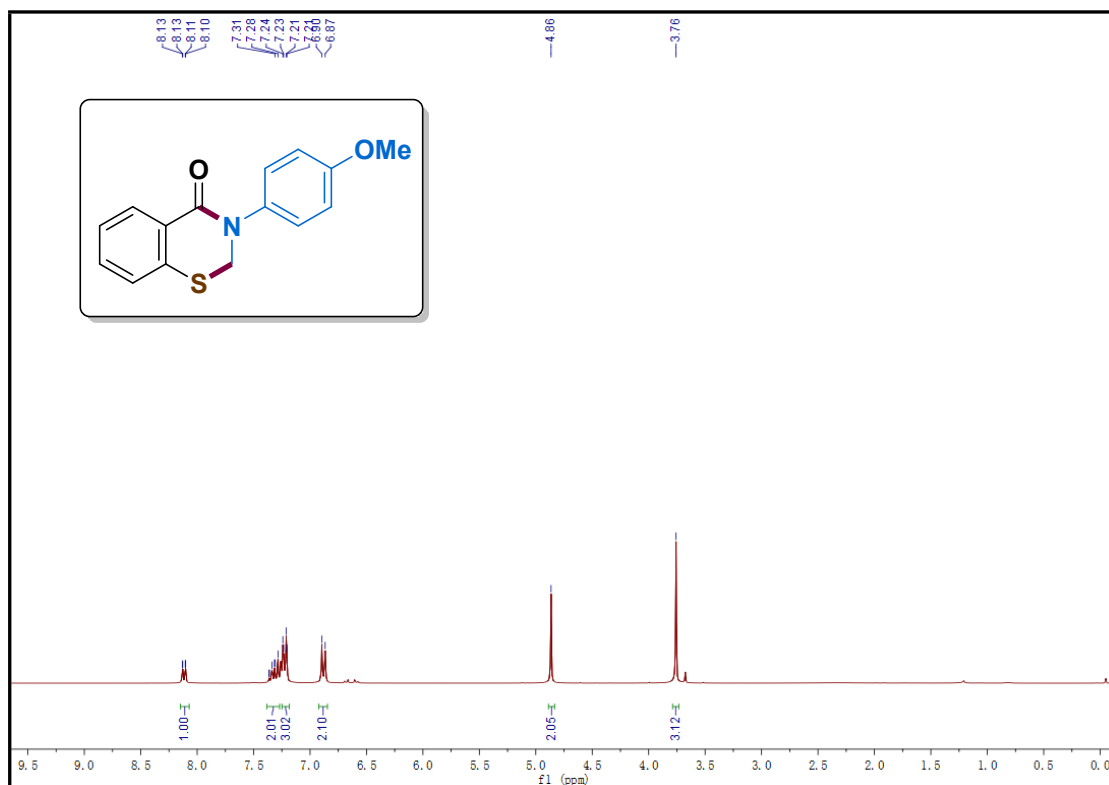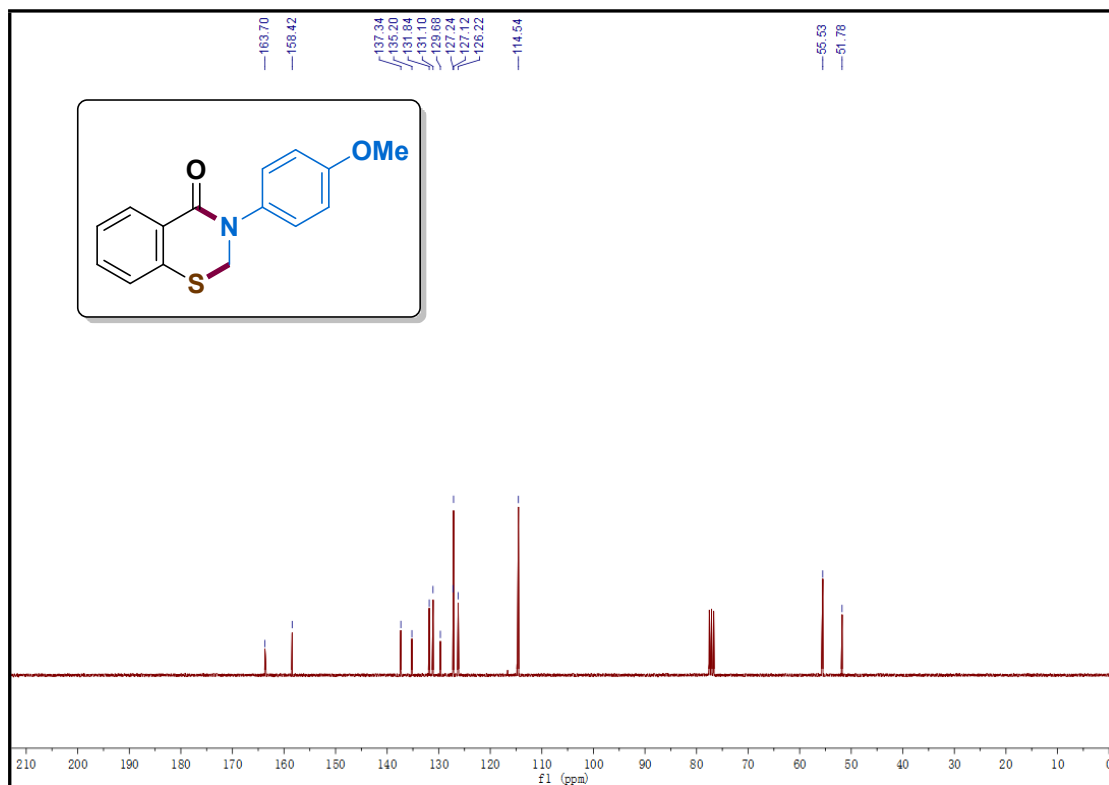

**3-(4-(methylthio)phenyl)-2,3-dihydro-4H-benzo[e][1,3]thiazin-4-one (4d)**

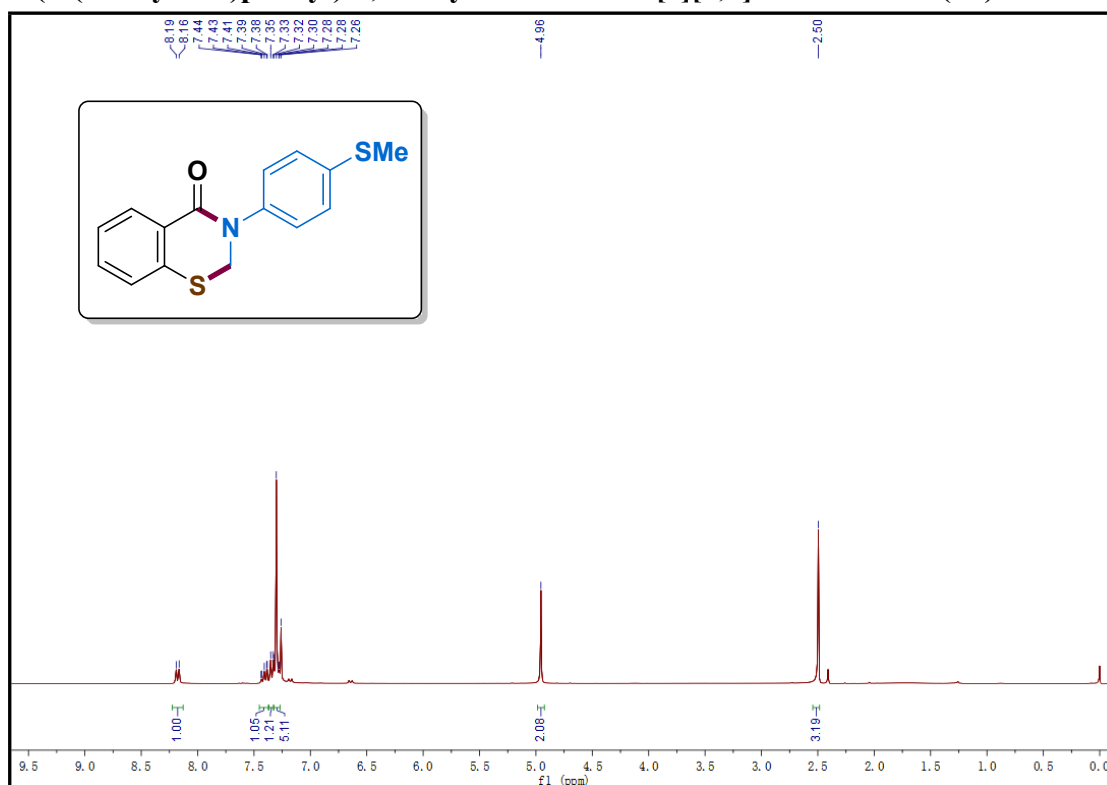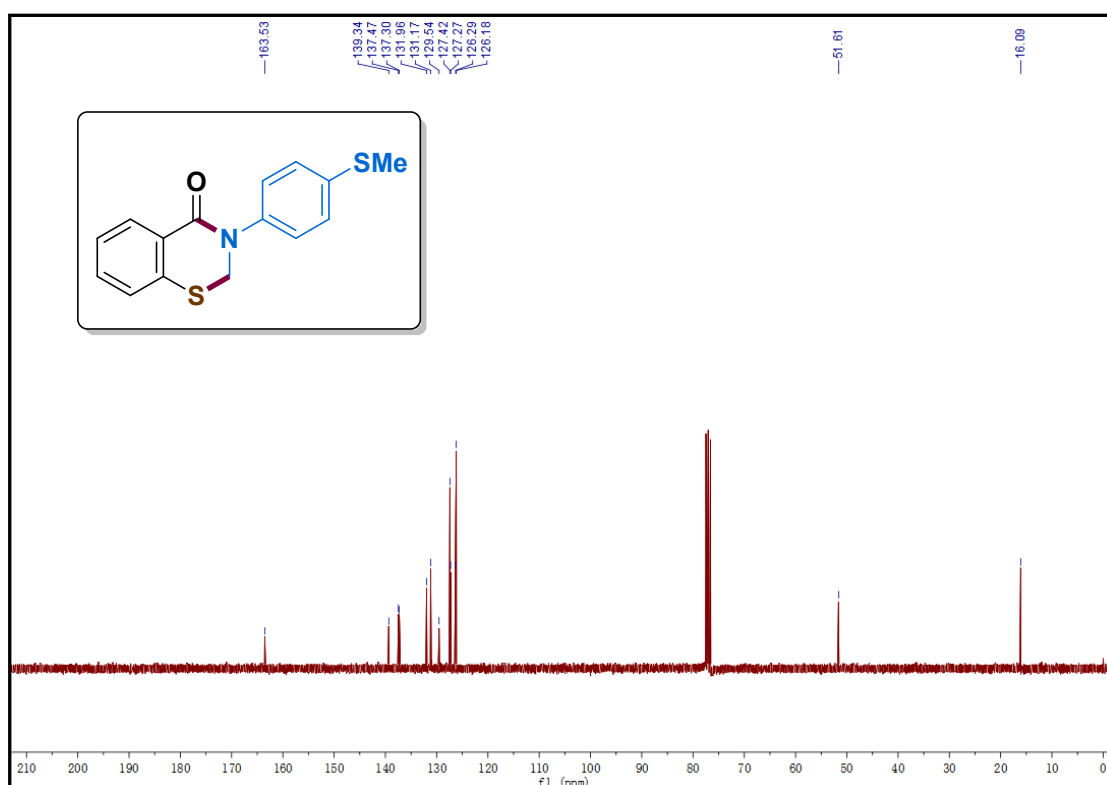

### 3-(4-(tert-butyl)phenyl)-2,3-dihydro-4H-benzo[e][1,3]thiazin-4-one (4e)

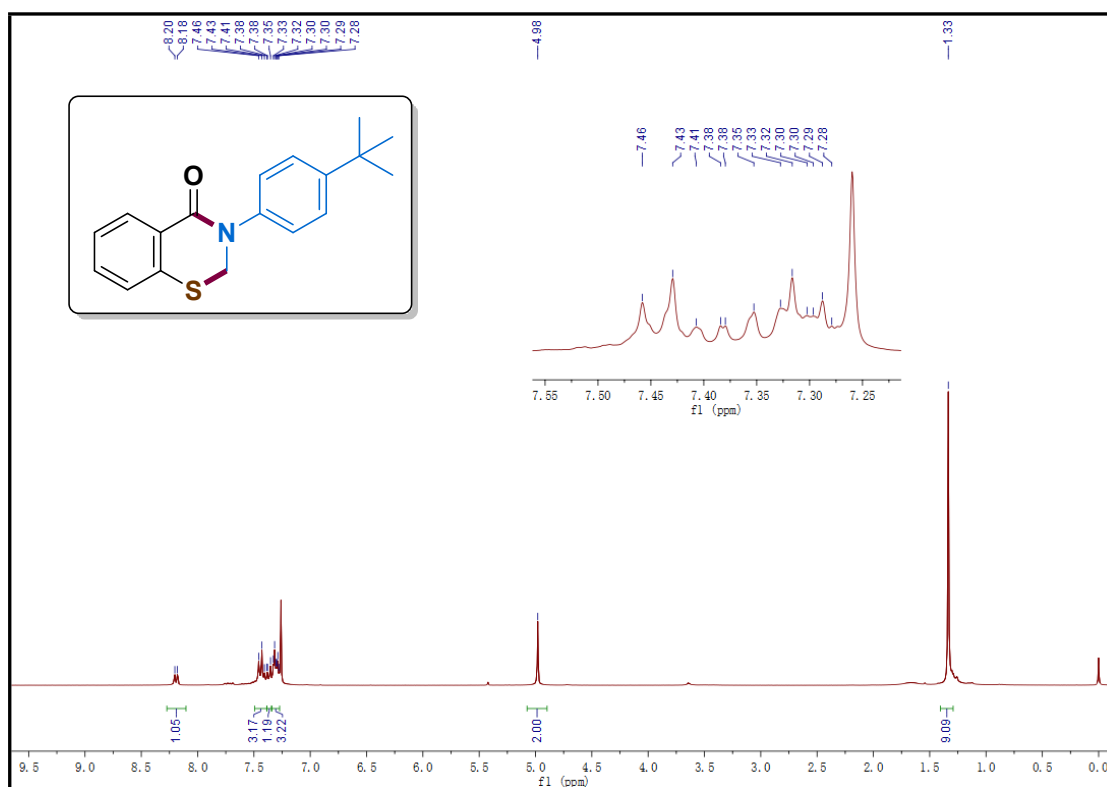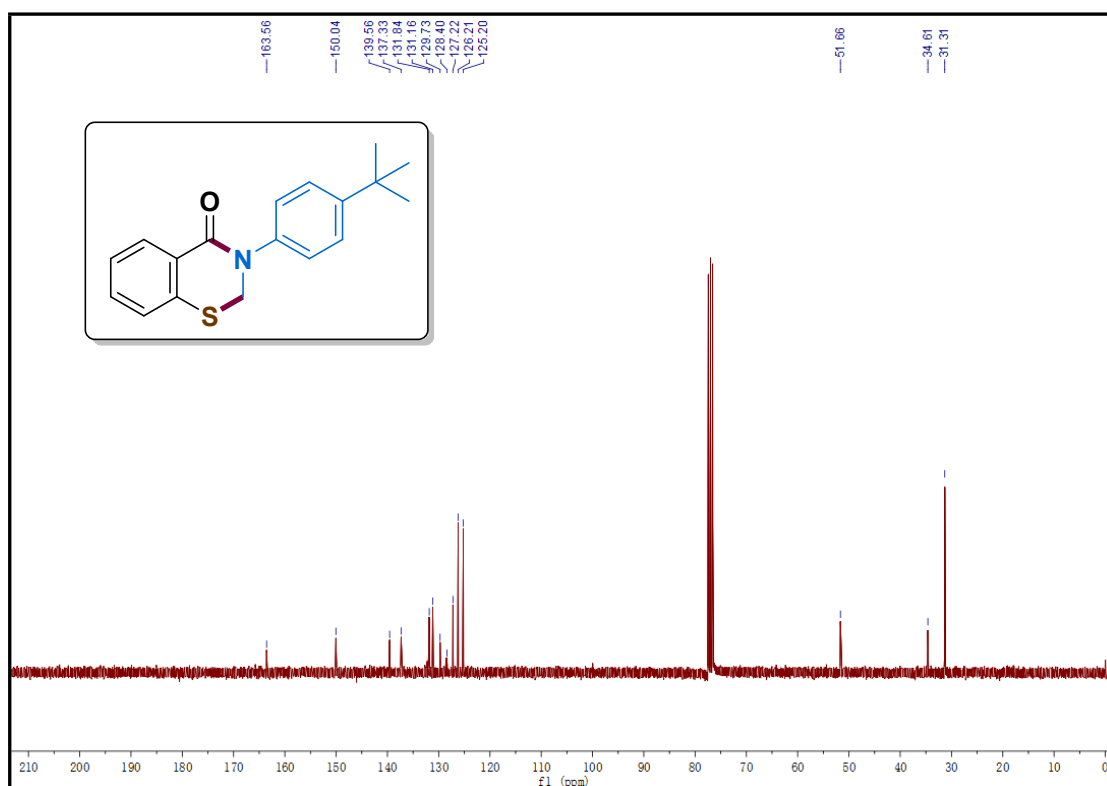

**3-(benzo[d][1,3]dioxol-5-yl)-2,3-dihydro-4H-benzo[e][1,3]thiazin-4-one (4f)**

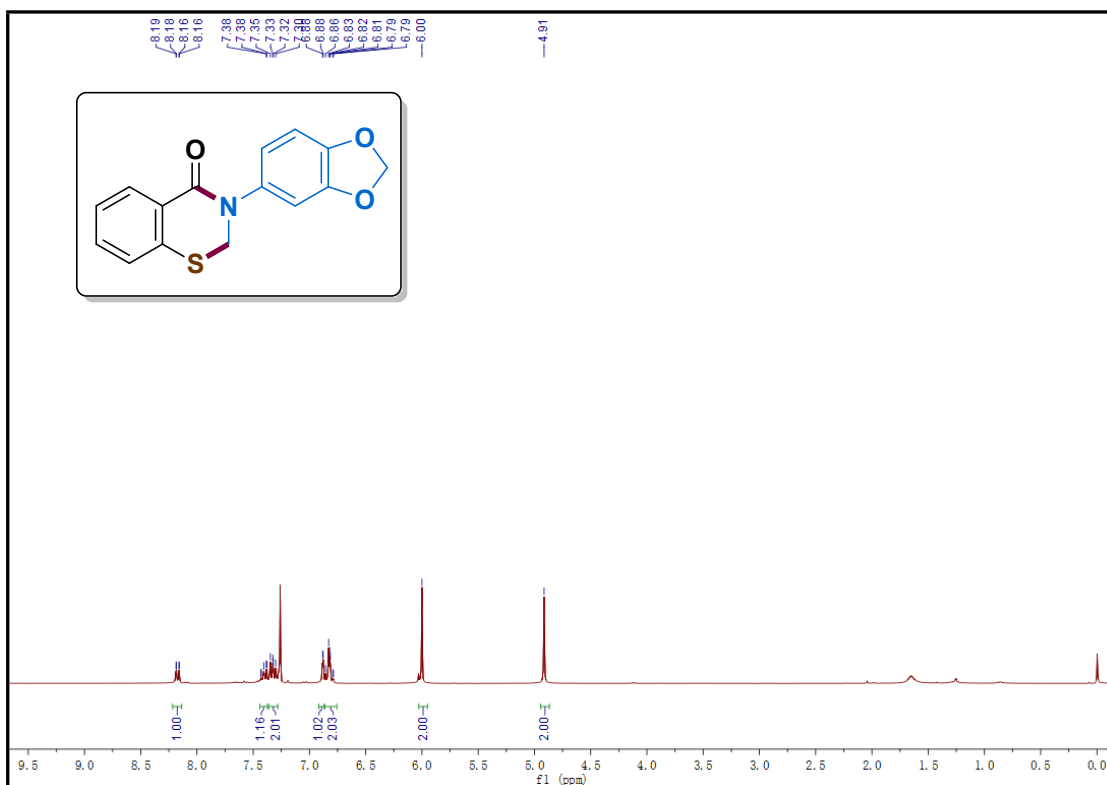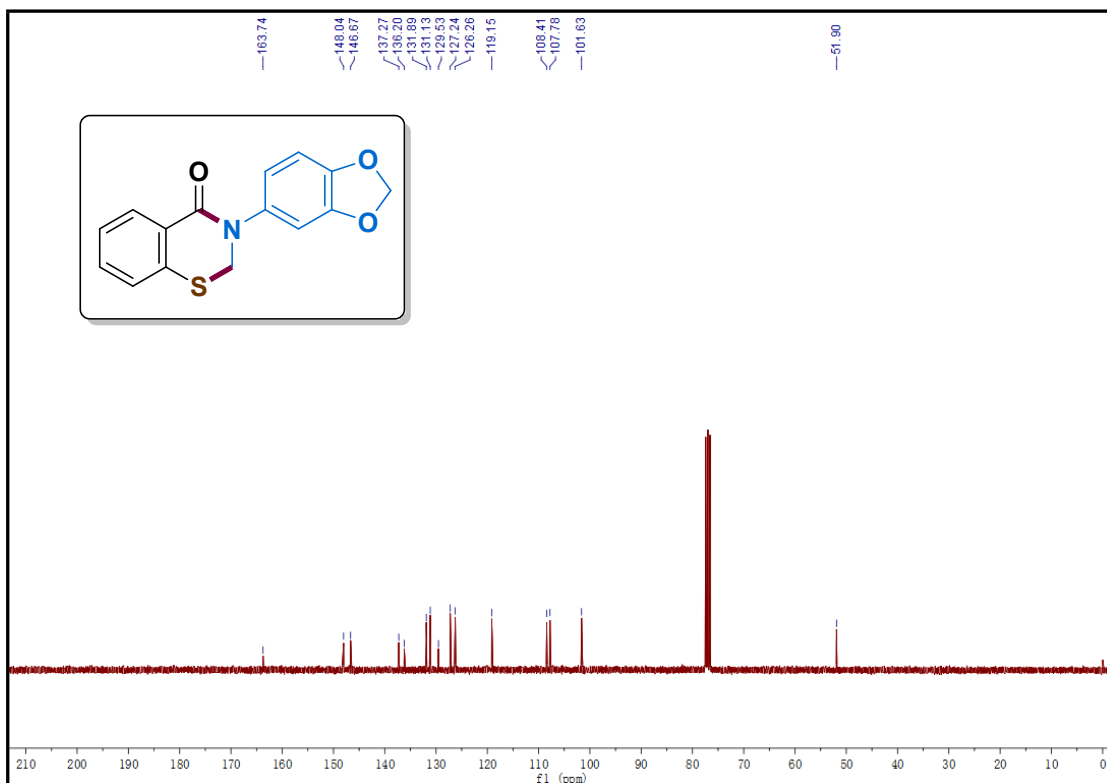

**3-(4-(dimethylamino)phenyl)-2,3-dihydro-4H-benzo[e][1,3]thiazin-4-one (4g)**

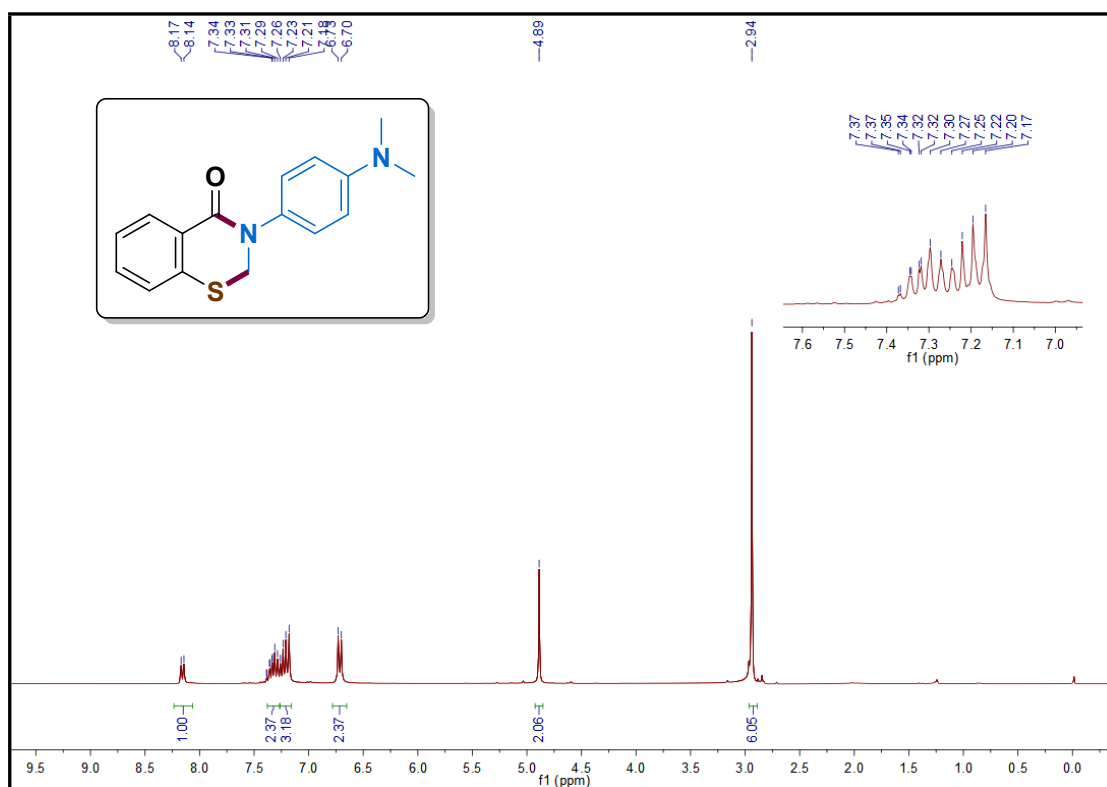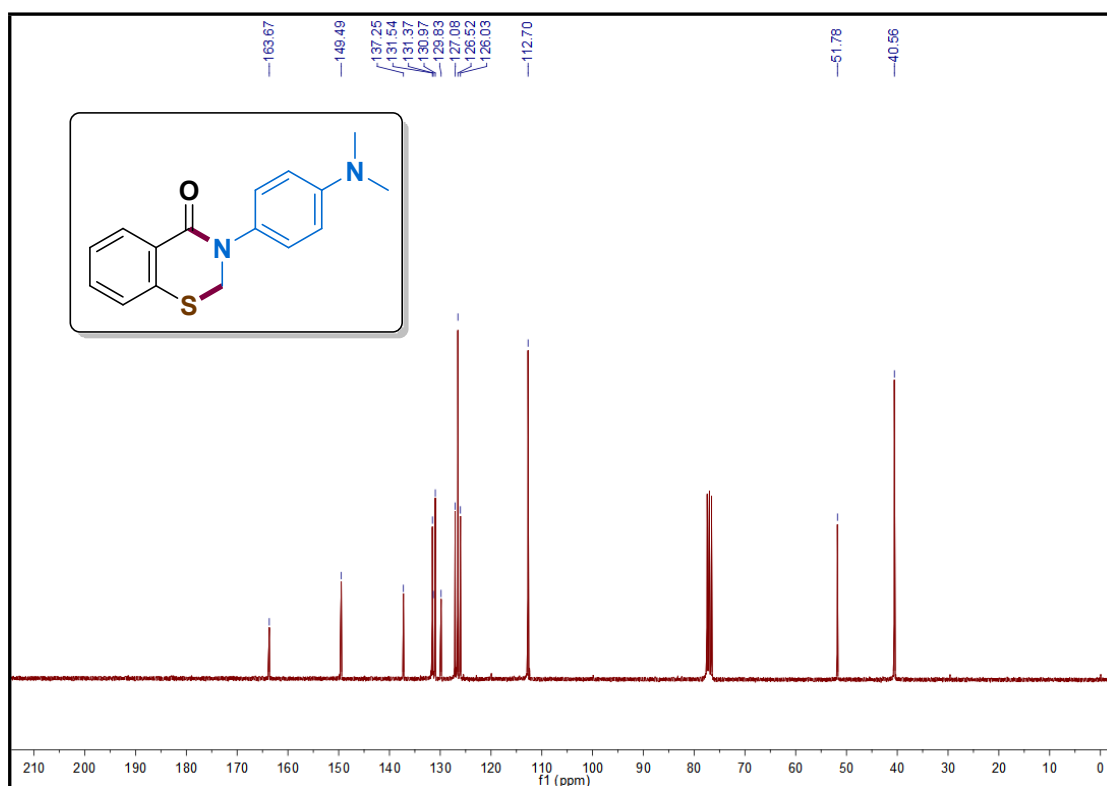



### 3-(4-(morpholinomethyl)phenyl)-2,3-dihydro-4H-benzo[e][1,3]thiazin-4-one (4h)

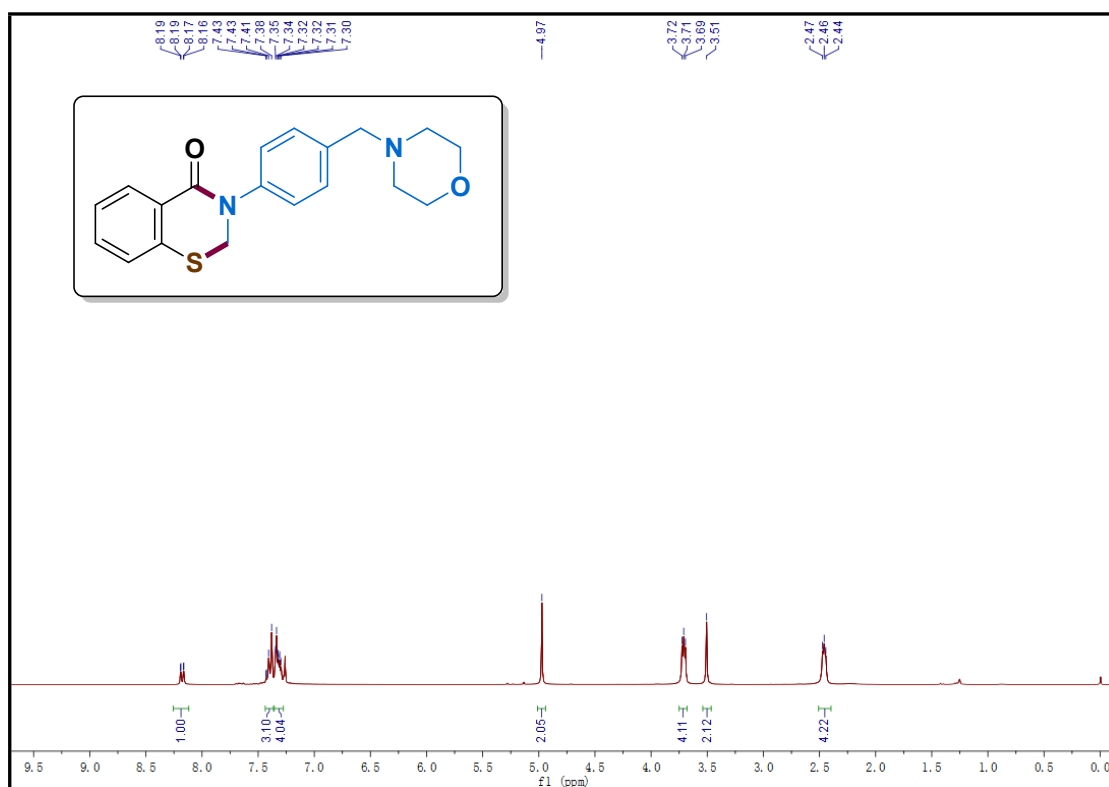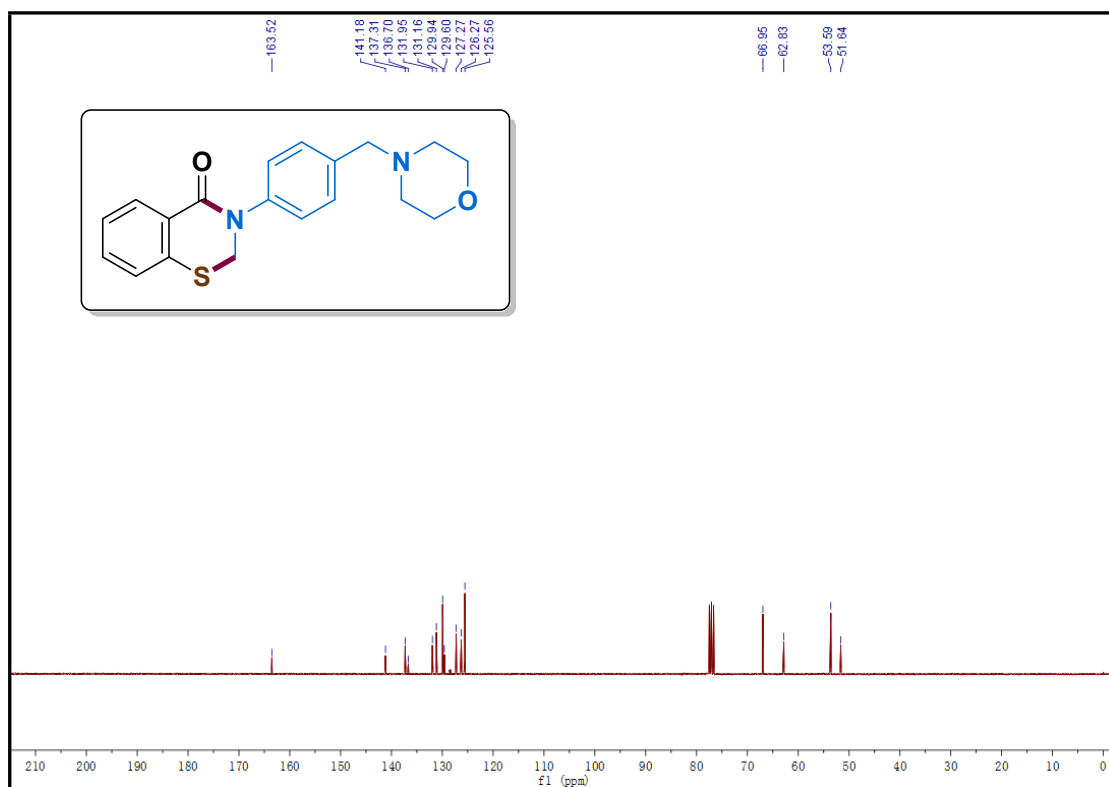

**methyl 4-(4-oxo-2H-benzo[e][1,3]thiazin-3(4H)-yl)benzoate (4i)**

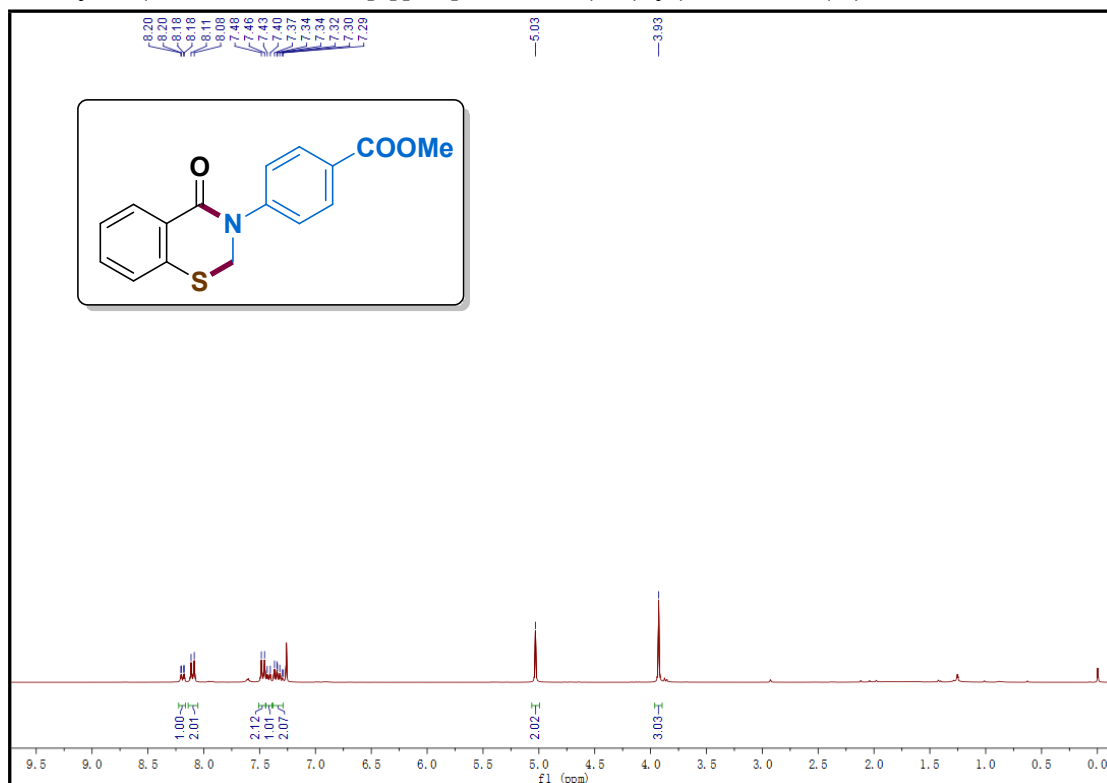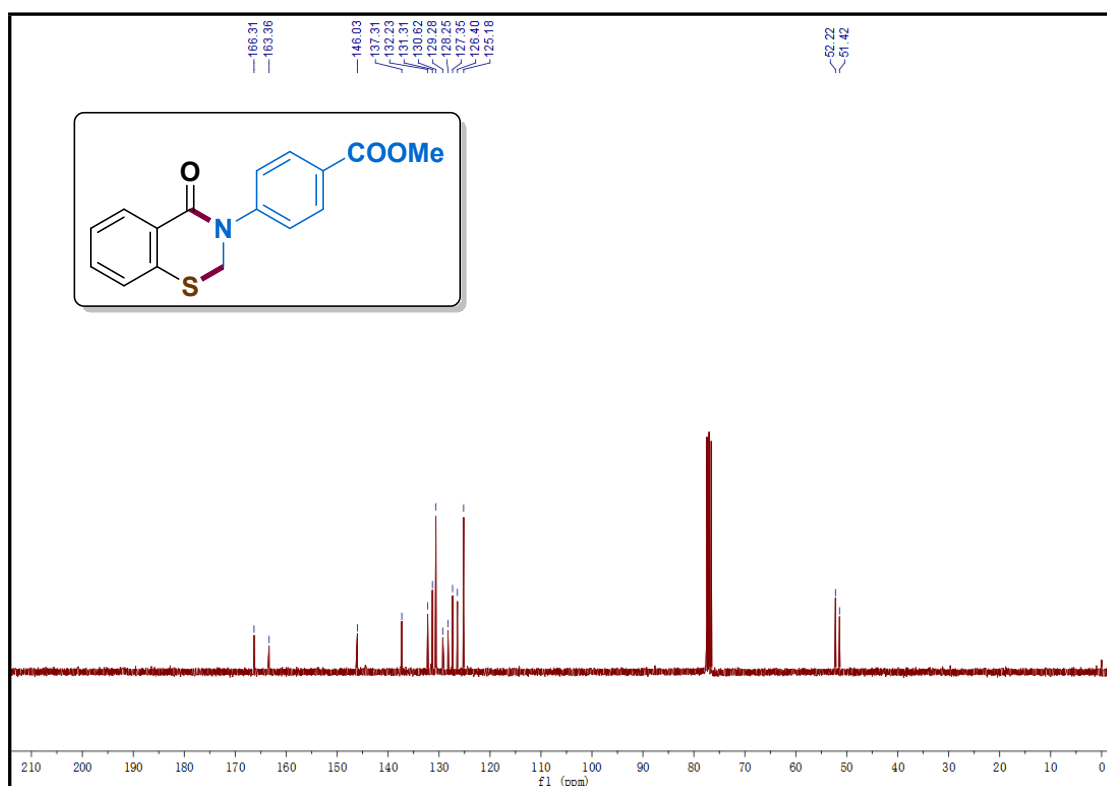

**3-(benzo[d]thiazol-5-yl)-2,3-dihydro-4H-benzo[e][1,3]thiazin-4-one (4j)**

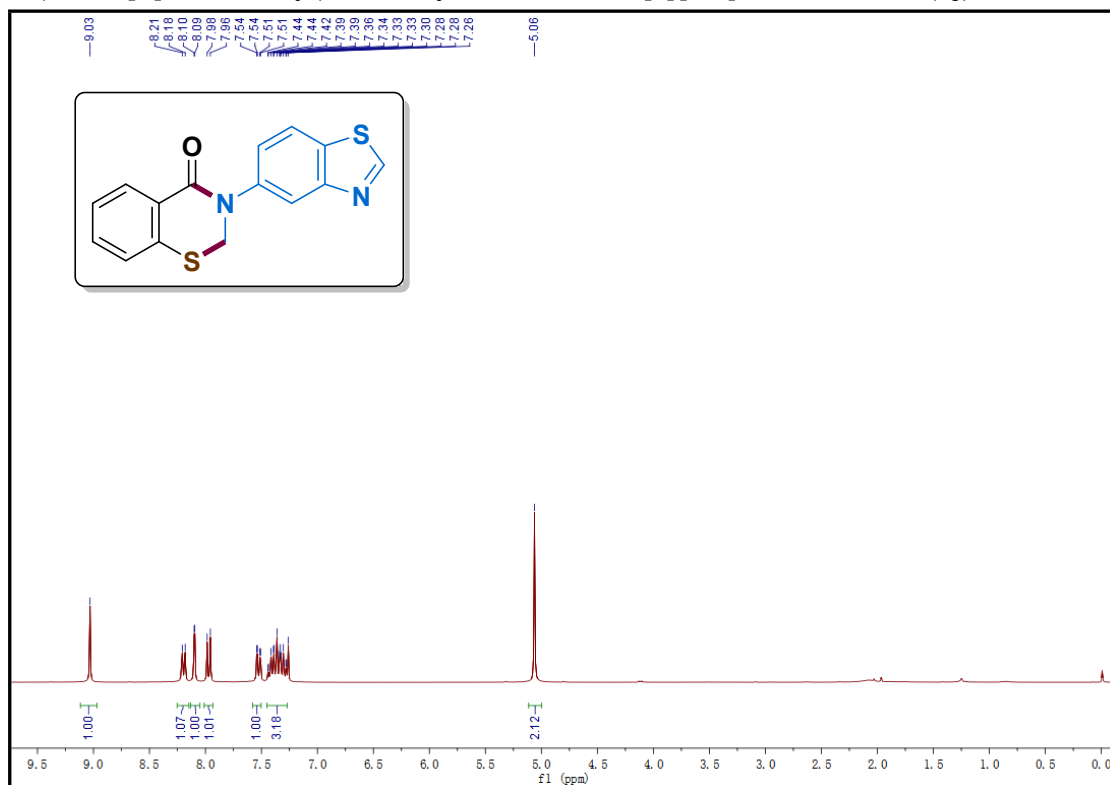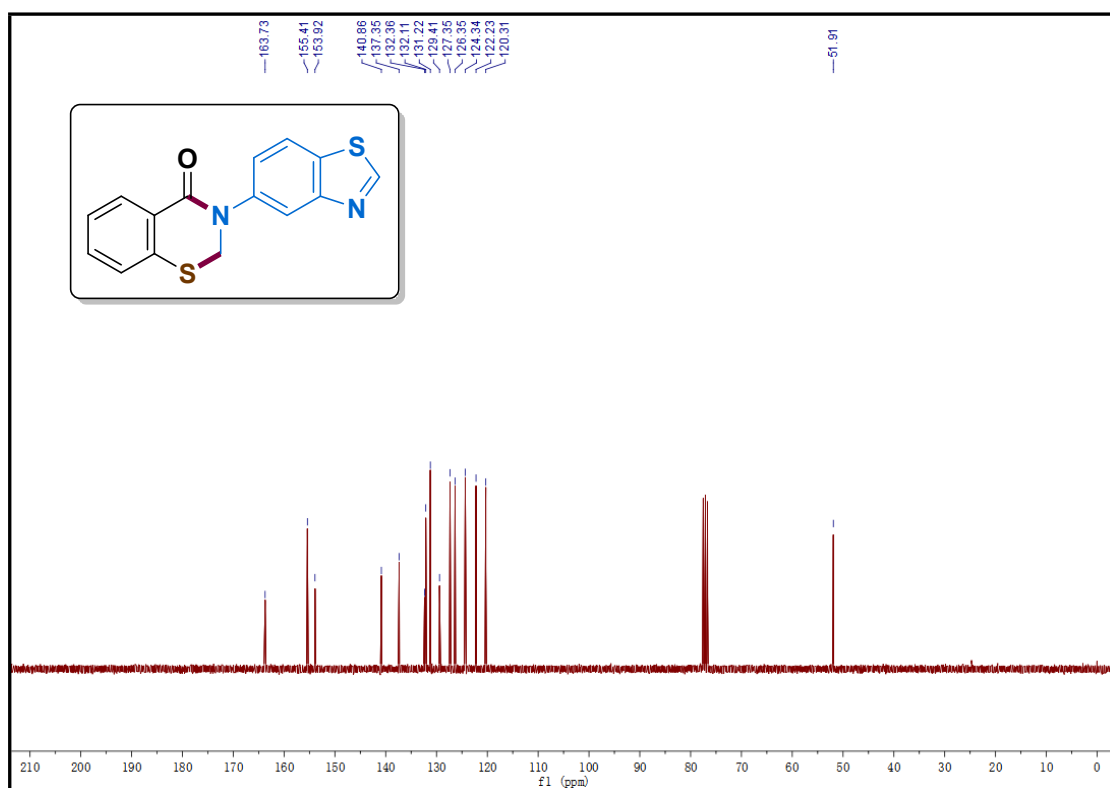

**3-(2-ethyl-2H-indazol-5-yl)-2,3-dihydro-4H-benzo[e][1,3]thiazin-4-one (4k)**

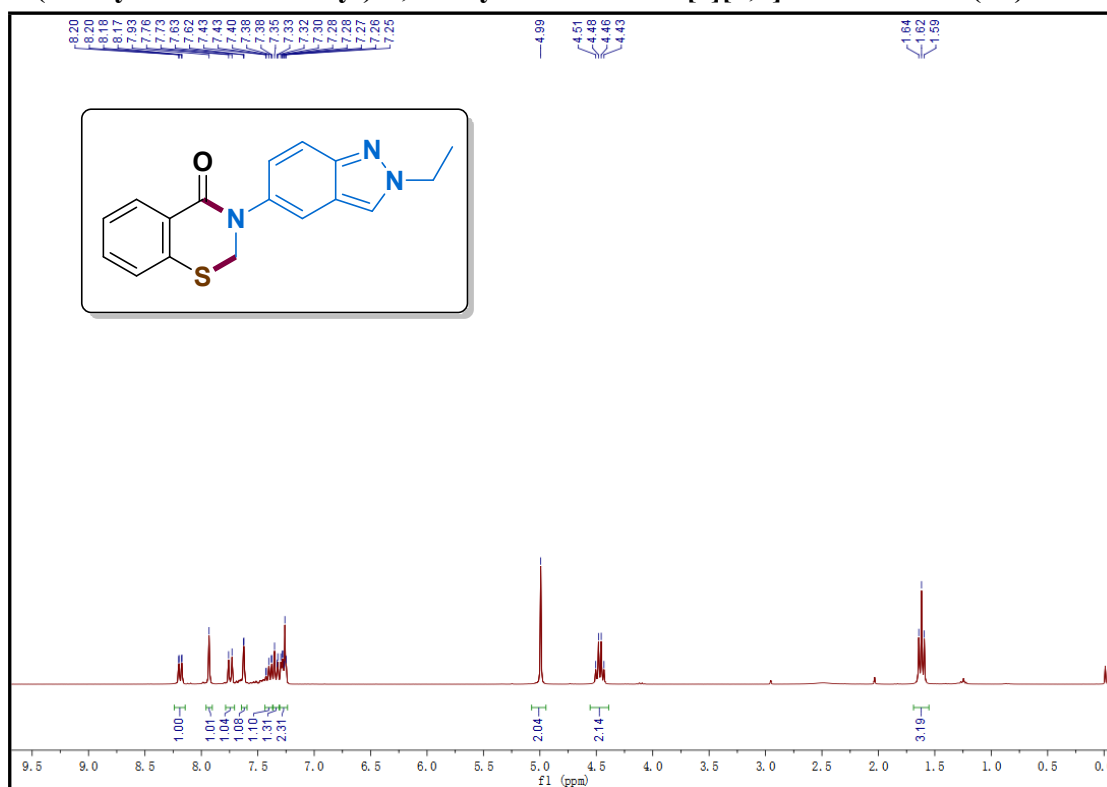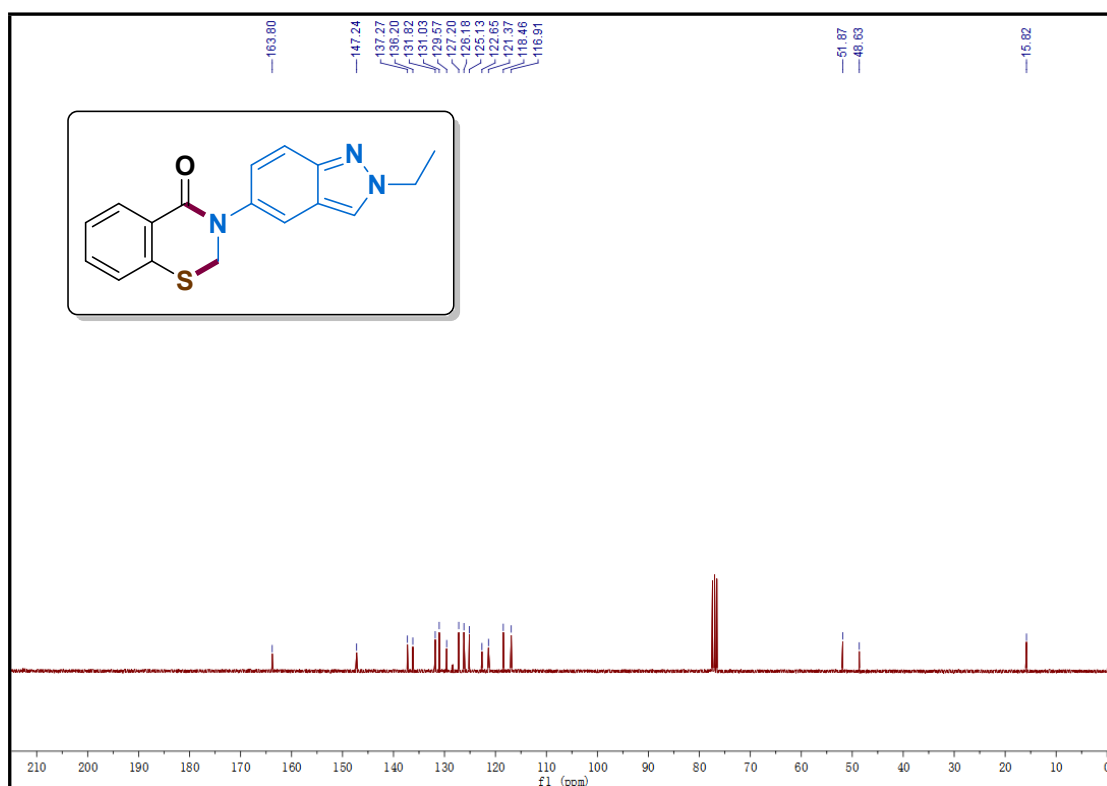

**3-(pyridin-2-ylmethyl)-2,3-dihydro-4H-benzo[e][1,3]thiazin-4-one (4l)**

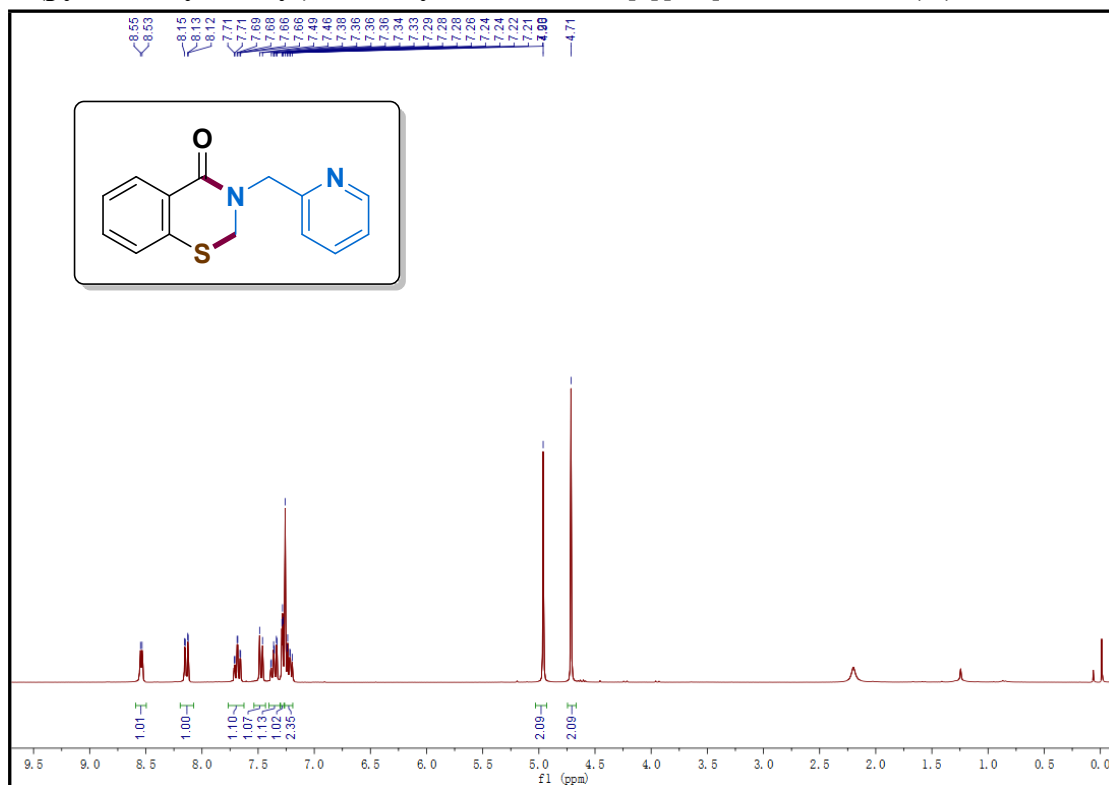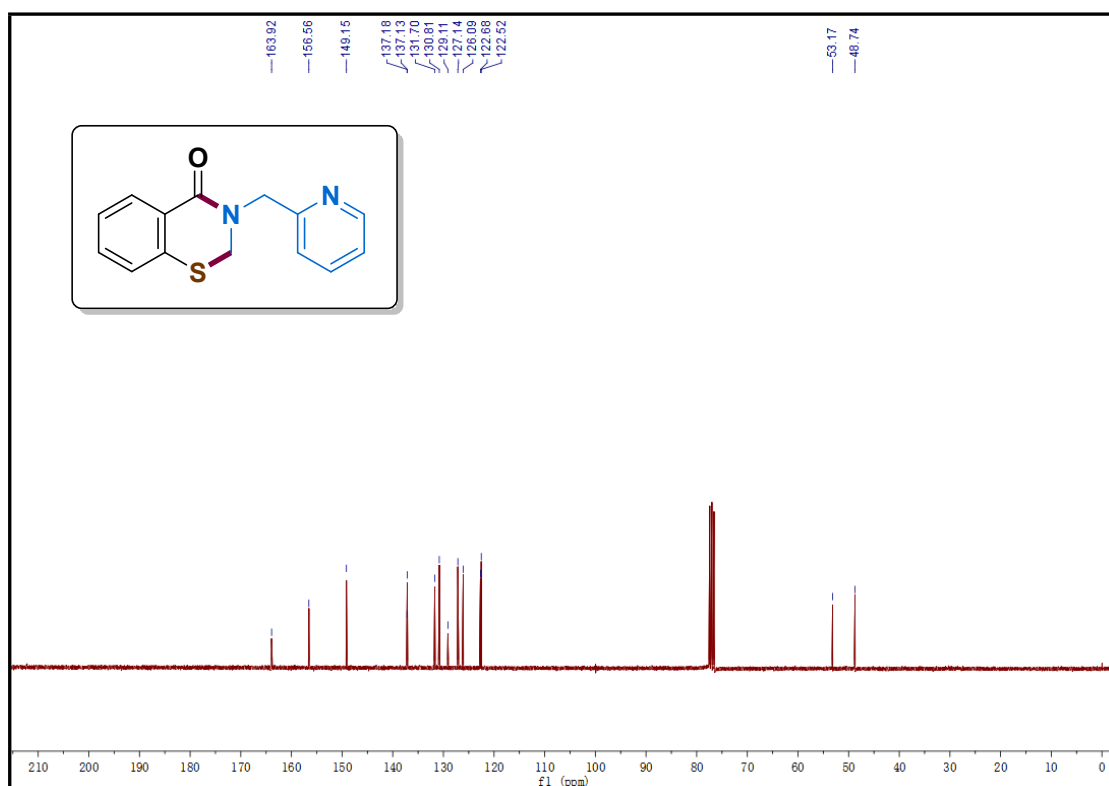

### 3-(thiophen-2-ylmethyl)-2,3-dihydro-4H-benzo[e][1,3]thiazin-4-one (4m)

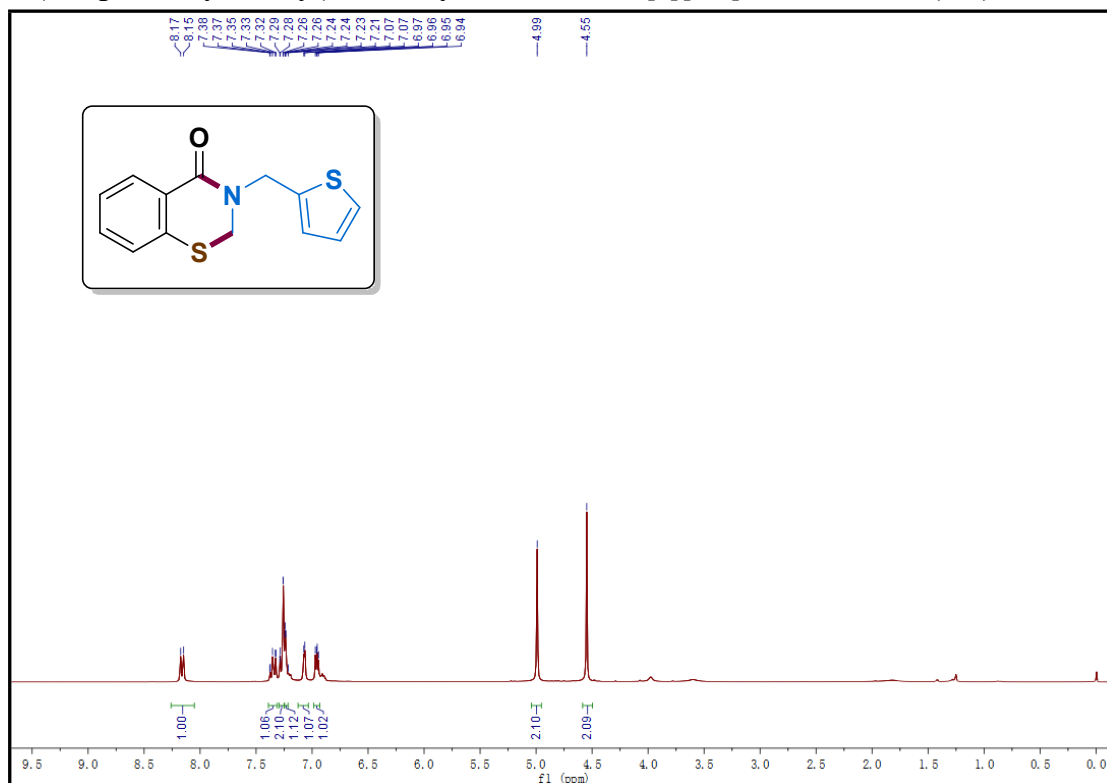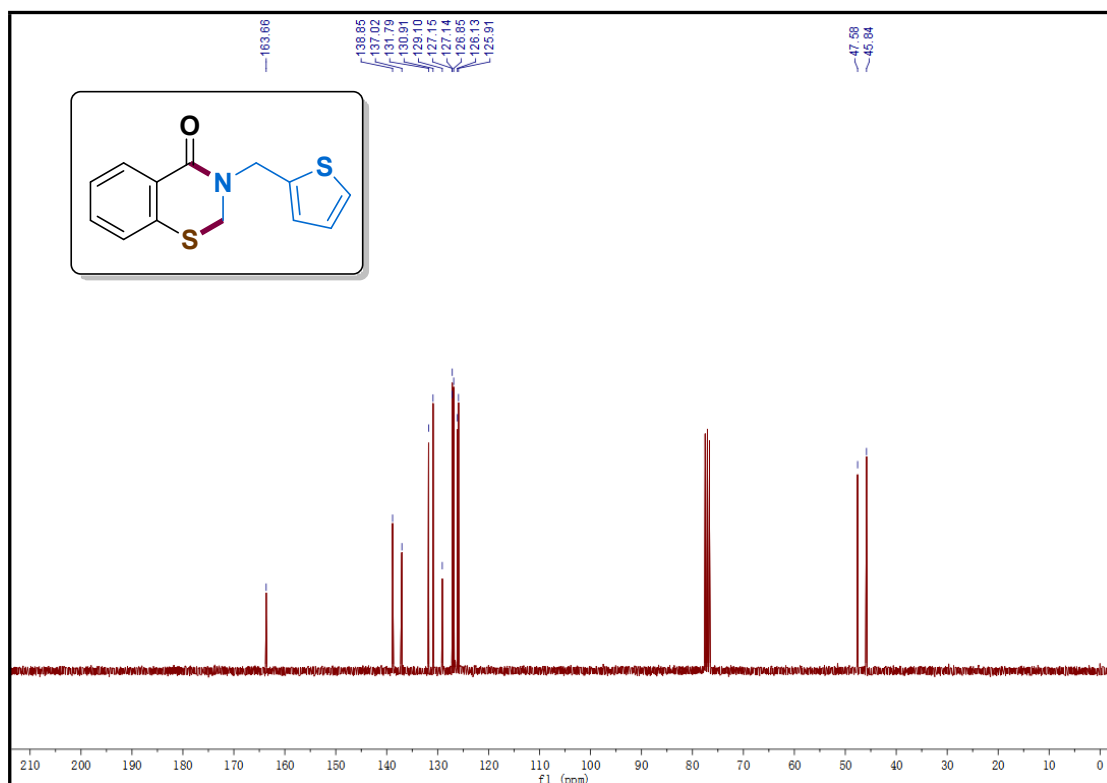

### 3-(furan-2-ylmethyl)-2,3-dihydro-4H-benzo[e][1,3]thiazin-4-one (4n)

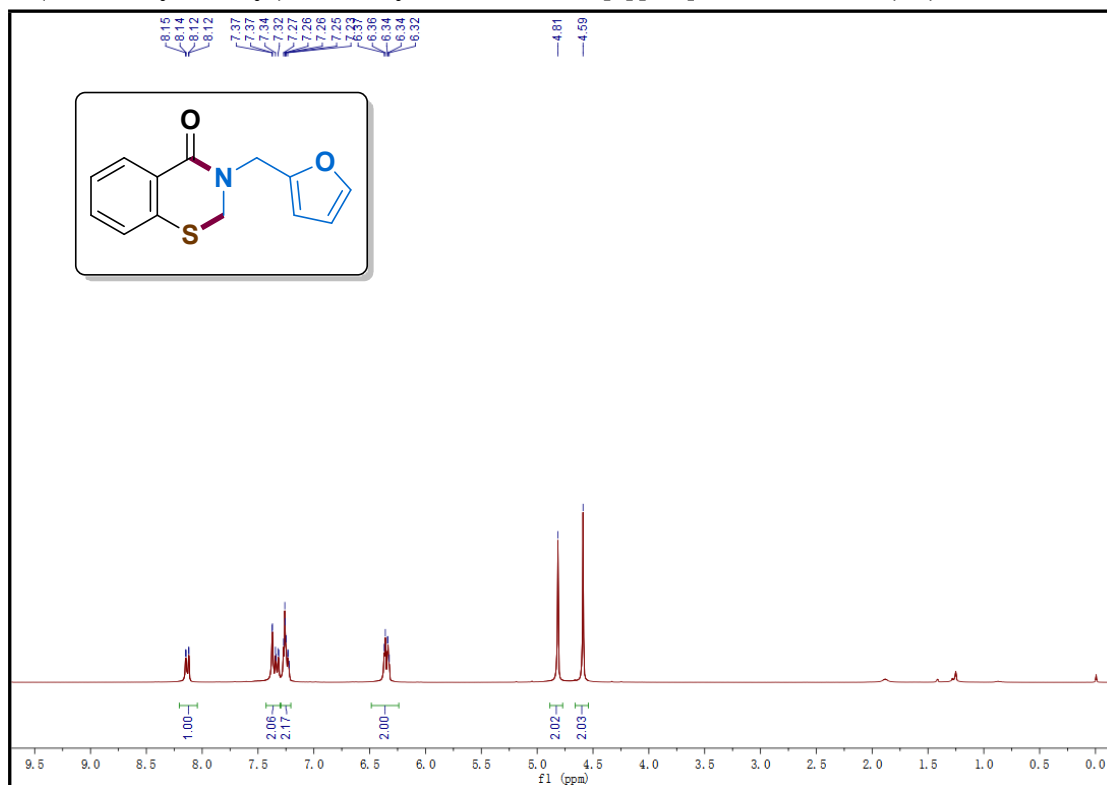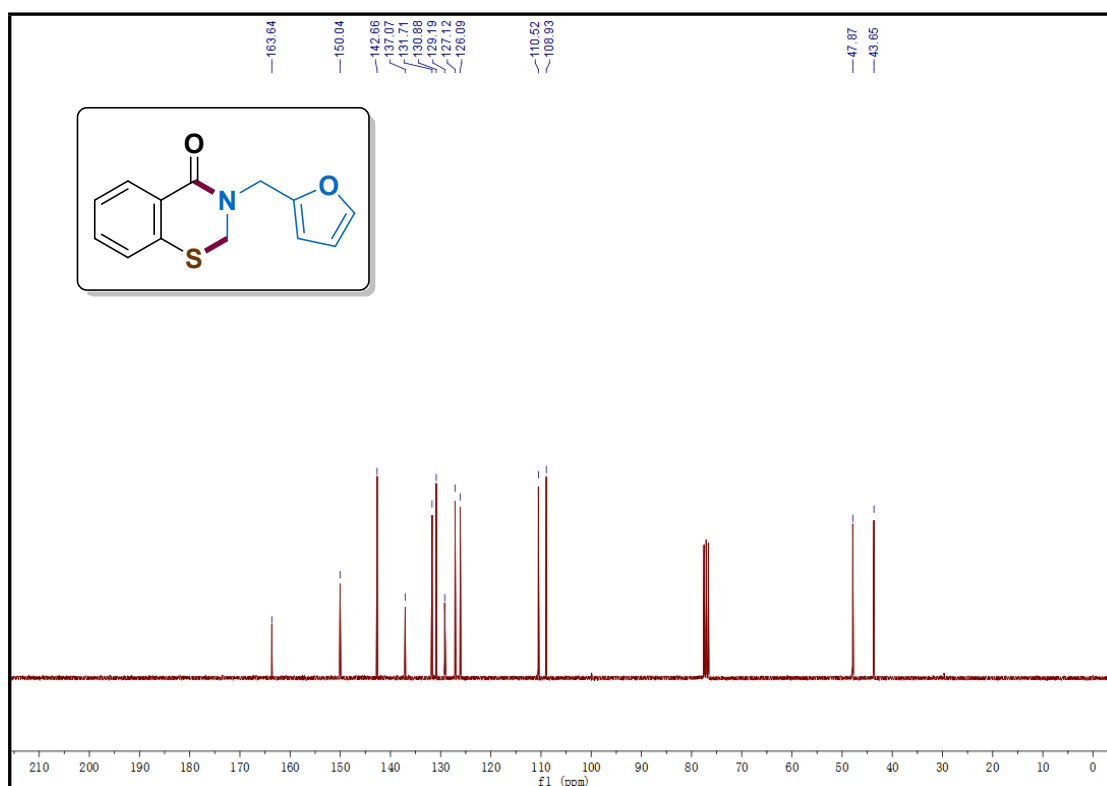

### 3-(2,3-dihydro-1H-inden-1-yl)-2,3-dihydro-4H-benzo[e][1,3]thiazin-4-one (4o)

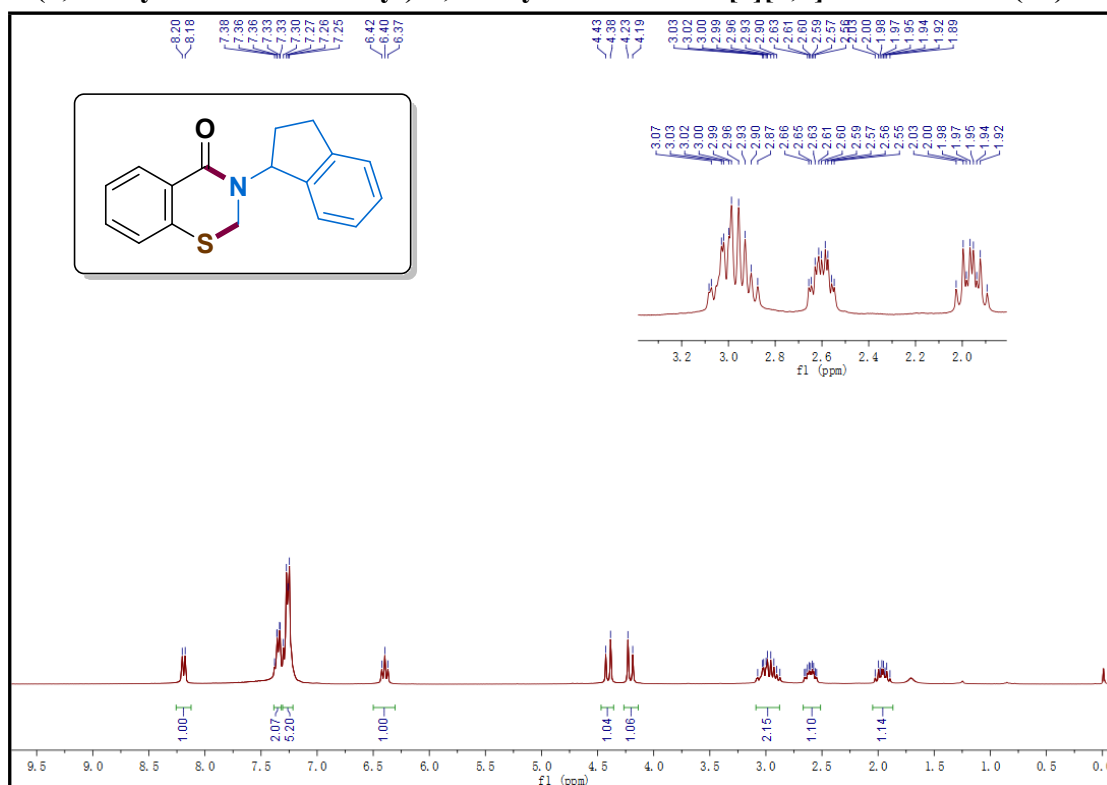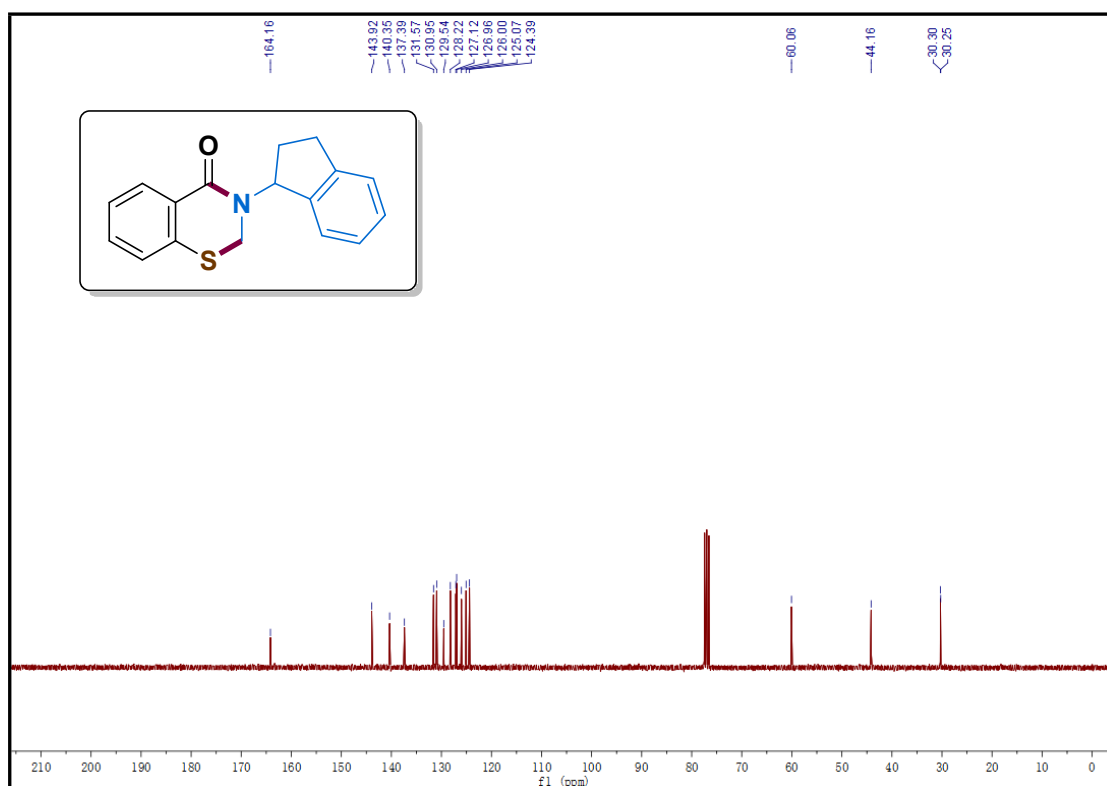



**3-benzyl-2,3-dihydro-4H-benzo[e][1,3]thiazin-4-one (4p)**

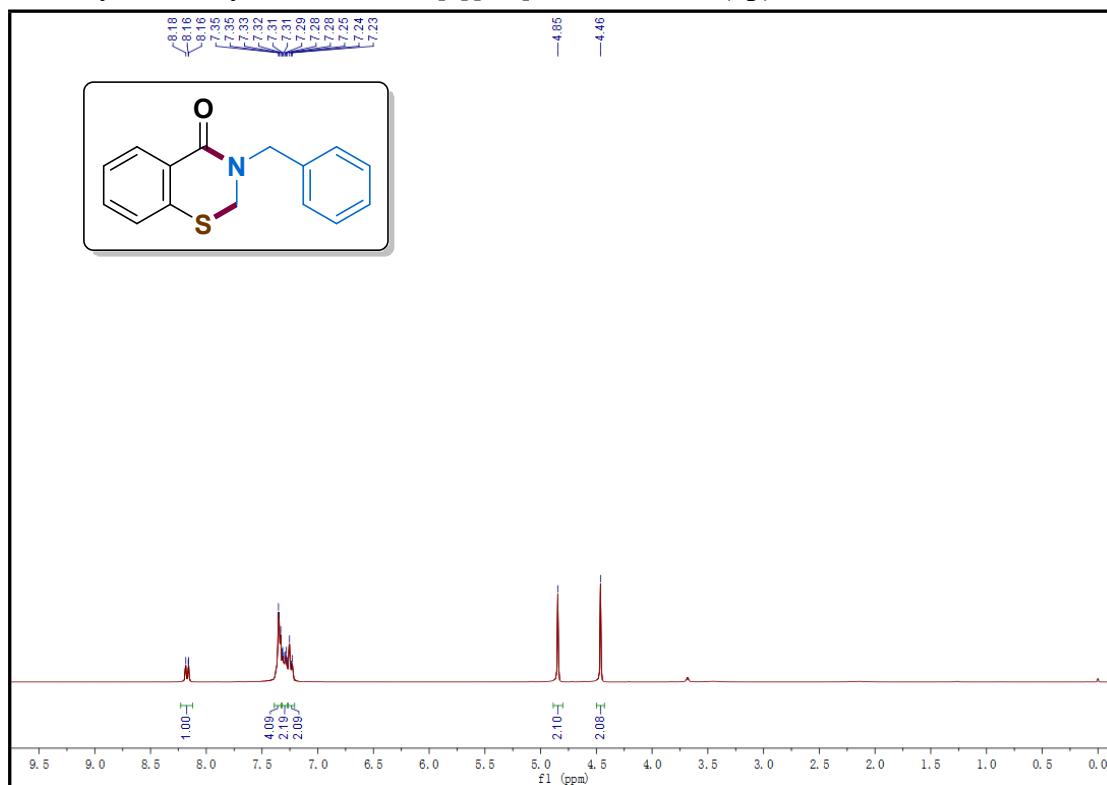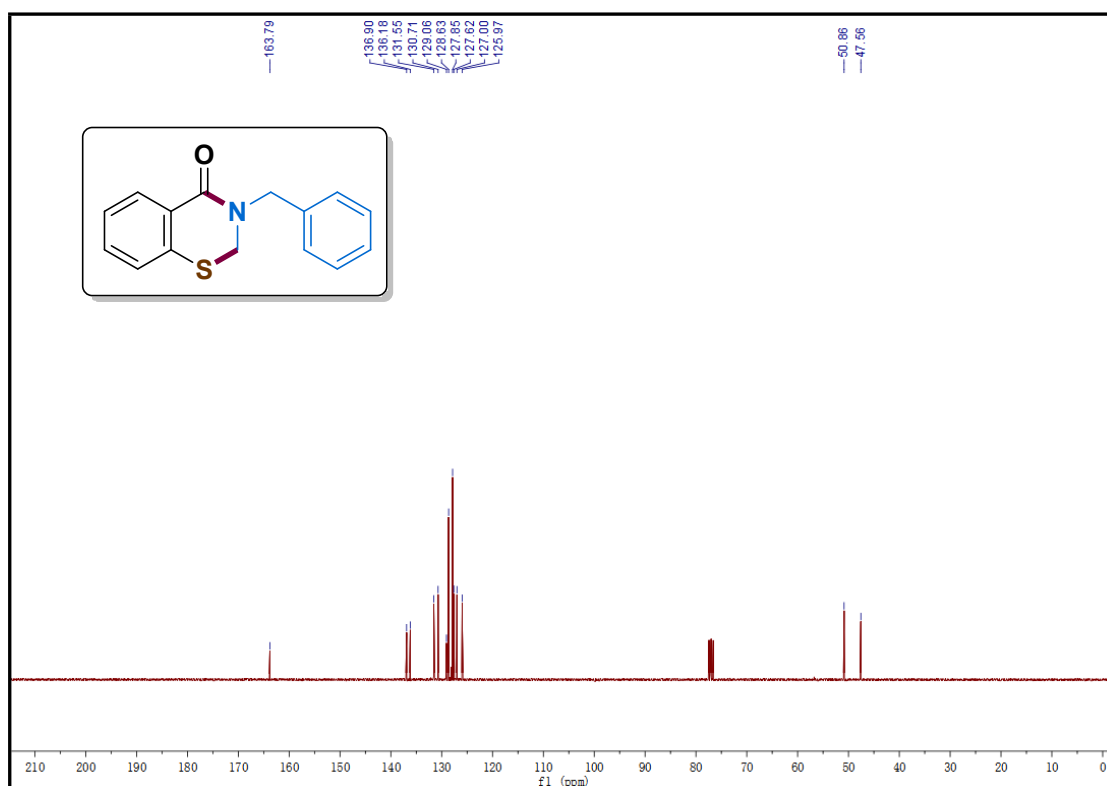

**3-(naphthalen-1-ylmethyl)-2,3-dihydro-4H-benzo[e][1,3]thiazin-4-one(4q)**

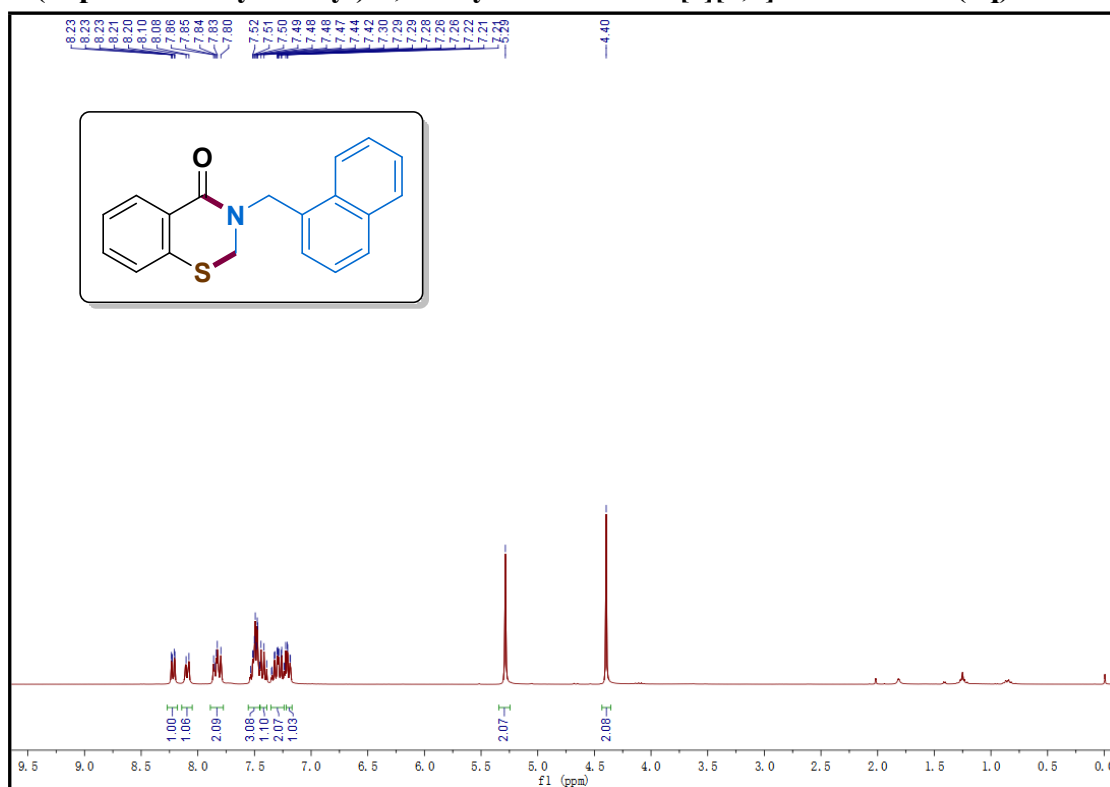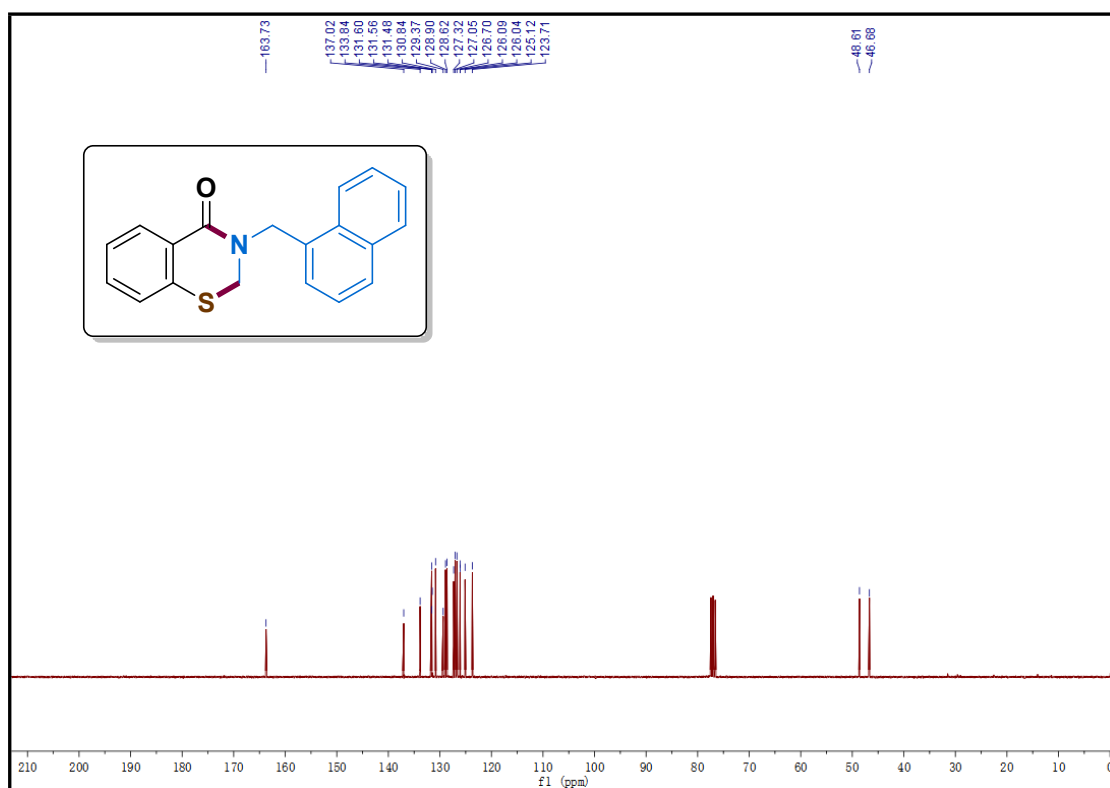

### 3-(3-methoxypropyl)-2,3-dihydro-4H-benzo[e][1,3]thiazin-4-one (4r)

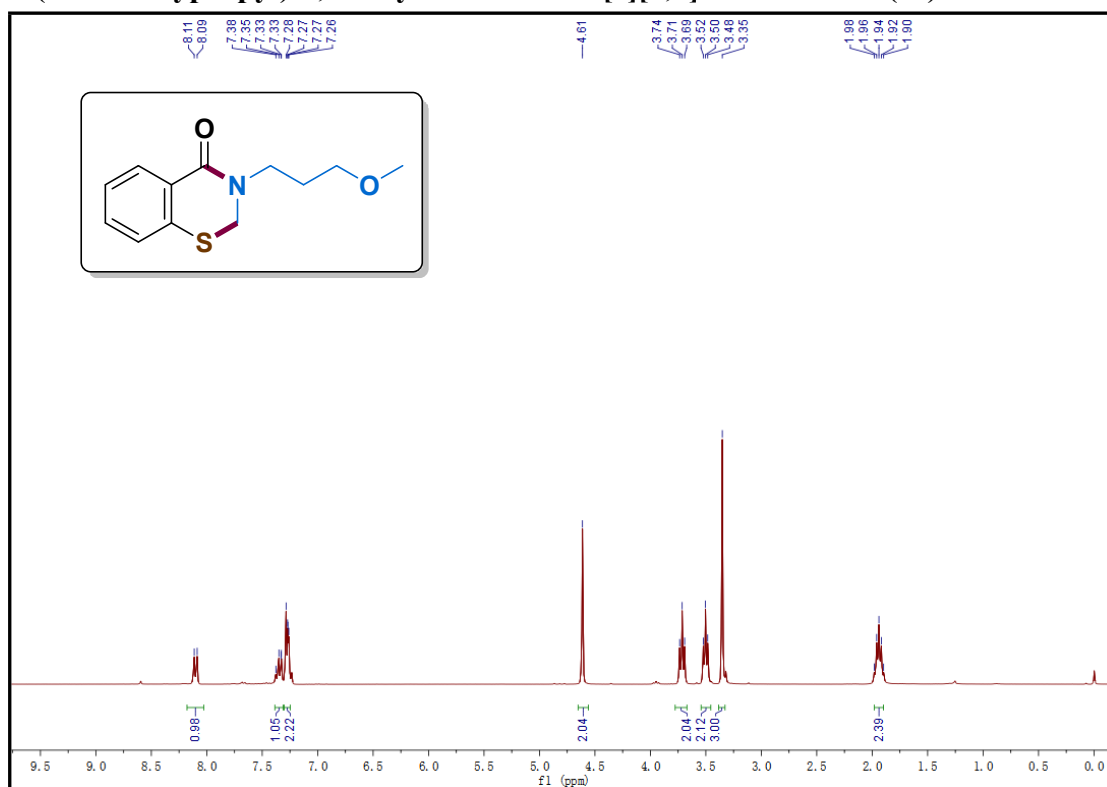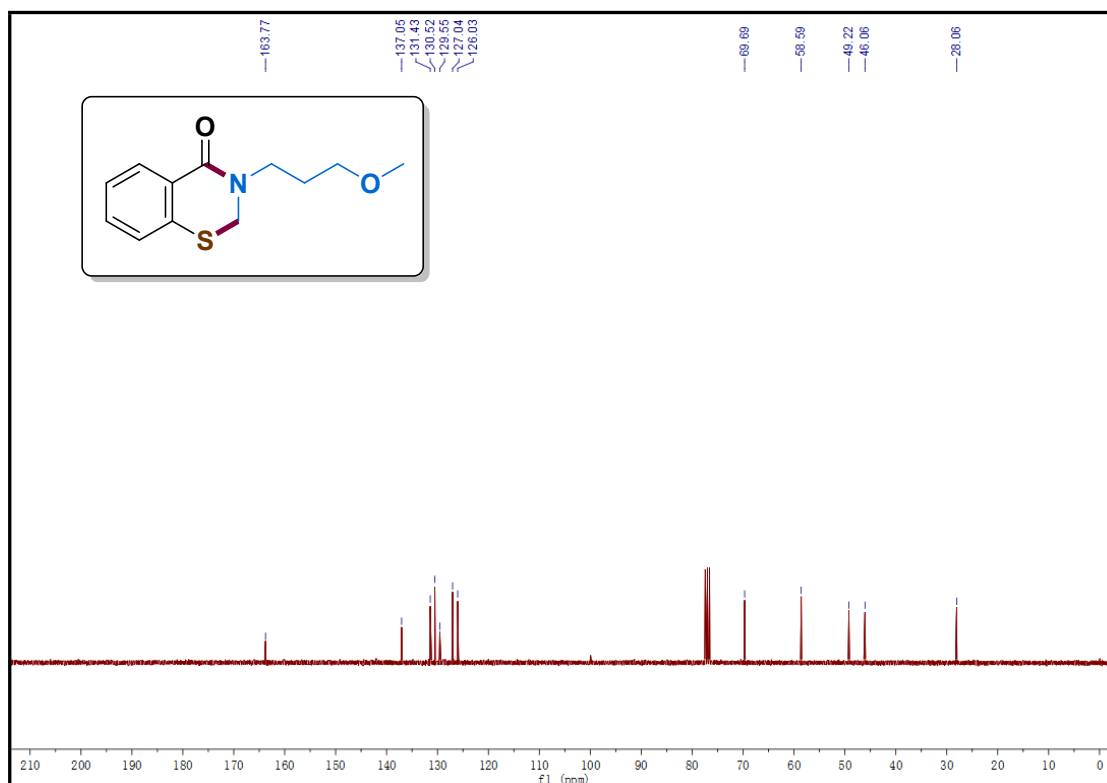

### 3-(2-hydroxyethyl)-2,3-dihydro-4H-benzo[e][1,3]thiazin-4-one (4s)

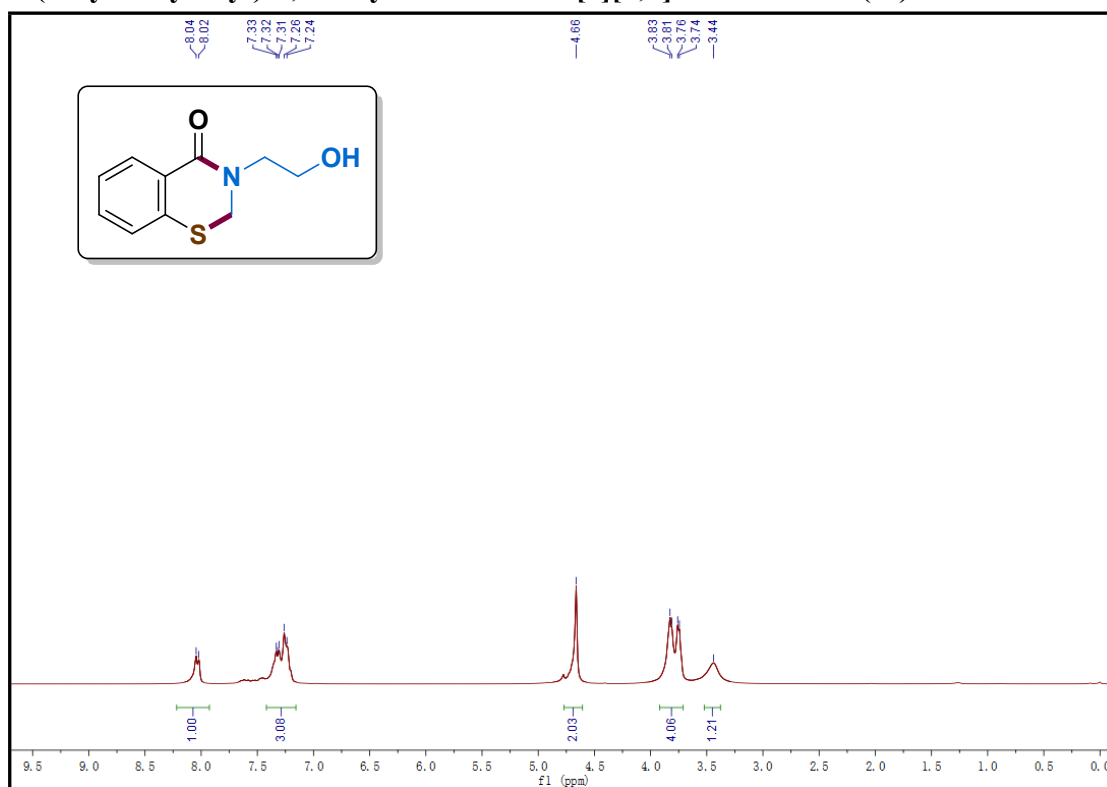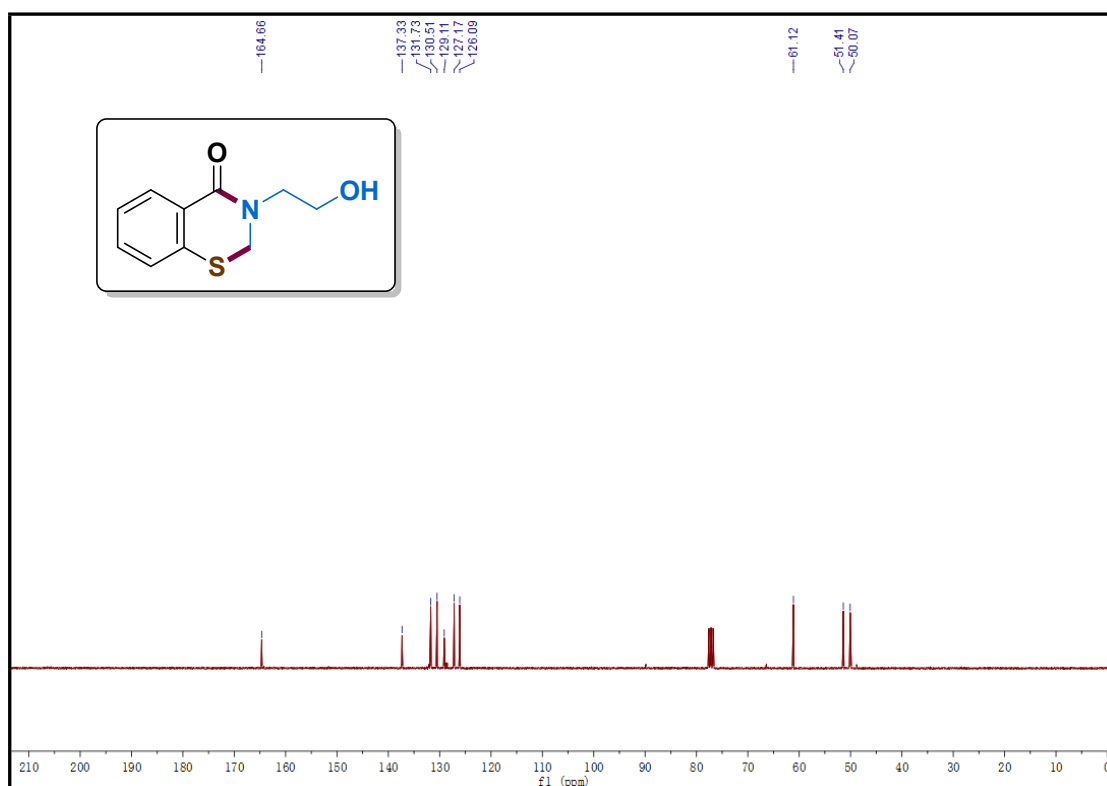

### 3-octadecyl-2,3-dihydro-4H-benzo[e][1,3]thiazin-4-one (4t)

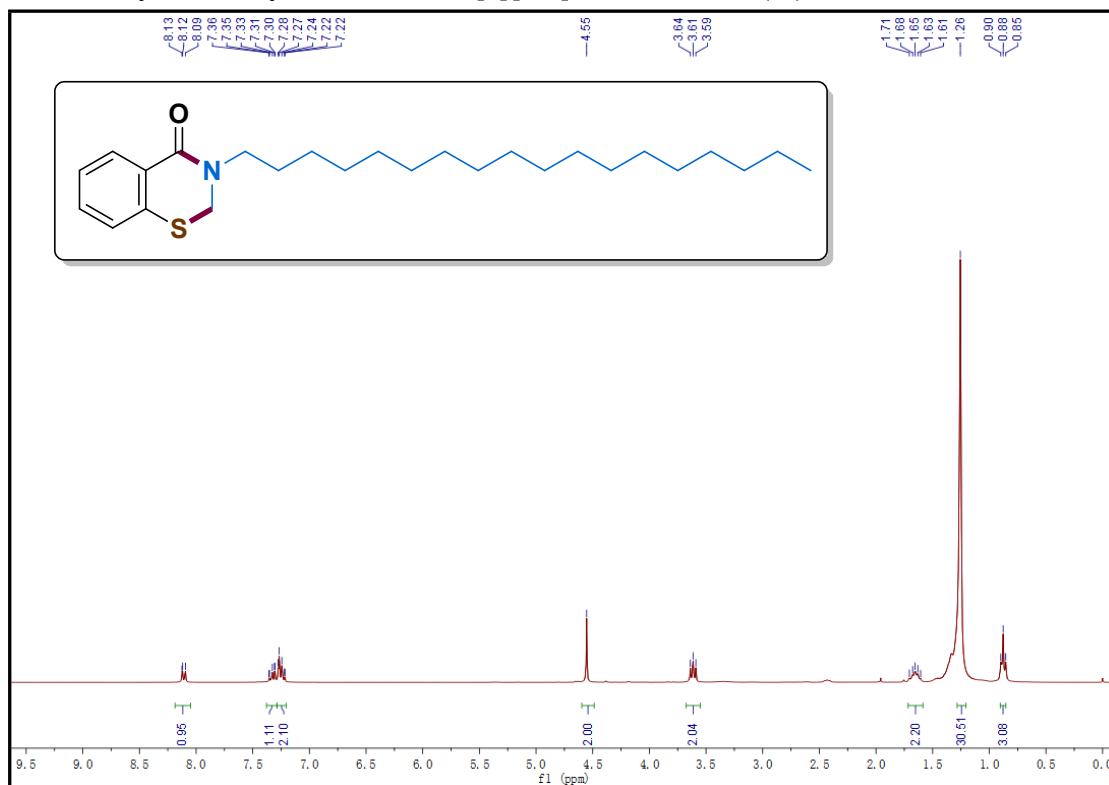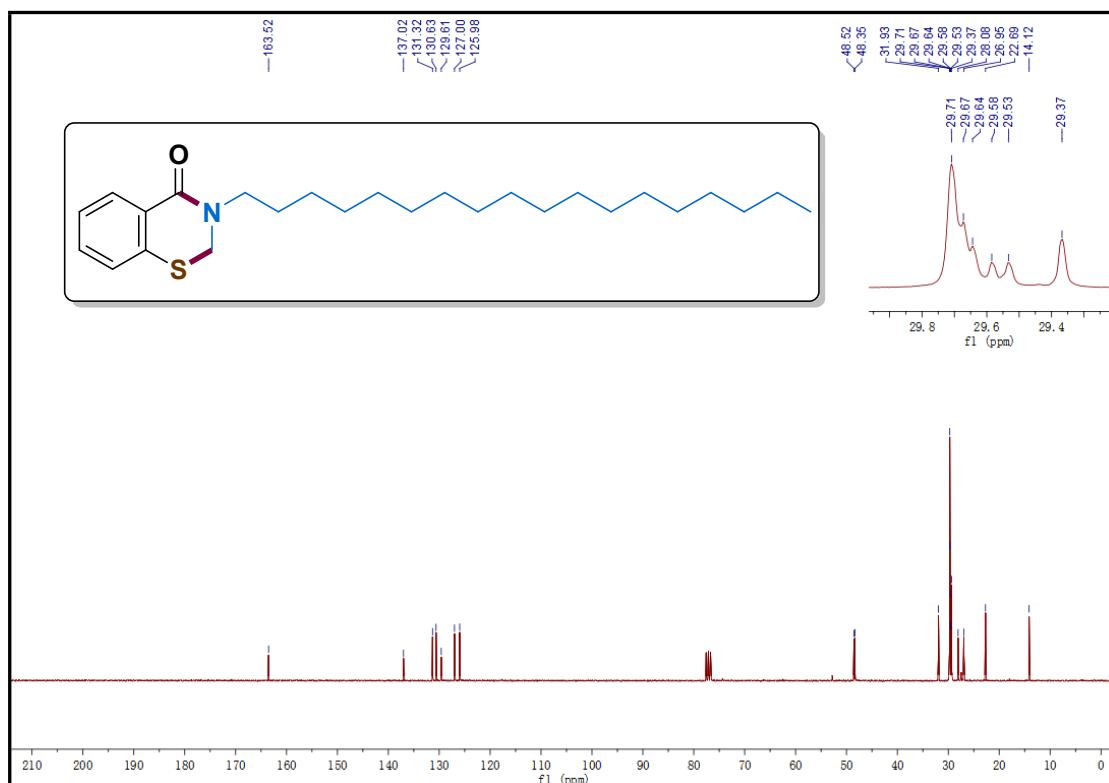

**3-((tetrahydro-2H-pyran-4-yl)methyl)-2,3-dihydro-4H-benzo[e][1,3]thiazin-4-one  
(4u)**

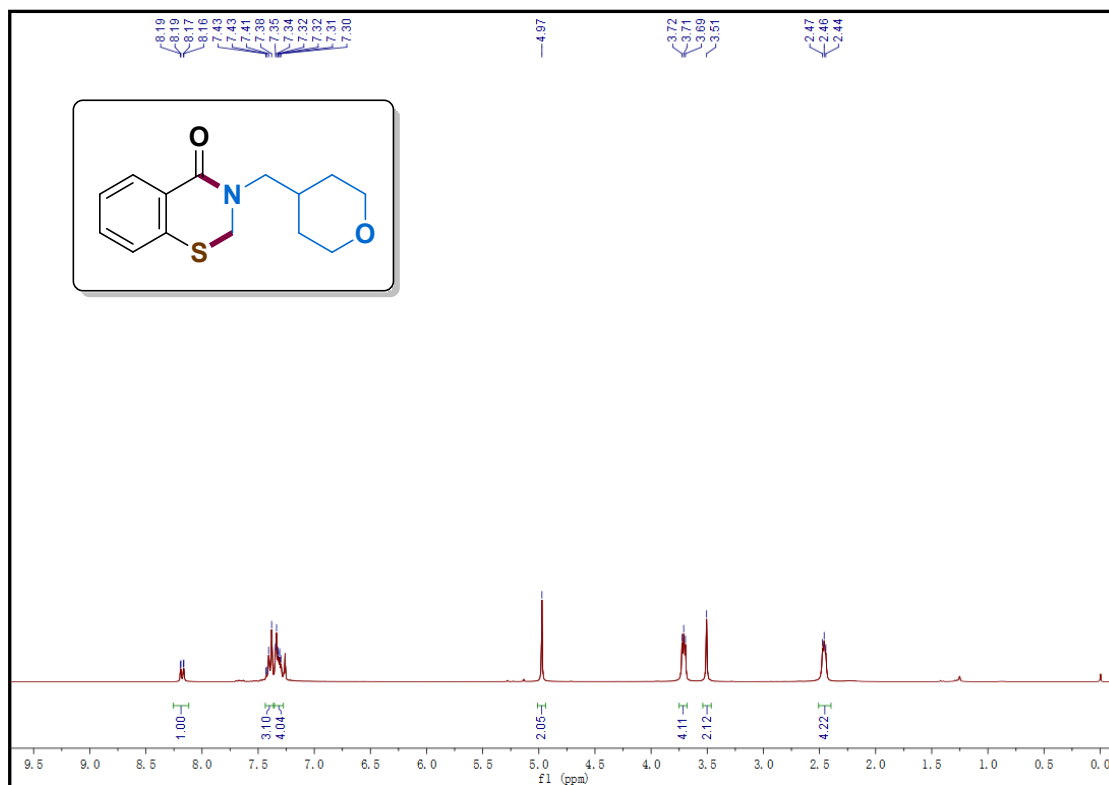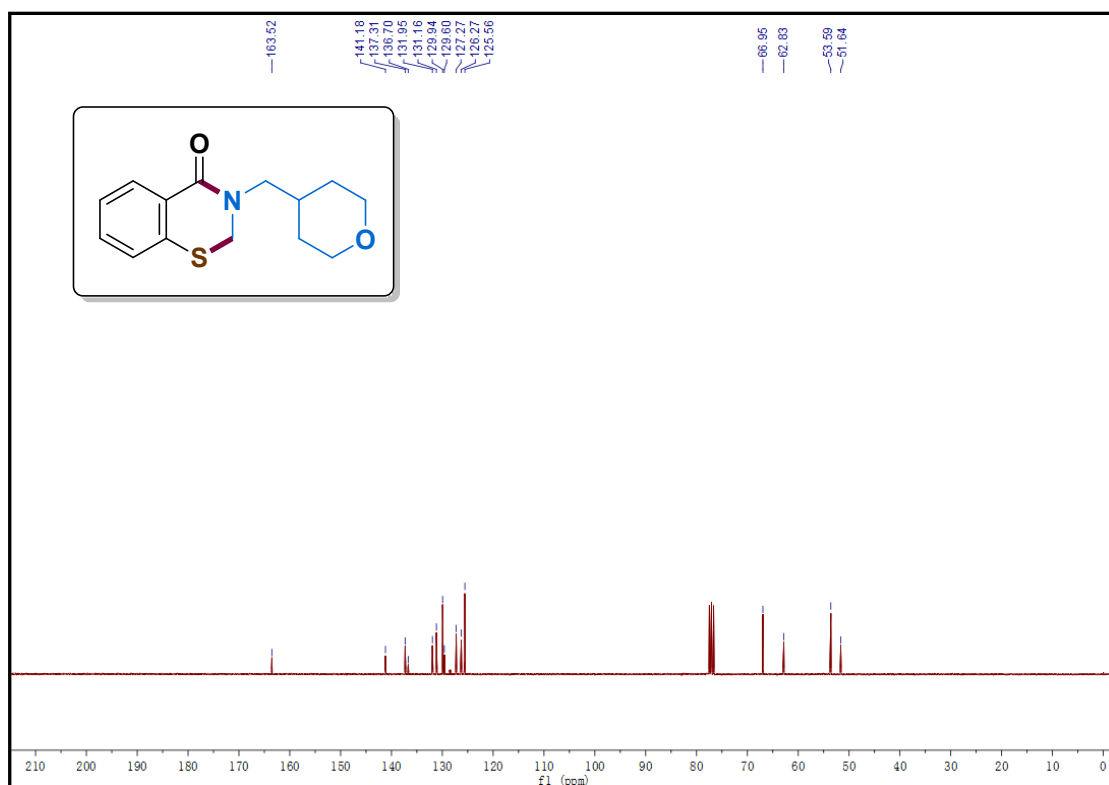

**3-(oxetan-3-yl)-2,3-dihydro-4H-benzo[e][1,3]thiazin-4-one (4v)**

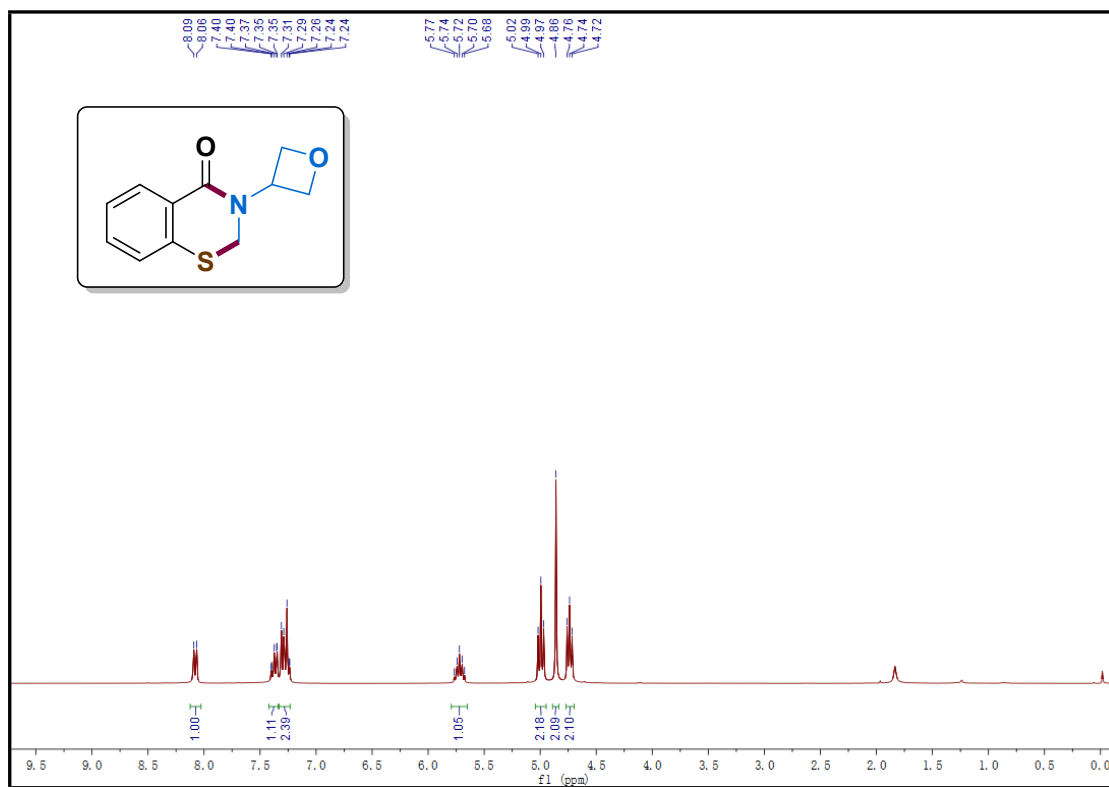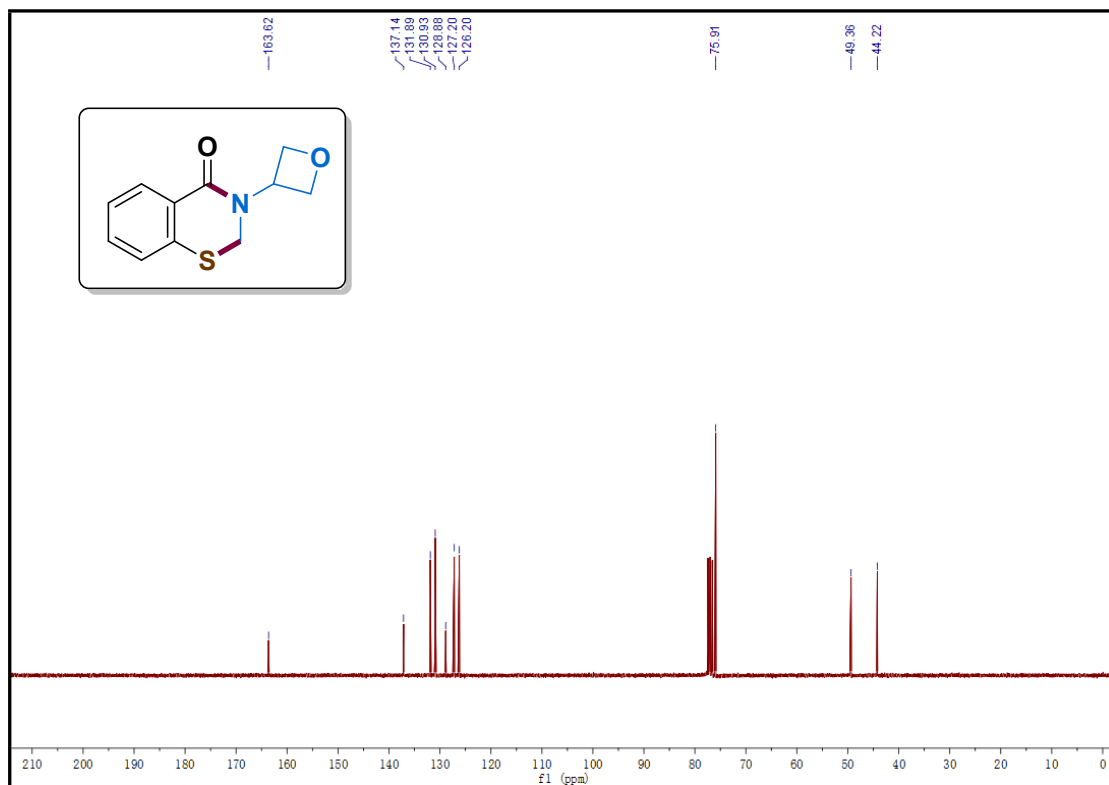

**2-(4-oxo-2H-benzo[e][1,3]thiazin-3(4H)-yl)ethyl 2-(1-(4-chlorobenzoyl)-5-methoxy-2-methyl-1H-indol-3-yl)acetate (5)**

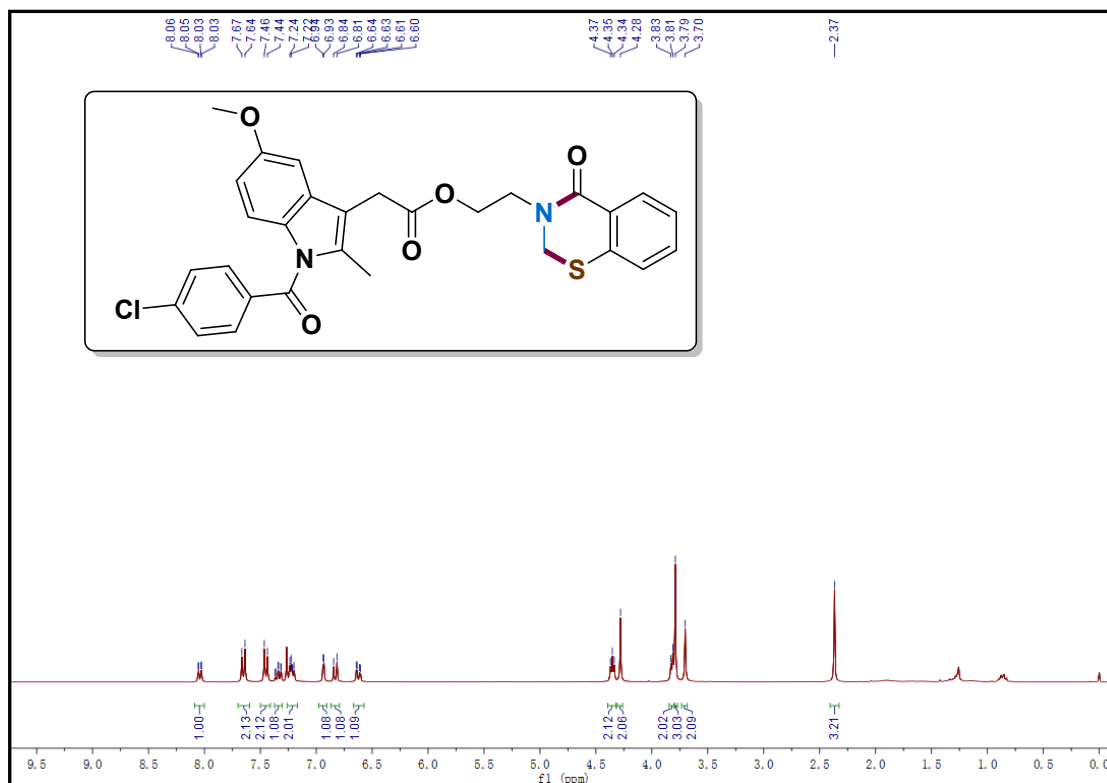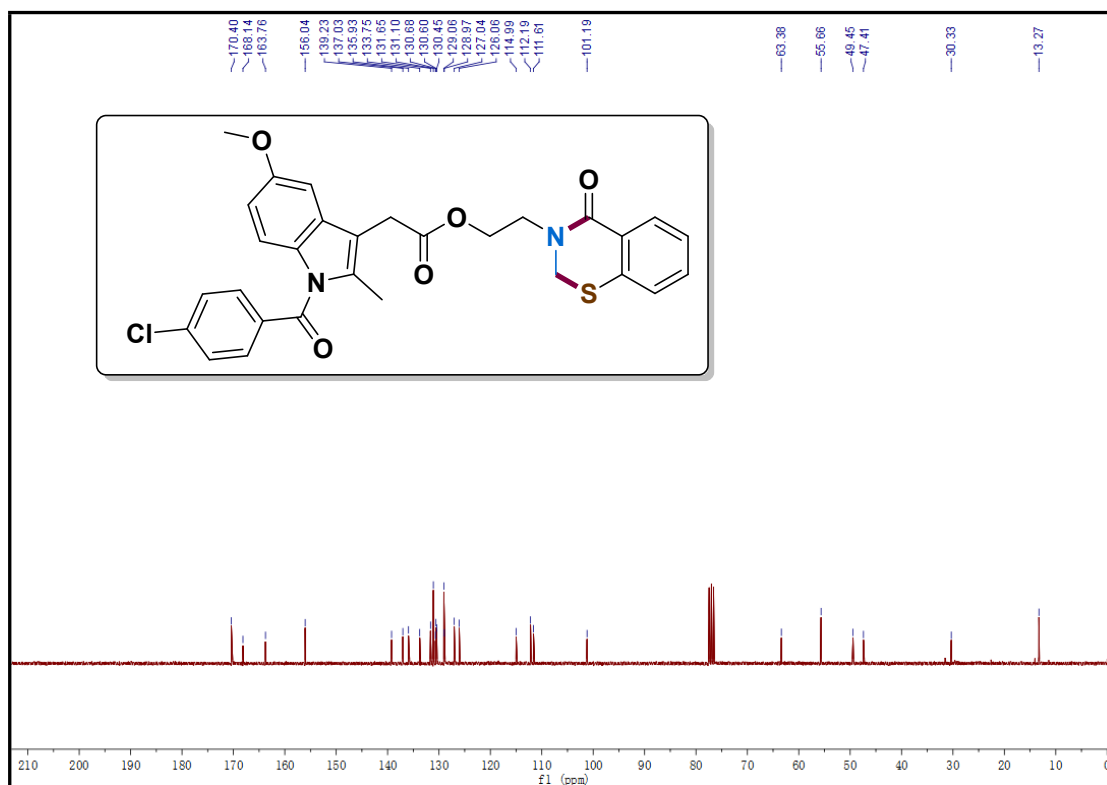



**2-(4-oxo-2H-benzo[e][1,3]thiazin-3(4H)-yl)ethyl(S)-4-  
((5S,8R,9S,10S,13R,14S,17R)-10,13-dimethyl-3,7,12-trioxohexadecahydro-1H-  
cyclopenta[a]phenanthren-17-yl)pentanoate (6)**

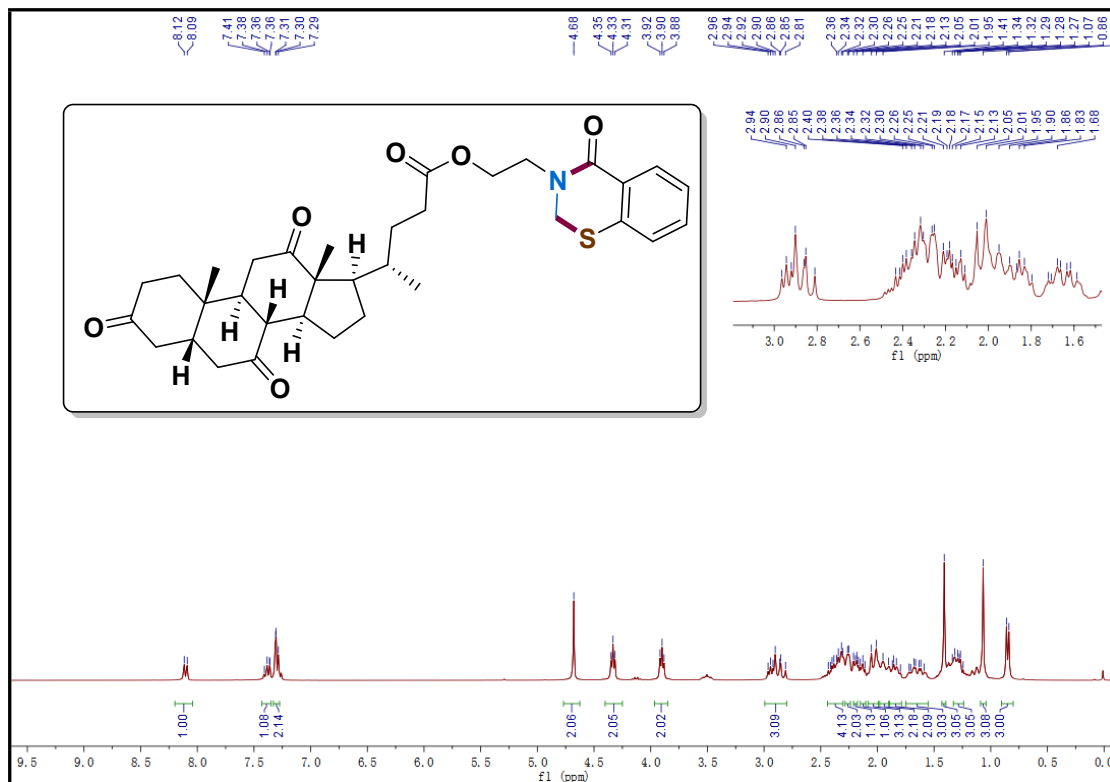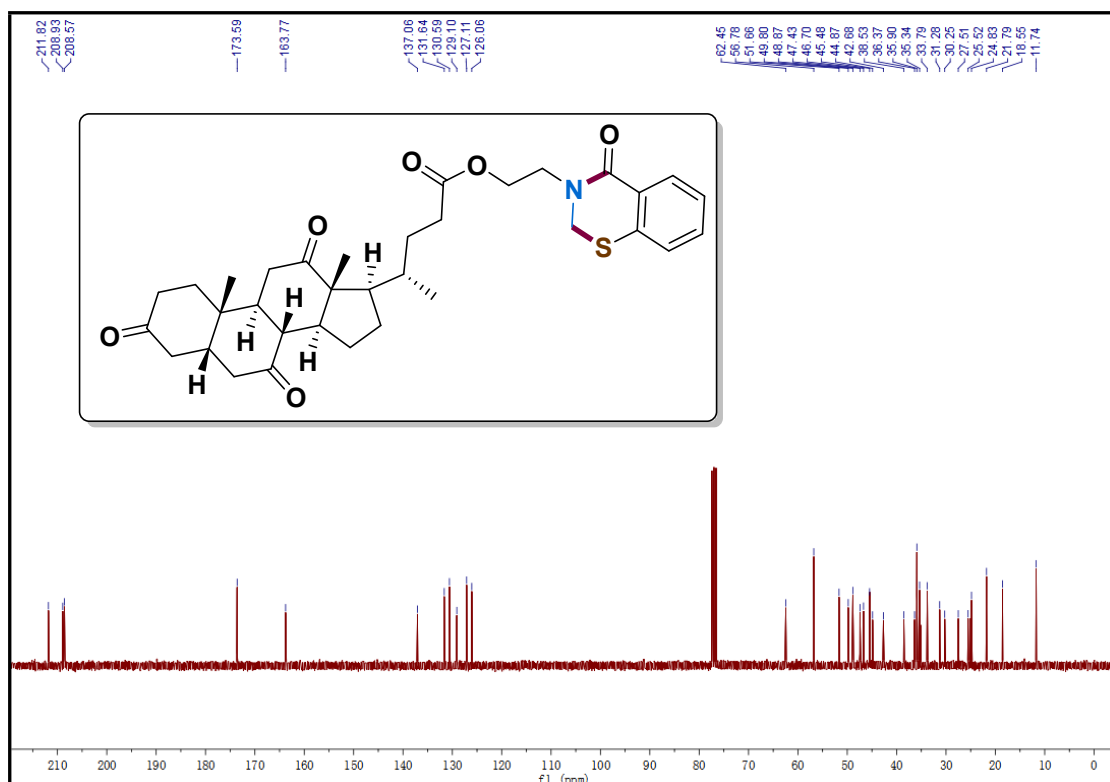

**3-benzyl-2,3-dihydro-4H-benzo[e][1,3]thiazin-4-one 1,1-dioxide (7)**

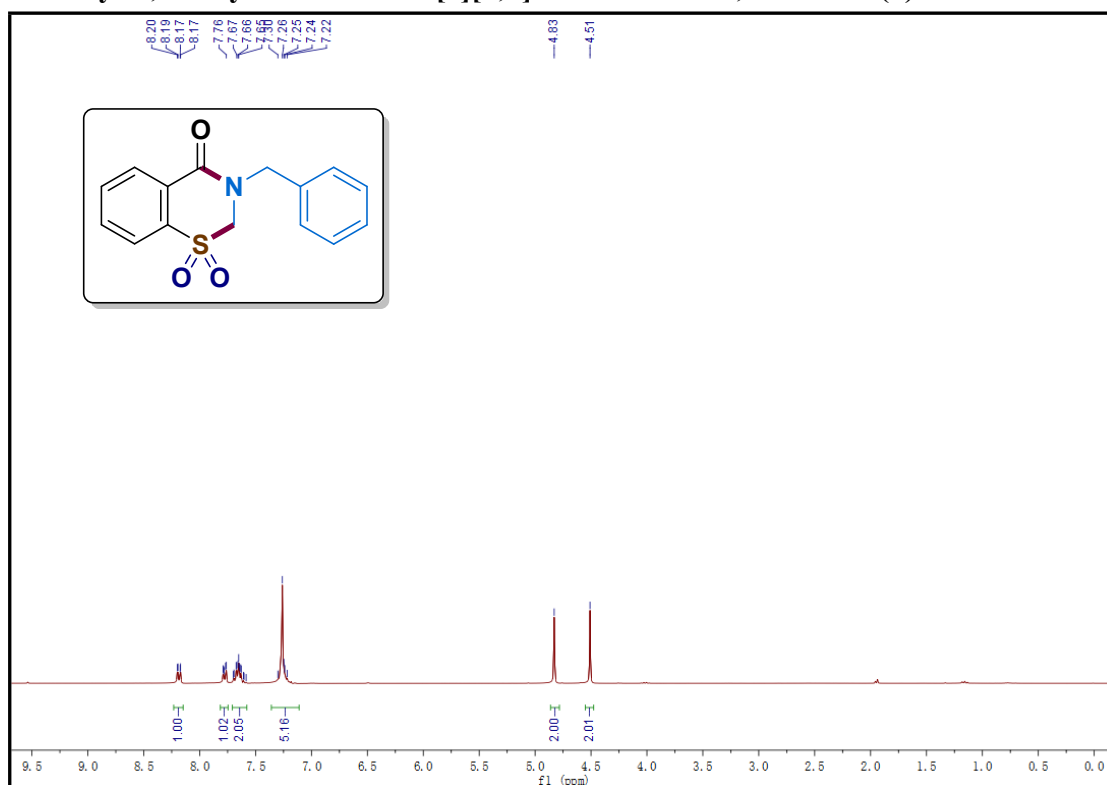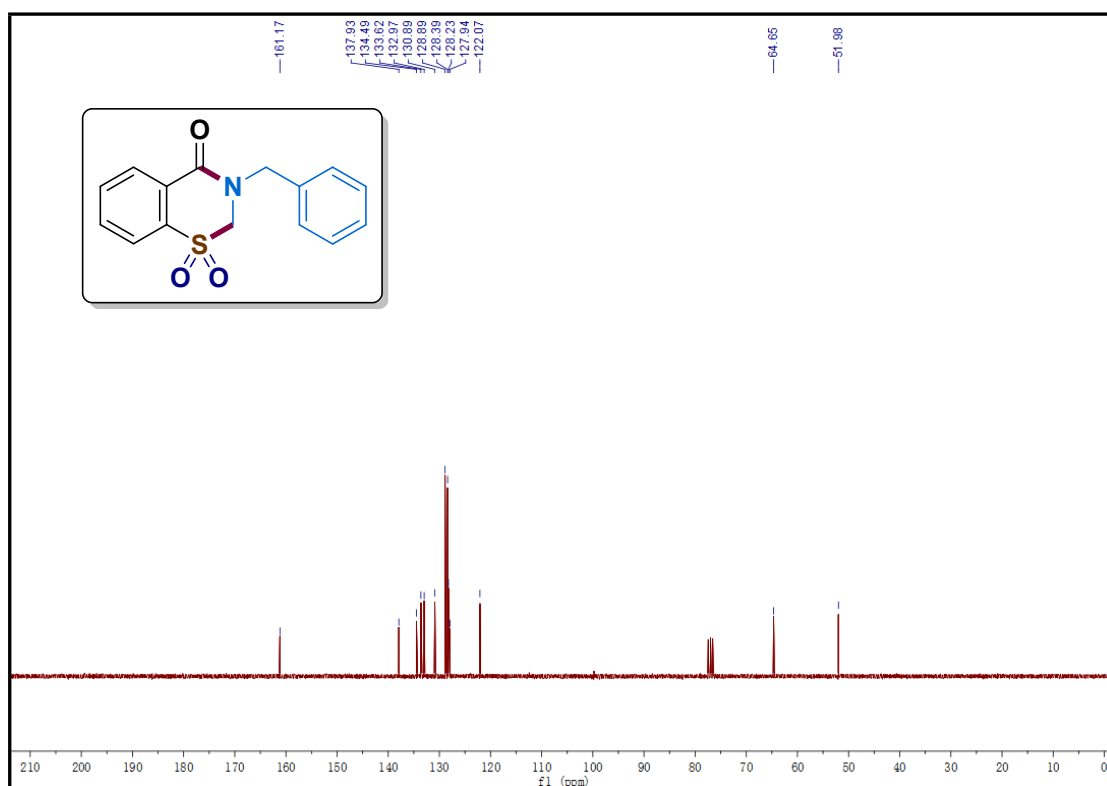

Supplement: d4qo00356j1.pdf [file d4qo00356j1.pdf]
